# Supplementary material for: Discovery of Nanomolar DCAF1 Small Molecule Ligands
Source: PubMed Central journal article supplement — J Med Chem. 2023 Mar 22;66(7):5041–60. doi: 10.1021/acs.jmedchem.2c02132 (PMC10108359; doi:10.1021/acs.jmedchem.2c02132), 2023-03-22

## Supplementary Information

### Discovery of Nanomolar DCAF1 Small Molecule Ligands

Alice Shi Ming Li<sup>1,2,3#</sup>, Serah Kimani<sup>1,4#</sup>, Brian Wilson<sup>2#</sup>, Mahmoud Noureldin<sup>2,3</sup>, Héctor González-Álvarez<sup>2,3</sup>, Ahmed Mamai<sup>2</sup>, Laurent Hoffer<sup>2</sup>, John P. Guilinger<sup>5</sup>, Ying Zhang<sup>5</sup>, Moritz von Rechenberg<sup>6</sup>, Jeremy S. Disch<sup>6</sup>, Christopher J. Mulhern<sup>6</sup>, Belinda L. Slakman<sup>6</sup>, John W. Cuzzo<sup>6</sup>, Aiping Dong<sup>1</sup>, Gennady Poda<sup>2,7</sup>, Mohammed Mohammed<sup>2</sup>, Punit Saraon<sup>2</sup>, Manish Mittal<sup>8</sup>, Pratik Modh<sup>8</sup>, Vaibhavi Rathod<sup>8</sup>, Bhashant Patel<sup>8</sup>, Suzanne Ackloo<sup>1</sup>, Vijayaratnam Santhakumar<sup>1</sup>, Magdalena M Szewczyk<sup>1</sup>, Dalia Barsyte-Lovejoy<sup>1,3</sup>, Cheryl H. Arrowsmith<sup>1,4,9</sup>, Richard Marcellus<sup>2</sup>, Marie-Aude Guie<sup>5</sup>, Anthony D. Keefe<sup>5</sup>, Peter J. Brown<sup>1\*</sup>, Levon Halabelian<sup>1,3\*</sup>, Rima Al-awar<sup>2,3,10\*</sup>, Masoud Vedadi<sup>1,2,3\*</sup>

<sup>1</sup>Structural Genomics Consortium, University of Toronto, Toronto, Ontario, M5G 1L7, Canada

<sup>2</sup>Drug Discovery Program, Ontario Institute for Cancer Research, Toronto, Ontario, M5G 0A3, Canada.

<sup>3</sup>Department of Pharmacology and Toxicology, University of Toronto, Toronto, Ontario, M5S 1A8, Canada.

<sup>4</sup>Princess Margaret Cancer Centre, University Health Network, Toronto, Ontario, M5G 2C1, Canada.

<sup>5</sup>X-Chem Inc., Waltham, Massachusetts, USA, 02453

<sup>6</sup>Relay Therapeutics, Cambridge, Massachusetts, USA, 02139

<sup>7</sup>Leslie Dan Faculty of Pharmacy, University of Toronto, Toronto, Ontario, M5S 3M2, Canada.

<sup>8</sup>Piramal Discovery Solutions, Pharmaceutical Special Economic Zone, Ahmedabad, Gujarat 382213, India

<sup>9</sup>Department of Medical Biophysics, University of Toronto, Toronto, Ontario, M5G 1L7, Canada.

<sup>10</sup>Department of Chemistry, University of Toronto, Toronto, Ontario, M5S 3H6, Canada.

#Equally contributed

\*Corresponding Authors:

**Masoud Vedadi**, Drug Discovery Program, Ontario Institute for Cancer Research, Toronto, Ontario, Canada. Email: [m.vedadi@utoronto.ca](mailto:m.vedadi@utoronto.ca); [mvedadi@oicr.on.ca](mailto:mvedadi@oicr.on.ca); Tel: 4164321980.

**Rima Al-awar**, Drug Discovery Program, Ontario Institute for Cancer Research, Toronto, Ontario, Canada. Email: [Rima.alawar@oicr.on.ca](mailto:Rima.alawar@oicr.on.ca),

**Levon Halabelian**, Structural Genomics Consortium, University of Toronto, Toronto, Ontario, Canada. Email: [l.halabelian@utoronto.ca](mailto:l.halabelian@utoronto.ca)

**Peter J. Brown**, Structural Genomics Consortium, University of Toronto, Toronto, Ontario, Canada. Email: [peterj.brown@utoronto.ca](mailto:peterj.brown@utoronto.ca)

## Table of Contents

|                                                                                                             |     |
|-------------------------------------------------------------------------------------------------------------|-----|
| <b>Figure S1.</b> Melting curves of DCAF1 WDR domain.....                                                   | S3  |
| <b>Figure S2.</b> Orthogonal confirmation by ITC.....                                                       | S3  |
| <b>Figure S3.</b> Analysis of co-crystal structure of DCAF1 WDR domain in complex with two enantiomers..... | S4  |
| <b>Figure S4.</b> Zoomed-in view of the compound <b>3d</b> binding site in the chain A of DCAF1-3d.....     | S5  |
| <b>Figure S5.</b> Zoomed-in view of the compound <b>26e</b> binding site in the chain A of DCAF1-26e.....   | S6  |
| <b>Figure S6.</b> No target engagement observed for full length DCAF1.....                                  | S6  |
| <b>Table S1.</b> Concentration-dependent Stabilization of DCAF1 WD domain by compound <b>26e</b> ...        | S7  |
| <b>Report: Enantiomeric Excess of Compounds 3c (407) &amp; 3d (406)</b> .....                               | S8  |
| <b><sup>1</sup>H NMR Spectra for tested compounds</b> .....                                                 | S10 |
| <b><sup>13</sup>C NMR Spectrum for Compound 26e</b> .....                                                   | S26 |
| <b>LCMS Spectra for tested compounds</b> .....                                                              | S27 |

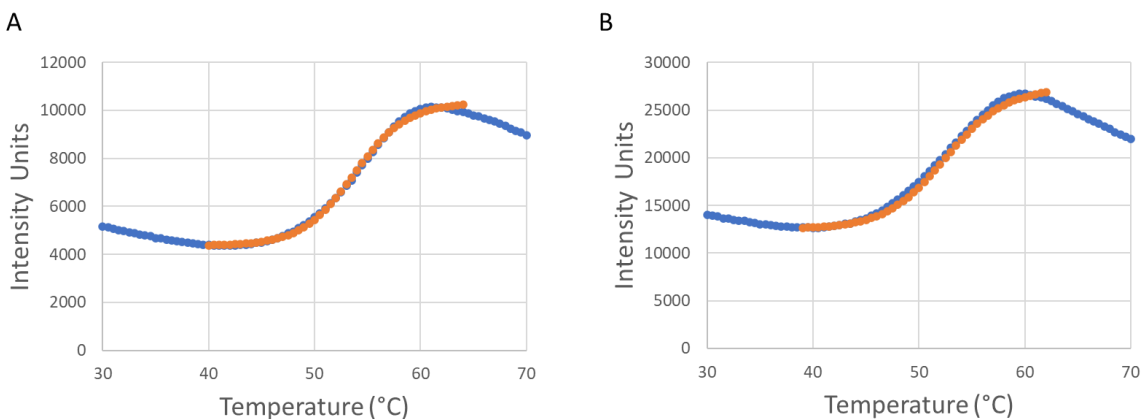

**Figure S1.** Melting curves of DCAF1 WDR domain. DCAF1 WDR domain showed amenability to differential scanning fluorimetry at two tested concentrations (A) 0.1 mg/mL and (B) 0.4 mg/mL. Both concentrations showed a transition with melting temperatures  $T_m$  of 53.7 °C and 52.0 °C, respectively.

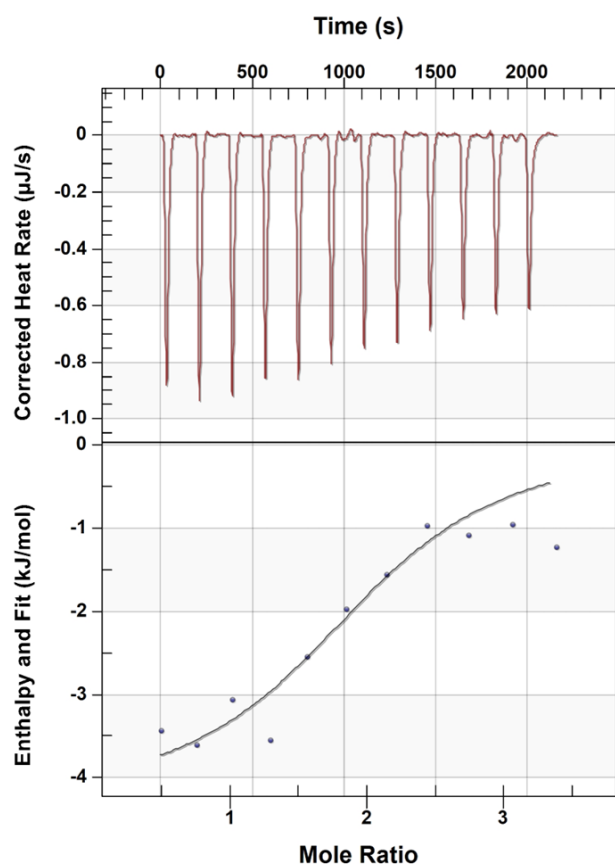

**Figure S2.** Orthogonal confirmation by ITC. The binding interaction between DCAF1 and original hit compound (Enamine, Z1391232269) was confirmed with an estimated  $K_D$  of 9  $\mu$ M. Experiment was performed in singlet.

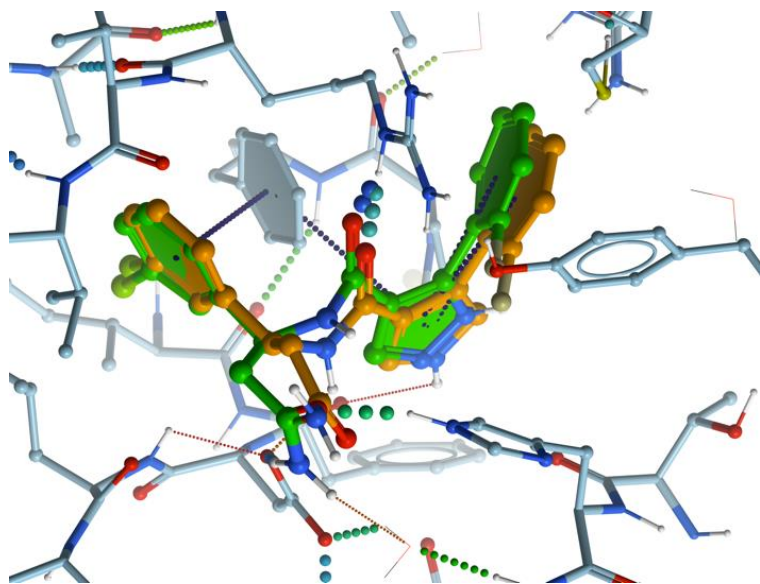

**Figure S3. Analysis of co-crystal structure of DCAF1 WDR domain in complex with two enantiomers.** Co-crystal structure showed the hit compound with R-configuration (in green) bound to DCAF1 with suboptimal geometry around the central amide function (neither trans nor cis configuration). Molecular modeling refinements showed the alternate enantiomer (S-configuration in orange) is a better fit of the co-crystal structure, while exhibiting optimal internal conformation.

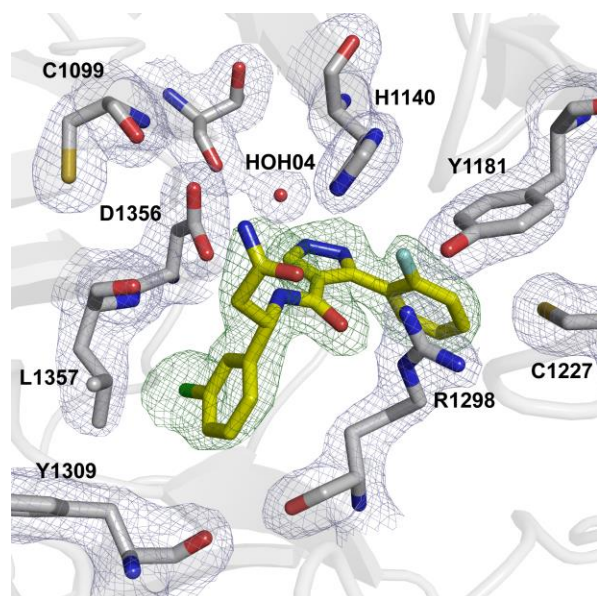

**Figure S4. Zoomed-in view of compound 3d binding site in chain A of DCAF1-3d.** The protein residues in the vicinity of the compound are shown as sticks in light grey, the water molecule is depicted as a red sphere and the measured 2Fo-Fc electron density map is shown as grey mesh, contoured at 1.0 $\sigma$  level. The electron density omit map (Fo-Fc) shown as green mesh contoured at 3 $\sigma$  level corresponds to compound 3d (shown as yellow sticks).

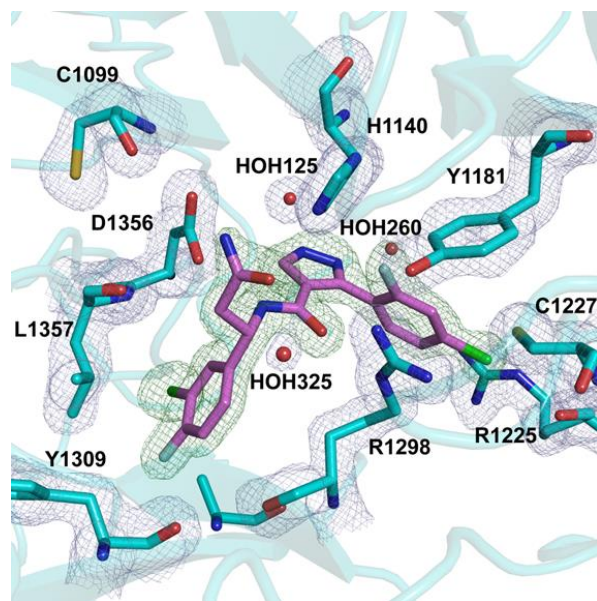

**Figure S5. Zoomed-in view of the compound 26e binding site in chain A of DCAF1-26e.** The protein residues in the binding site are shown as cyan sticks, water molecules are rendered as red spheres and the measured 2Fo-Fc electron density map is shown as grey mesh, contoured at 1.0 $\sigma$  level. The electron density omit map (Fo-Fc) shown as green mesh contoured at 3 $\sigma$  level corresponds to the **26e** compound (shown as magenta sticks).

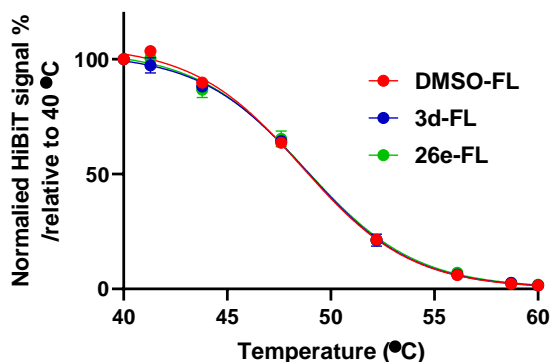

**Figure S6.** No target engagement observed for full length DCAF1. Neither **3d** nor **26e** were able to thermally stabilize full length DCAF1 at 40  $\mu$ M. Results shown as average  $\pm$  SD (n=3).

**Table S1.** Concentration-dependent stabilization of DCAF1 WD domain by compound **26e**

| Compound <b>26e</b> ( $\mu$ M) | $\Delta T_m$ ( $^{\circ}$ C) |
|--------------------------------|------------------------------|
| 100                            | 7.4 $\pm$ 0.5                |
| 50                             | 6.9 $\pm$ 0.4                |
| 25                             | 5.8 $\pm$ 0.3                |
| 12.5                           | 3.3 $\pm$ 0.1                |
| 6.25                           | 1.6 $\pm$ 0.1                |
| 3.125                          | 0.8 $\pm$ 0.3                |

## 1. Report: Enantiomeric Excess of Compounds 3c (407) & 3d (406) (Lotus Separations)

### Chiral SFC Analyses for Enantiomeric Excess

|                     |                                                           |                 |                      |
|---------------------|-----------------------------------------------------------|-----------------|----------------------|
| <b>Title:</b>       | Chiral SFC Analysis for Enantiomeric Excess Determination |                 |                      |
| <b>Sample Name:</b> | Rac, 168b, 168c, 406 and 407                              | <b>Date:</b>    | 28-Sep-2021          |
| <b>Requestor:</b>   | Peter Brown                                               | <b>Company:</b> | SGC, Univ of Toronto |

#### Summary

Analyses for enantiomeric excess (ee) determination were requested for samples, 168b, 168c, 406 and 407 with the racemate provided. Chiral SFC separation conditions were developed and used, as described under Experimental Details below. The ee results are tabulated below.

| Sample ID | Enantiomeric excess (ee)    |
|-----------|-----------------------------|
| 168b      | 91.3%                       |
| 168c      | 92.5%                       |
| 406       | 96.8% (opposite enantiomer) |
| 407       | 92.3%                       |

The chromatograms and integration results are shown in the following pages. The ID of the peaks were based on the retention match between the peaks in the racemate provided and those in the samples.

#### Experimental Details

|                                  |                                                                   |                                                        |
|----------------------------------|-------------------------------------------------------------------|--------------------------------------------------------|
| <b>SFC Analytical Conditions</b> | Instrument:                                                       | Agilent Aurora SFC                                     |
|                                  | Column:                                                           | Enantiocel A6-5 5µm, 250(L) x 4.6(ID) mm               |
|                                  | Temperature:                                                      | Ambient                                                |
|                                  | Flow rate:                                                        | 2 mL/min                                               |
|                                  | Mobile Phase:                                                     | 40% EtOH with 0.1% diethyl amine / 60% CO <sub>2</sub> |
|                                  | Back-Pressure:                                                    | 100 bar                                                |
|                                  | Injection volume:                                                 | 15 µL                                                  |
| <b>Sample Prep.:</b>             | 1:1 dilution with MeOH of the 20mM DMSO sample solutions provided |                                                        |

|                |                          |       |         |                           |    |
|----------------|--------------------------|-------|---------|---------------------------|----|
| OICR0036766A02 | BJW-0010-0406-05         | 20 mM | 406     | as much as you can supply | S  |
| OICR0036767A02 | BJW-0010-0407-05         | 20 mM | 407     | as much as you can supply | R  |
|                | mixture of 2 above solns | 20 mM | racemic | 150 microL of each mixed  | RS |
|                | UB023168b                | 20 mM | 168b    | as much as you can supply | R  |
|                | UB023168c                | 20 mM | 168c    | as much as you can supply | R  |

Chromatograms and Results:

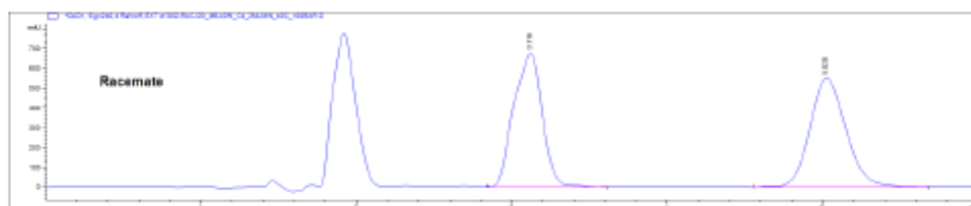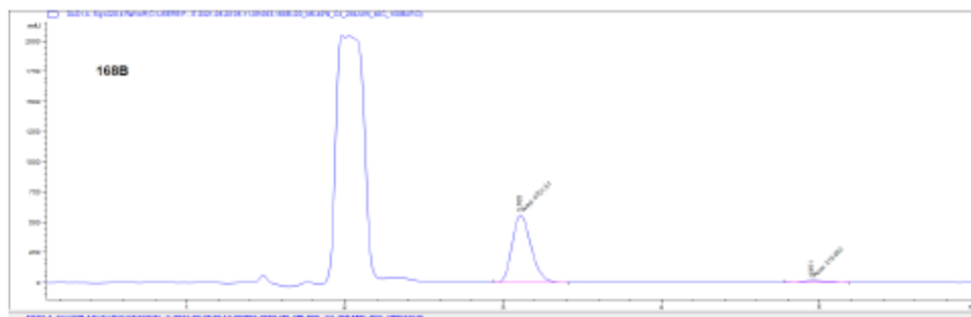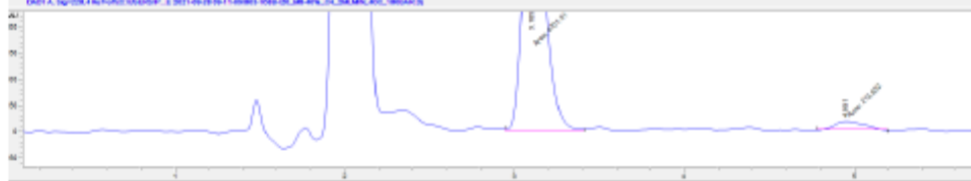

| # | Time  | Type | Area   | Height | Width  | Area%  |
|---|-------|------|--------|--------|--------|--------|
| 1 | 3.105 | MF   | 4701.5 | 557.3  | 0.1406 | 95.653 |
| 2 | 4.951 | MM   | 213.7  | 17.1   | 0.2084 | 4.347  |

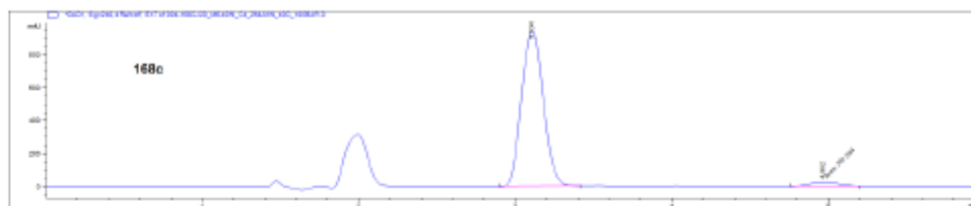

| # | Time  | Type | Area   | Height | Width  | Area%  |
|---|-------|------|--------|--------|--------|--------|
| 1 | 3.104 | VB   | 9121.1 | 947.2  | 0.1543 | 96.233 |
| 2 | 4.962 | MM   | 357.1  | 26.4   | 0.225  | 3.767  |



### Chiral SFC Analyses for Enantiomeric Excess

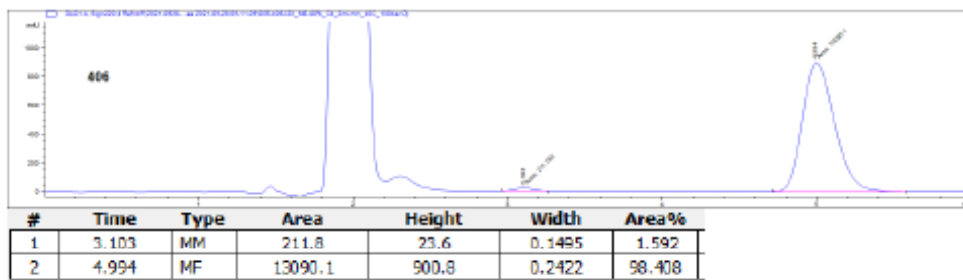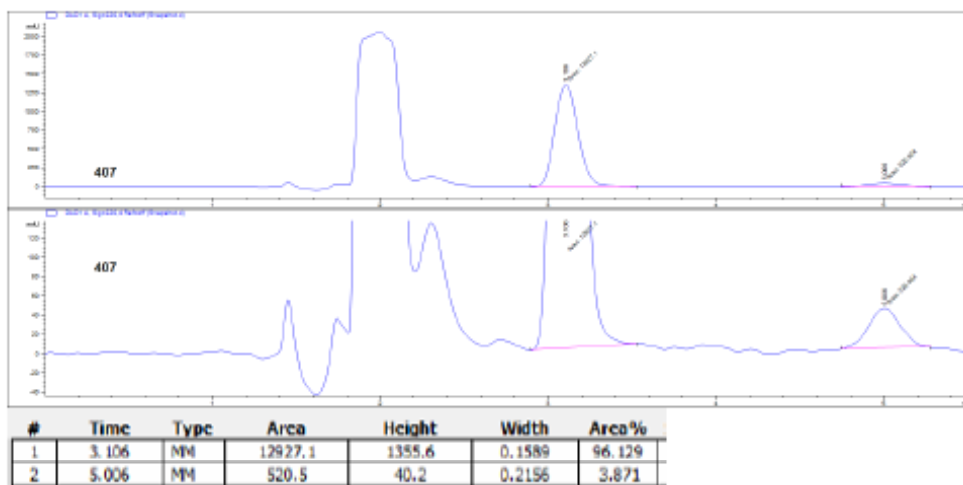

## 2. $^1\text{H}$ NMR Spectra for tested compounds

$^1\text{H}$  NMR Spectrum for compound **3a** (DMSO- $d_6$ , 500 MHz)

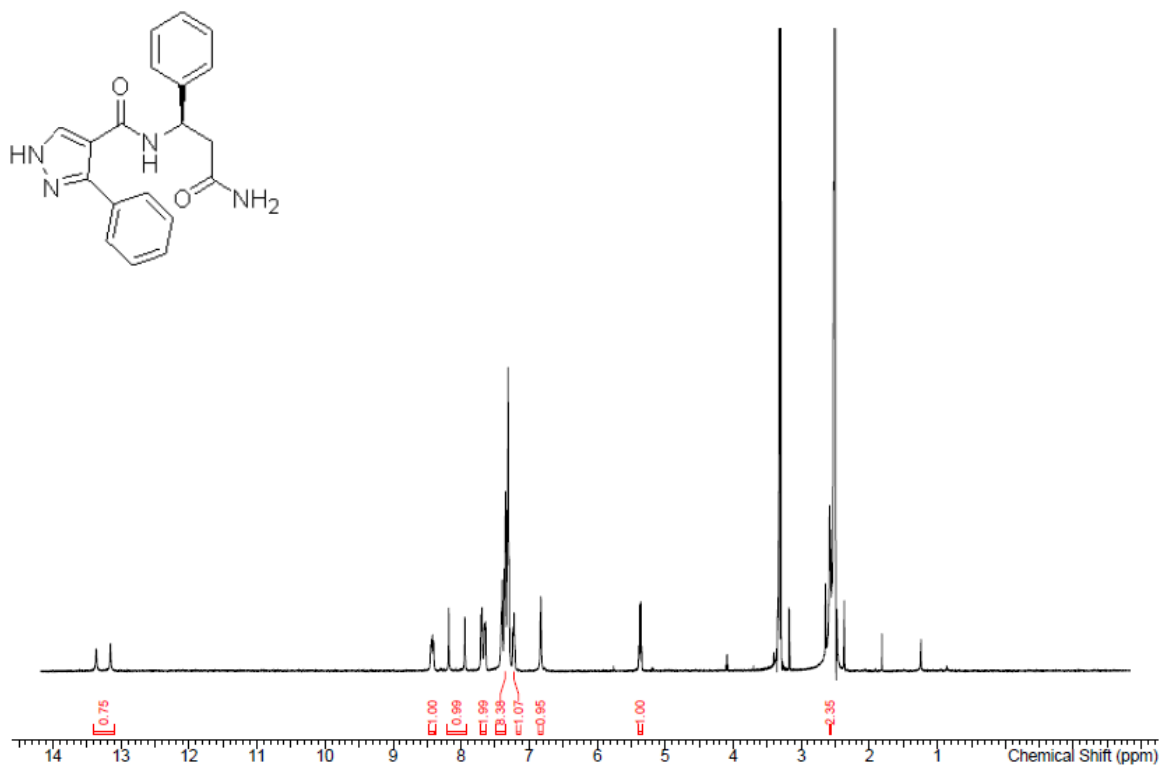

$^1\text{H}$  NMR Spectra for compound **3b** (DMSO- $d_6$ , 500 MHz)

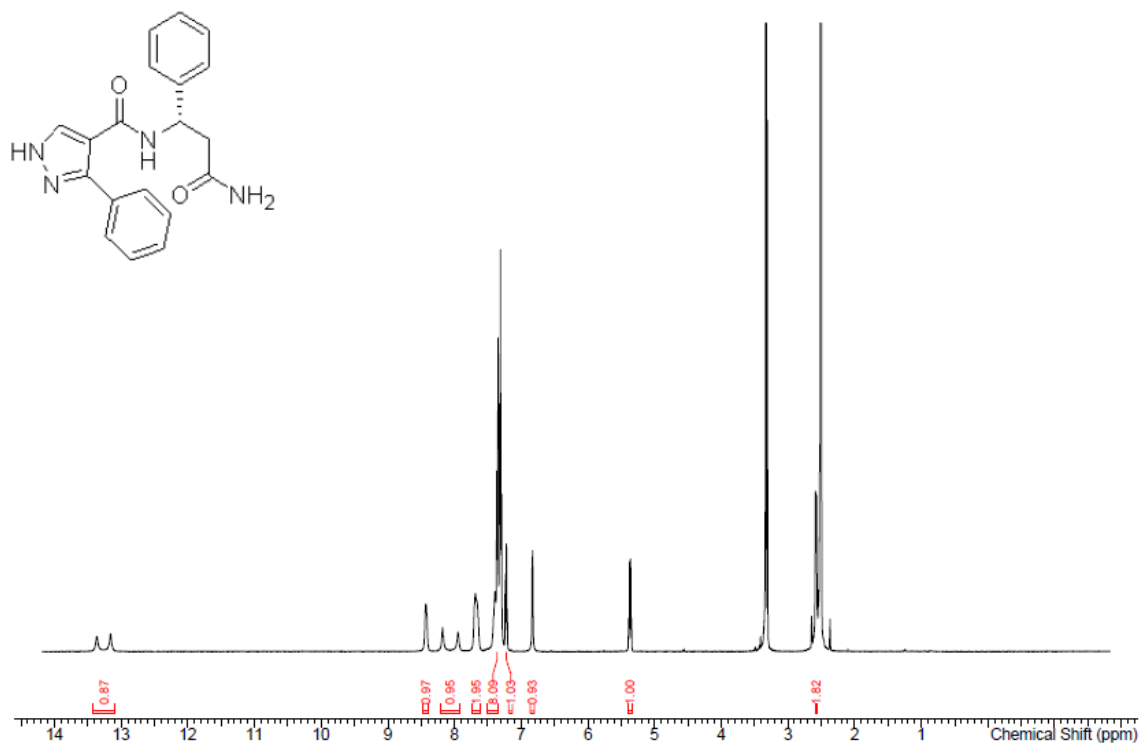

<sup>1</sup>H NMR Spectra for compound **3c** (DMSO-*d*<sub>6</sub>, 500 MHz)

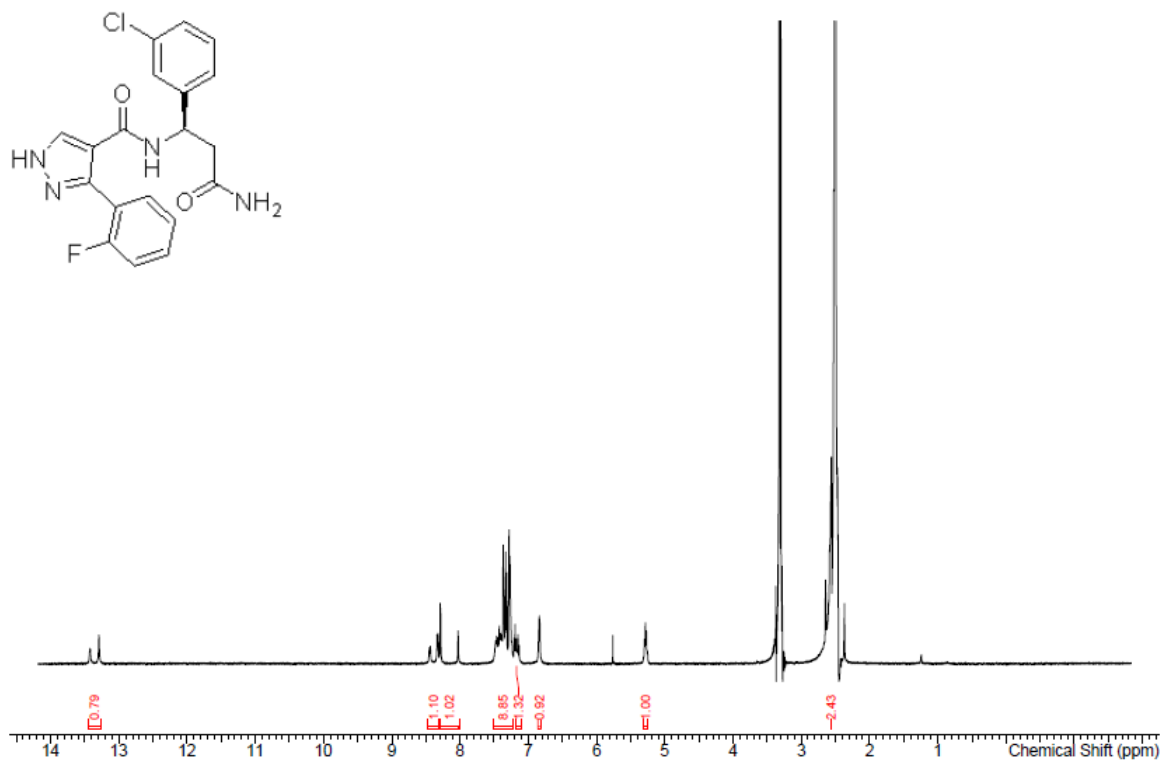

<sup>1</sup>H NMR Spectra for compound **3d** (DMSO-*d*<sub>6</sub>, 500 MHz)

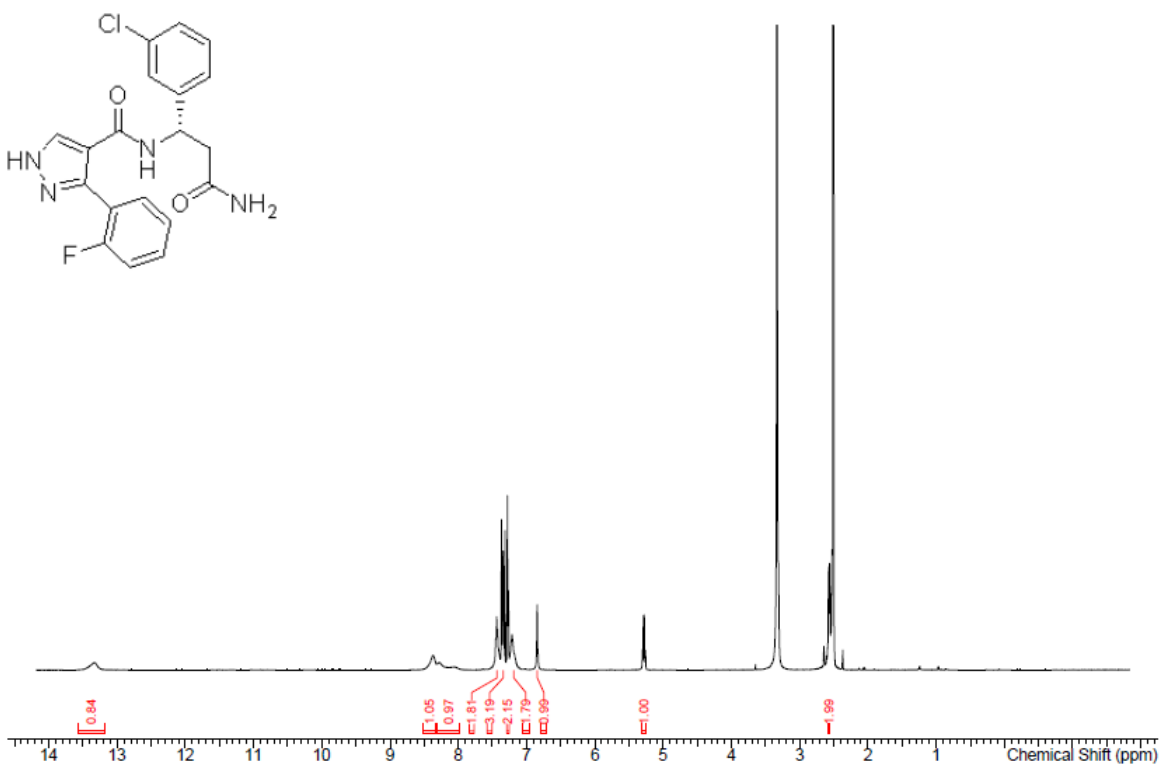

### <sup>1</sup>H NMR Spectra for compound **5a** (MeOH-*d*<sub>4</sub>, 500 MHz)

<sup>1</sup>H NMR (METHANOL-*d*<sub>4</sub>, 500 MHz) δ 7.91 (d, 1H, *J*=4.5 Hz), 7.48-7.44 (m, 2H), 7.28-7.22 (m, 4H), 7.22-7.13 (m, 3H), 5.36-5.30 (m, 1H), 3.84 (d, 3H, *J*=4.6 Hz), 2.63-2.56 (m, 2H)

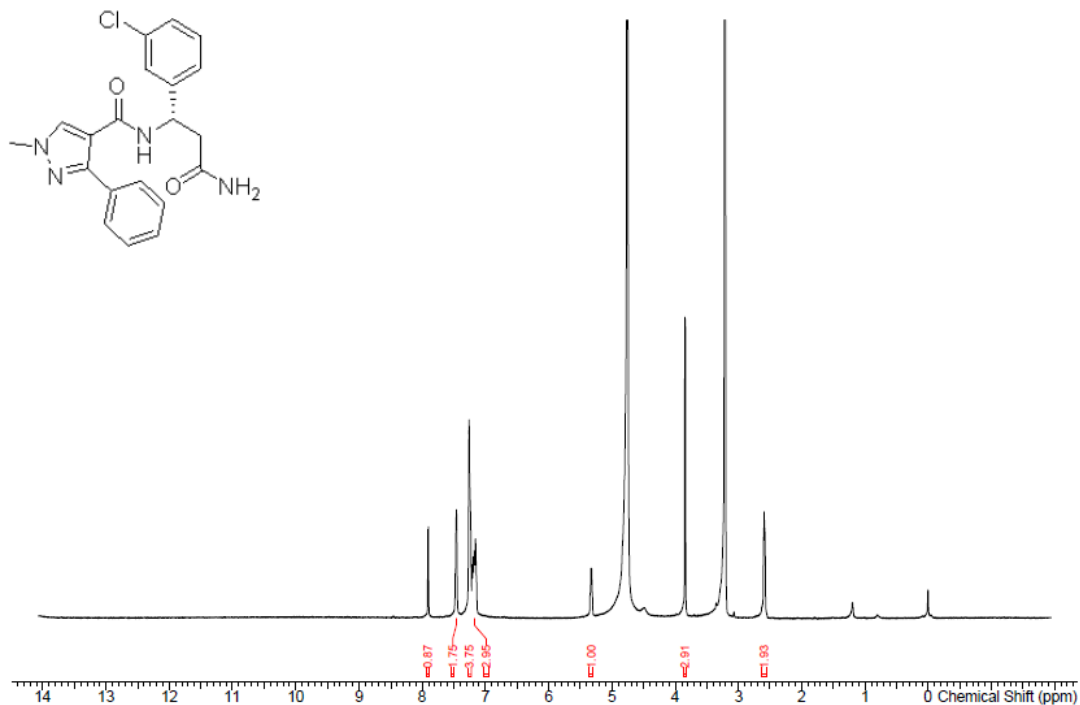

### <sup>1</sup>H NMR Spectra for compound **5b** (DMSO-*d*<sub>6</sub>, 500 MHz)

<sup>1</sup>H NMR (DMSO-*d*<sub>6</sub>, 500 MHz) δ 8.25 (d, 1H, *J*=8.1 Hz), 7.99 (s, 1H), 7.48-7.44 (m, 3H), 7.41-7.38 (m, 2H), 7.34-7.29 (m, 3H), 7.28-7.25 (m, 1H), 7.23-7.21 (m, 1H), 6.83 (br s, 1H), 5.24 (q, 1H, *J*=7.3 Hz), 3.65 (s, 3H), 2.54-2.52 (m, 2H)

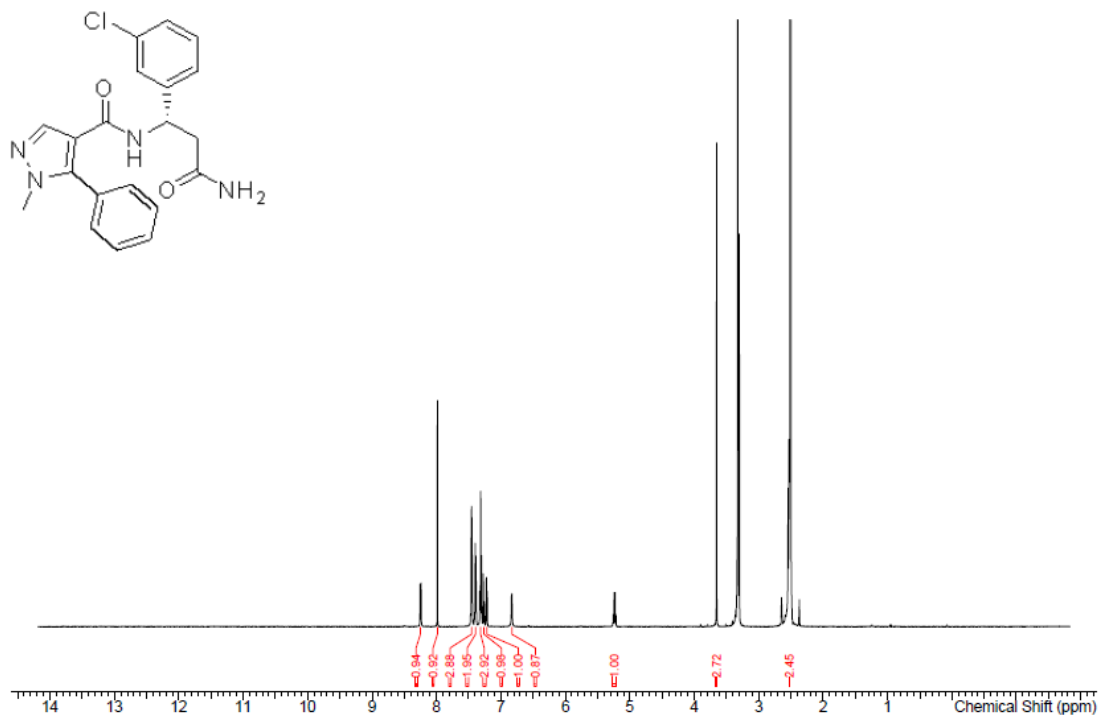

### <sup>1</sup>H NMR Spectra for compound **5c** (DMSO-*d*<sub>6</sub>, 500 MHz)

<sup>1</sup>H NMR (DMSO-*d*<sub>6</sub>, 500 MHz) δ 13.41-13.11 (m, 1H), 8.44 (br s, 1H), 8.19-7.90 (m, 1H), 7.78-7.74 (m, 1H), 7.72-7.62 (m, 2H), 7.40 (br s, 1H), 7.37-7.28 (m, 6H), 7.25-7.20 (m, 1H), 5.37 (q, 1H, *J*=7.5 Hz), 3.30 (s, 3H), 2.60-2.57 (m, 2H)

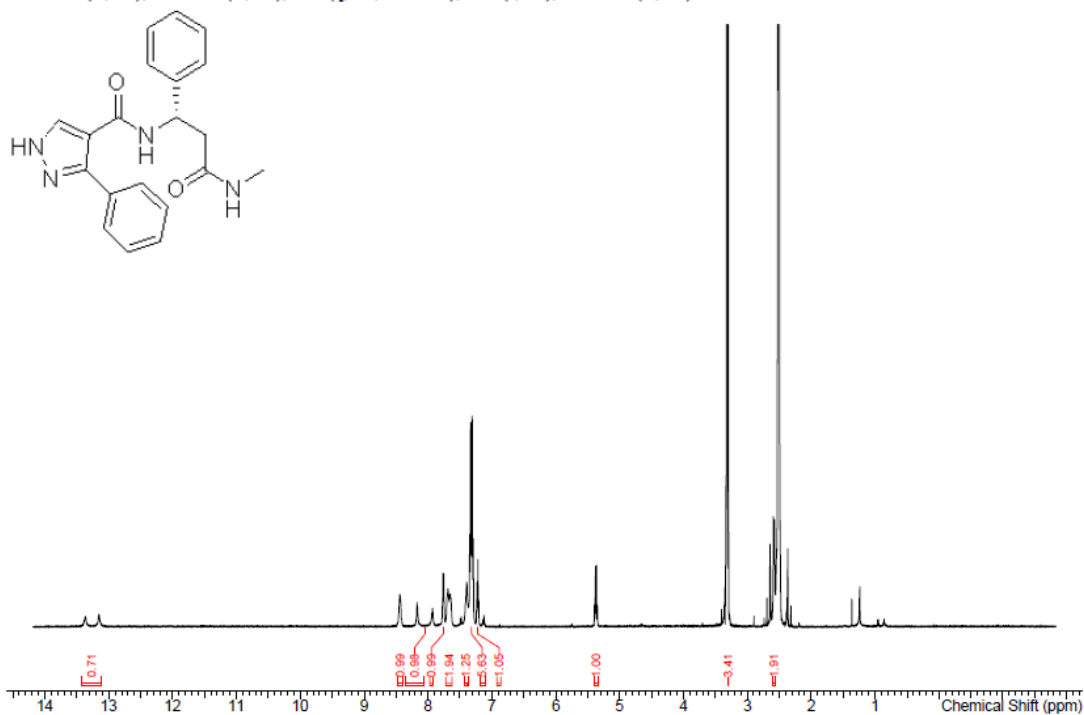

### <sup>1</sup>H NMR Spectra for compound **5d** (DMSO-*d*<sub>6</sub>, 500 MHz)

<sup>1</sup>H NMR (DMSO-*d*<sub>6</sub>, 500 MHz) δ 13.34 (b s, 1H), 8.59 (b s, 1H), 8.36-7.95 (b m, 1H), 7.43-7.27 (m, 6H), 7.14 (b s, 2H), 5.26-5.19 (m, 1H), 3.04-2.90 (m, 2H)

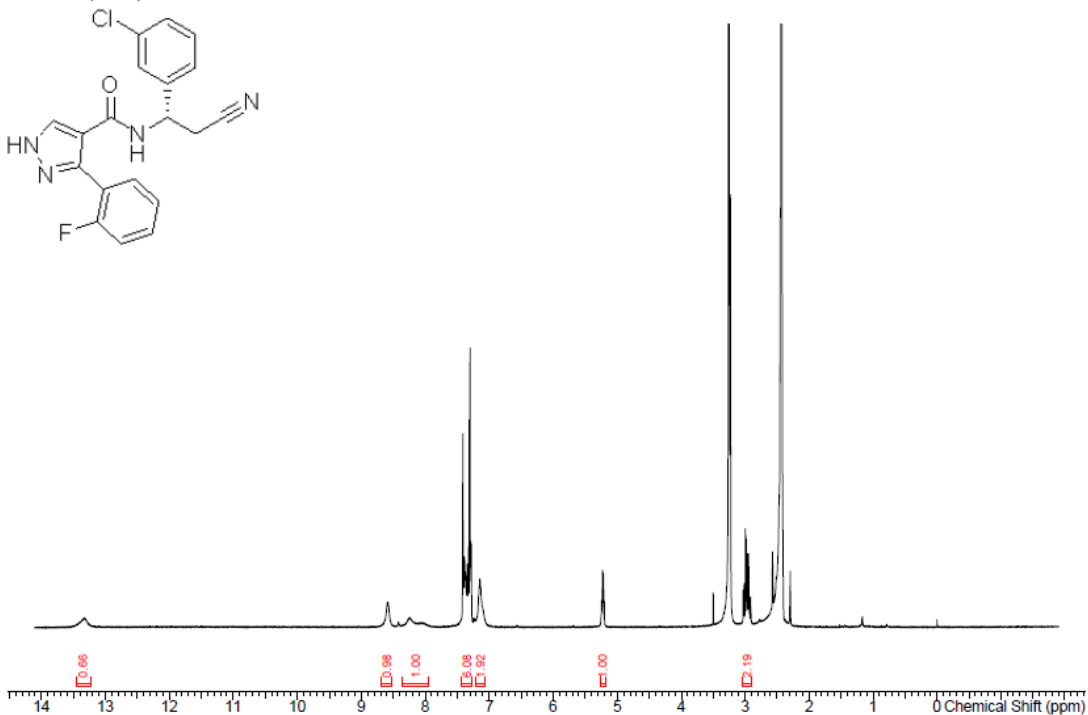

### <sup>1</sup>H NMR Spectra for compound **14a** (DMSO-*d*<sub>6</sub>, 500 MHz)

<sup>1</sup>H NMR (DMSO-*d*<sub>6</sub>, 500 MHz) δ 13.37-13.07 (m, 1H), 8.16-7.86 (m, 2H), 7.80-7.66 (m, 2H), 7.47-7.31 (m, 4H), 6.82 (br s, 1H), 2.31 (t, 2H, *J*=7.2 Hz), 1.29-1.24 (m, 2H)

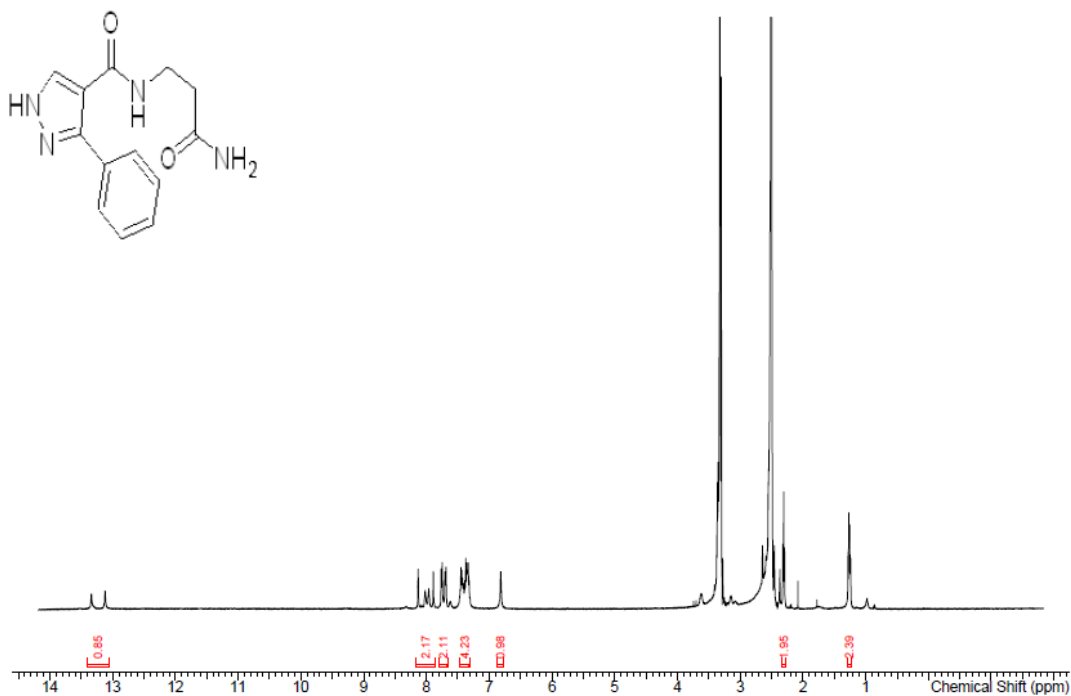

### <sup>1</sup>H NMR Spectra for compound **14b** (DMSO-*d*<sub>6</sub>, 500 MHz)

<sup>1</sup>H NMR (DMSO-*d*<sub>6</sub>, 500 MHz) δ 13.41-13.05 (m, 1H), 8.42 (br s, 1H), 8.21-7.86 (m, 1H), 7.61 (br s, 2H), 7.41 (br d, 1H, *J*=6.8 Hz), 7.36-7.17 (m, 8H), 6.83 (br s, 1H), 5.60-5.53 (m, 1H), 2.52-2.48 (m, 2H)

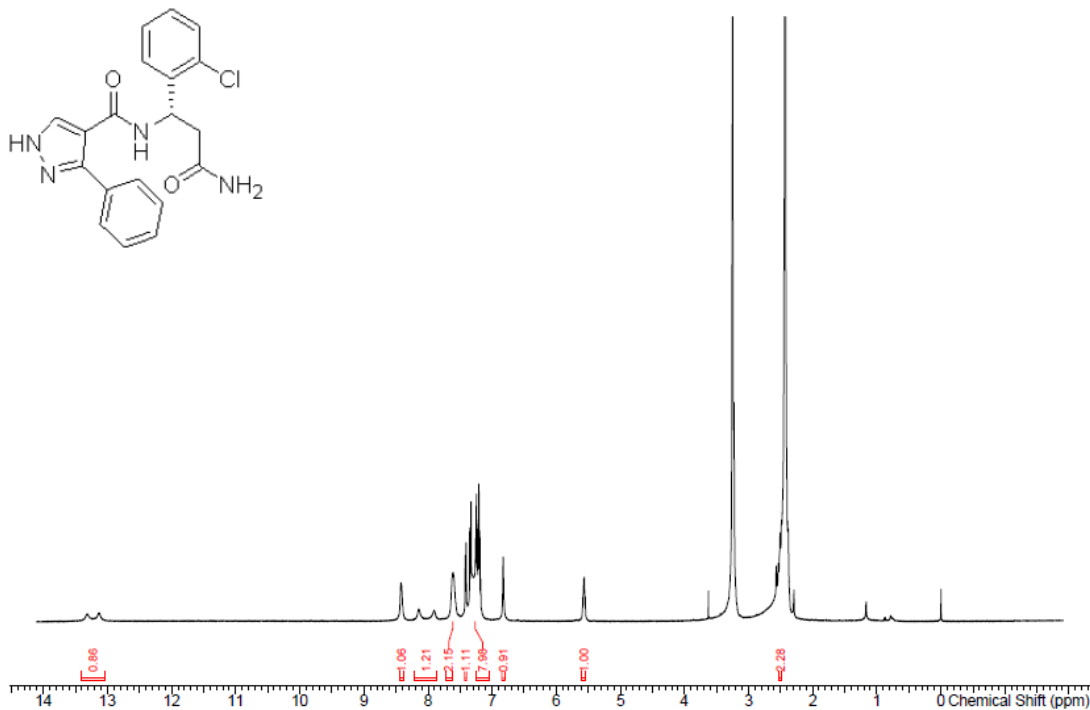

### <sup>1</sup>H NMR Spectra for compound **14c** (DMSO-*d*<sub>6</sub>, 500 MHz)

<sup>1</sup>H NMR (DMSO-*d*<sub>6</sub>, 500 MHz) δ 13.40-13.04 (m, 1H), 8.42 (br d, 1H, *J*=8.1 Hz), 8.18-7.82 (m, 1H), 7.58 (br s, 2H), 7.35-7.19 (m, 8H), 6.79 (br s, 1H), 5.27 (q, 1H, *J*=7.5 Hz), 2.53-2.50 (m, 2H)

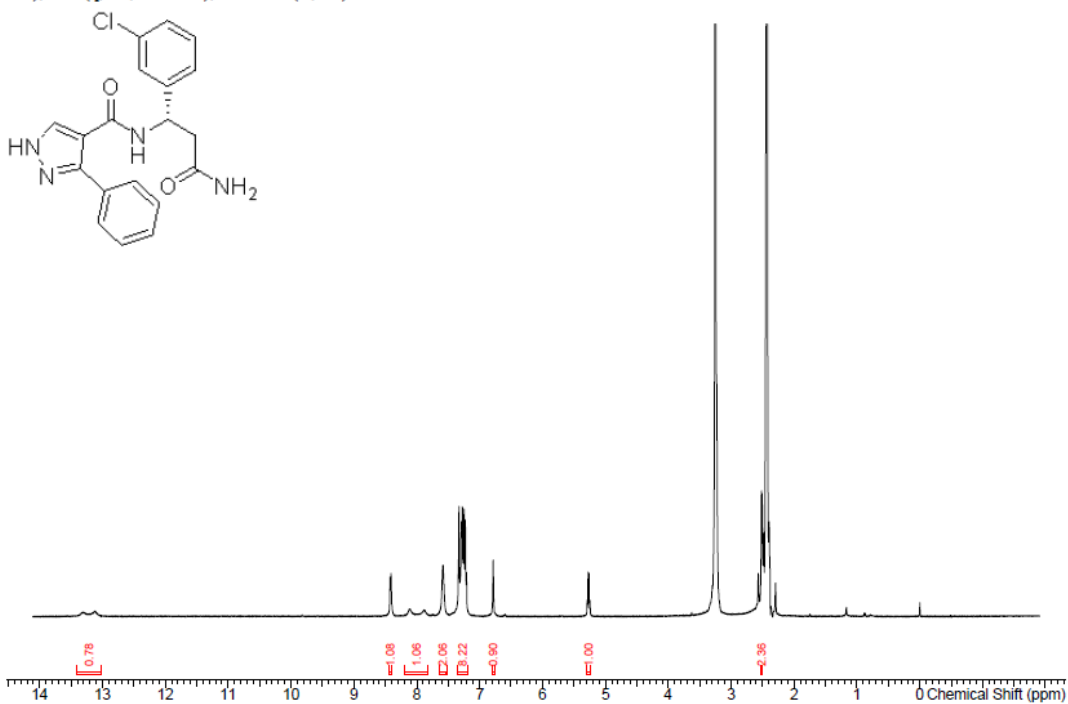

### <sup>1</sup>H NMR Spectra for compound **14d** (DMSO-*d*<sub>6</sub>, 500 MHz)

<sup>1</sup>H NMR (DMSO-*d*<sub>6</sub>, 500 MHz) δ 13.35-13.05 (m, 1H), 8.40 (br d, 1H, *J*=7.9 Hz), 8.16-7.83 (m, 1H), 7.59 (br s, 2H), 7.36-7.22 (m, 8H), 6.77 (br s, 1H), 5.26 (q, 1H, *J*=7.5 Hz), 2.52-2.49 (m, 2H)

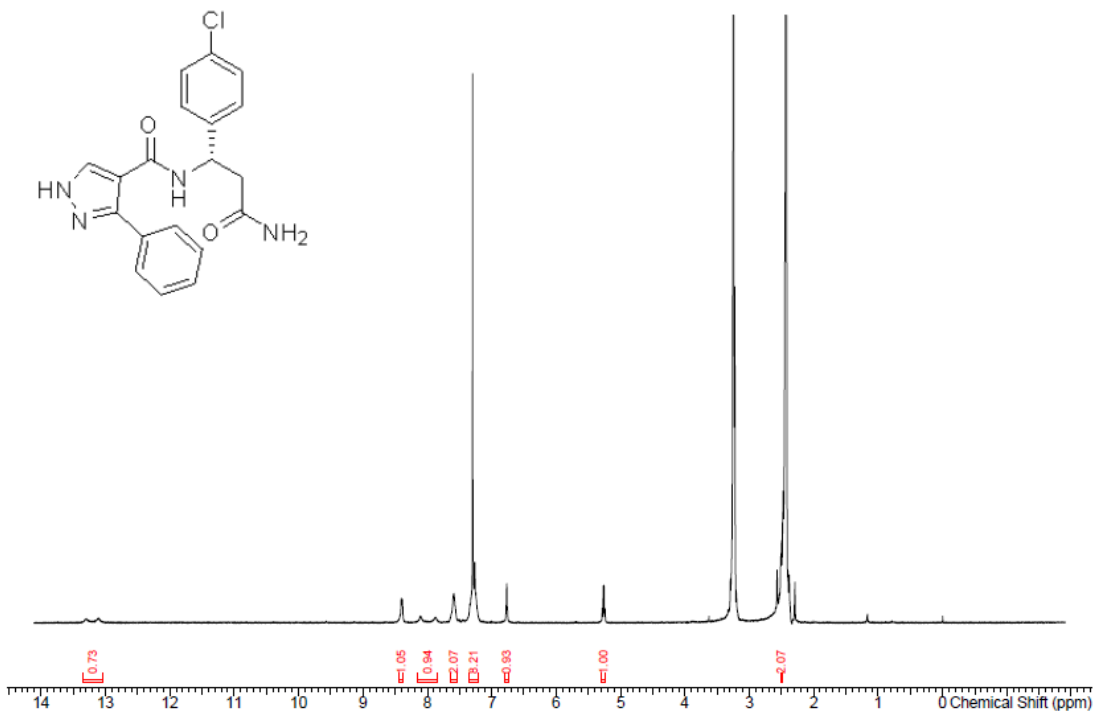

### <sup>1</sup>H NMR Spectra for compound **14e** (DMSO-*d*<sub>6</sub>, 500 MHz)

<sup>1</sup>H NMR (DMSO-*d*<sub>6</sub>, 500 MHz) δ 13.36-13.04 (m, 1H), 8.33 (br s, 1H), 8.15-7.84 (m, 1H), 7.65-7.54 (m, 2H), 7.39-7.17 (m, 6H), 7.12-7.03 (m, 2H), 6.78 (br s, 1H), 5.55-5.48 (m, 1H), 2.50-2.46 (m, 2H)

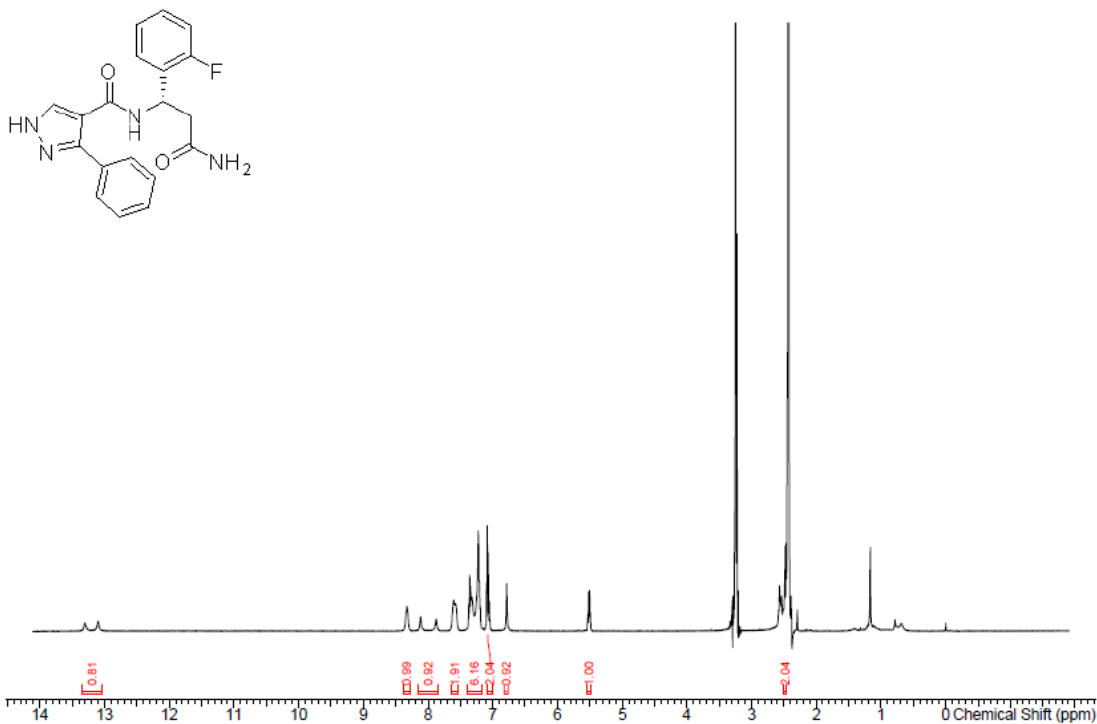

### <sup>1</sup>H NMR Spectra for compound **14f** (DMSO-*d*<sub>6</sub>, 500 MHz)

<sup>1</sup>H NMR (DMSO-*d*<sub>6</sub>, 500 MHz) δ 13.33-13.07 (m, 1H), 8.39 (br dd, 1H, *J*=8.7, 11.4 Hz), 8.15-7.84 (m, 1H), 7.64-7.54 (m, 2H), 7.36-7.21 (m, 5H), 7.14-7.06 (m, 2H), 7.02-6.95 (m, 1H), 6.78 (br s, 1H), 5.30 (q, 1H, *J*=7.6 Hz), 2.51 (br t, 2H, *J*=6.6 Hz)

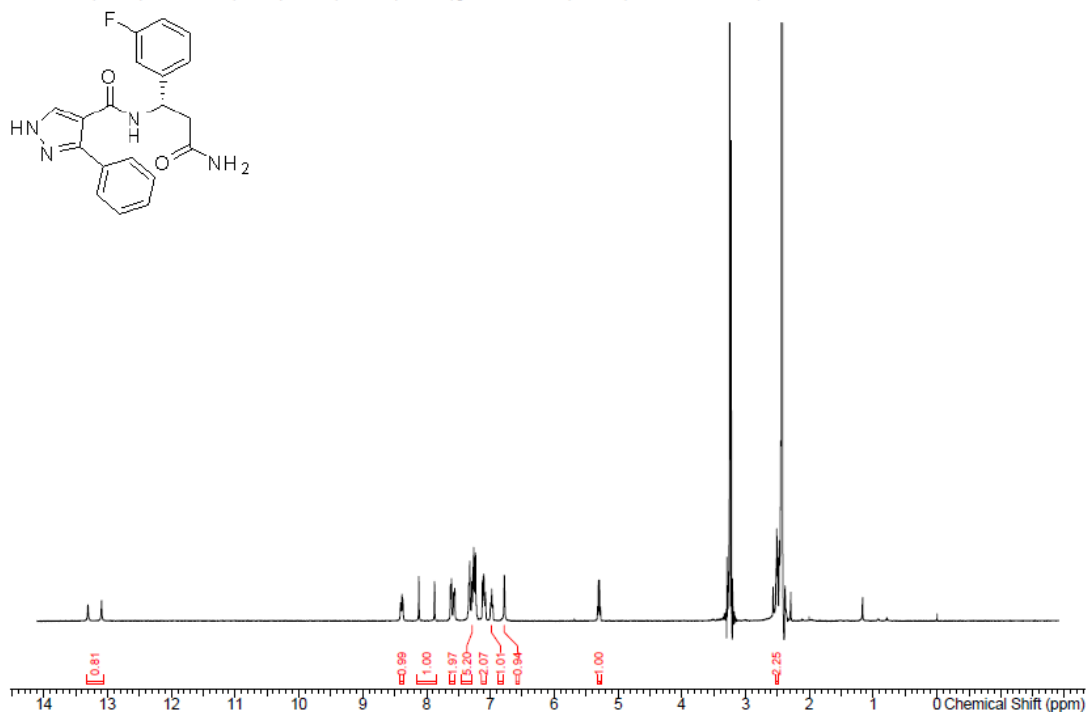



### <sup>1</sup>H NMR Spectra for compound **14g** (DMSO-*d*<sub>6</sub>, 500 MHz)

<sup>1</sup>H NMR (DMSO-*d*<sub>6</sub>, 500 MHz) δ 13.36-13.04 (m, 1H), 8.37 (br s, 1H), 8.13-7.83 (m, 1H), 7.65-7.55 (m, 2H), 7.37-7.21 (m, 6H), 7.06 (t, 2H, *J*=8.9 Hz), 6.76 (br s, 1H), 5.28 (q, 1H, *J*=7.6 Hz), 2.51-2.48 (m, 2H)

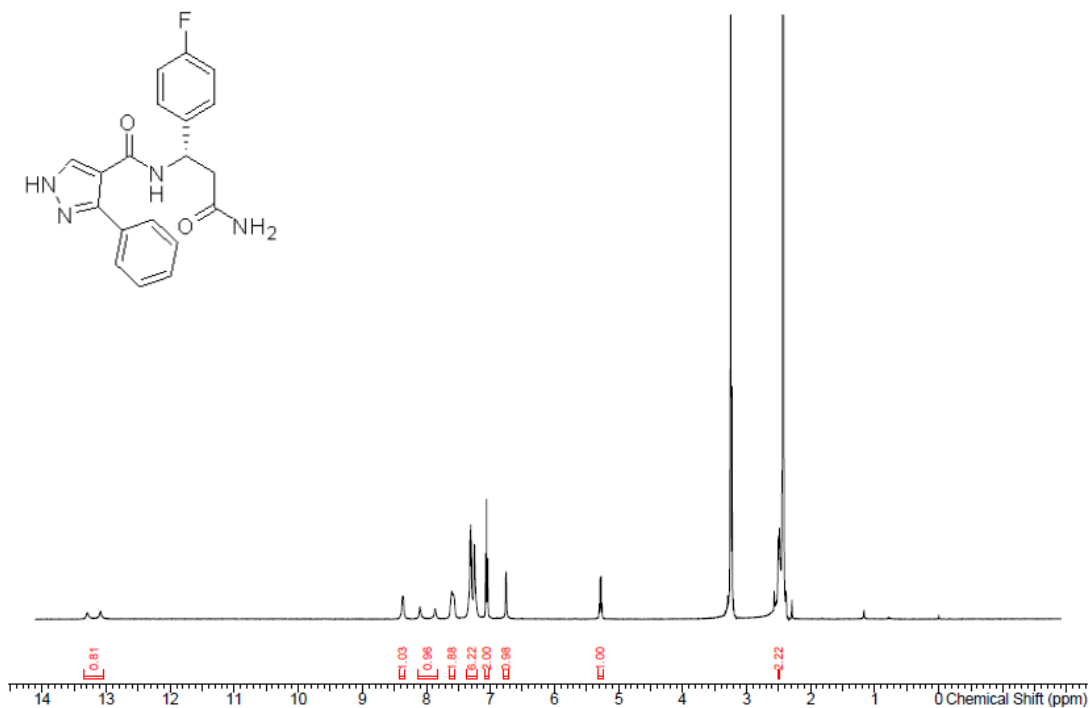

### <sup>1</sup>H NMR Spectra for compound **14h** (DMSO-*d*<sub>6</sub>, 500 MHz)

<sup>1</sup>H NMR (DMSO-*d*<sub>6</sub>, 500 MHz) δ 13.33-13.07 (m, 1H), 8.18-7.84 (m, 2H), 7.65-7.56 (m, 2H), 7.37-7.22 (m, 3H), 7.21-7.08 (m, 3H), 6.89 (d, 1H, *J*=8.1 Hz), 6.81 (t, 1H, *J*=7.3 Hz), 6.74 (br s, 1H), 5.54-5.48 (m, 1H), 3.71 (s, 3H), 2.48-2.45 (m, 2H)

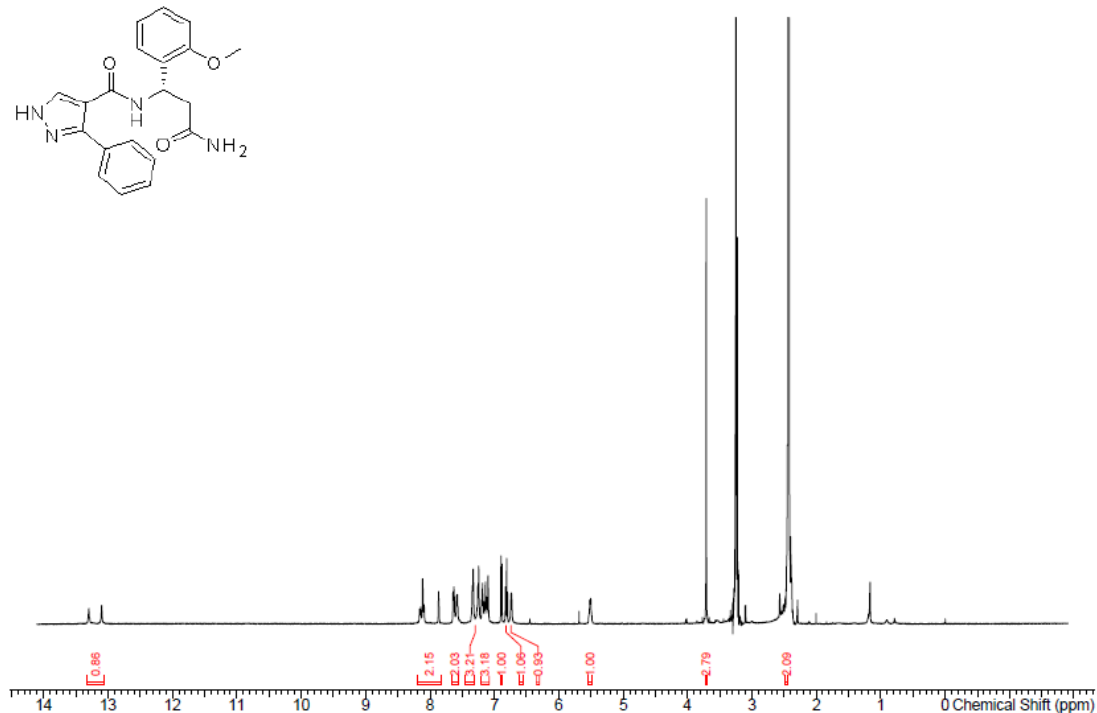

### <sup>1</sup>H NMR Spectra for compound **14i** (DMSO-*d*<sub>6</sub>, 500 MHz)

<sup>1</sup>H NMR (DMSO-*d*<sub>6</sub>, 500 MHz) δ 13.33-13.05 (m, 1H), 8.33 (br dd, 1H, *J*=8.4, 14.6 Hz), 8.11-7.84 (m, 1H), 7.66-7.56 (m, 2H), 7.36-7.21 (m, 4H), 7.15 (t, 1H, *J*=7.8 Hz), 6.88-6.70 (m, 4H), 5.27 (q, 1H, *J*=7.5 Hz), 3.66 (s, 3H), 2.50-2.47 (m, 2H, *J*=6.5 Hz)

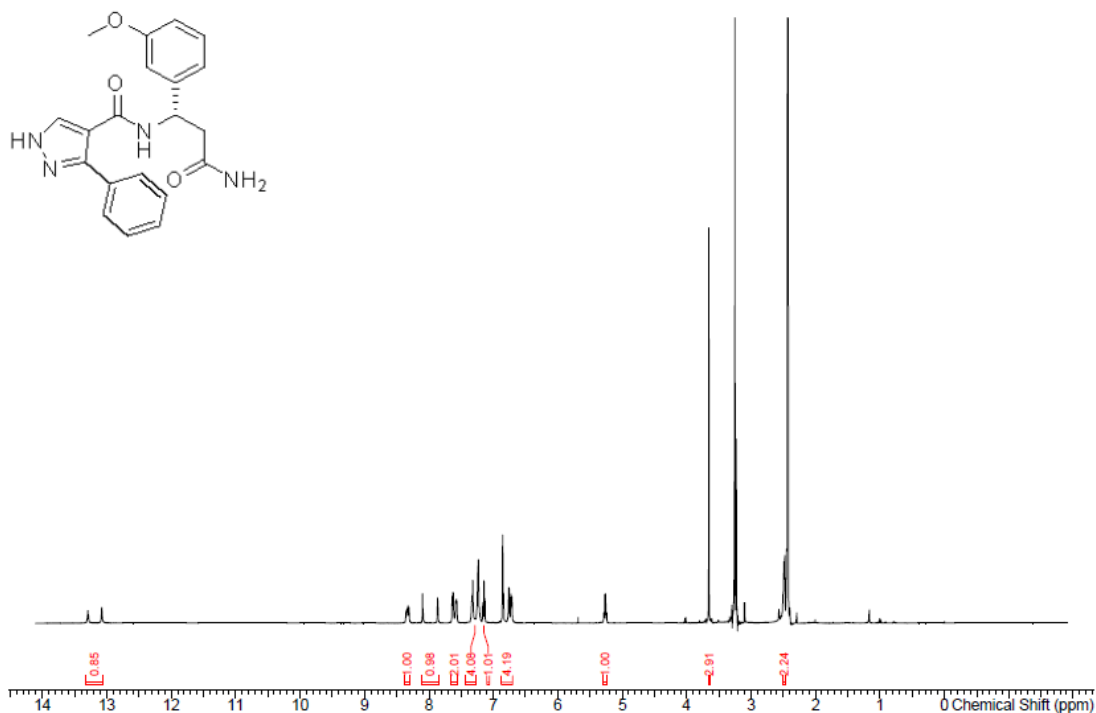

### <sup>1</sup>H NMR Spectra for compound **14j** (DMSO-*d*<sub>6</sub>, 500 MHz)

<sup>1</sup>H NMR (DMSO-*d*<sub>6</sub>, 500 MHz) δ 13.36-13.00 (m, 1H), 8.28 (br d, 1H, *J*=8.2 Hz), 8.15-7.81 (m, 1H), 7.60 (br s, 2H), 7.37-7.17 (m, 6H), 6.82-6.77 (m, 2H), 6.72 (br s, 1H), 5.24 (q, 1H, *J*=7.5 Hz), 3.65 (s, 3H), 2.49-2.46 (m, 2H)

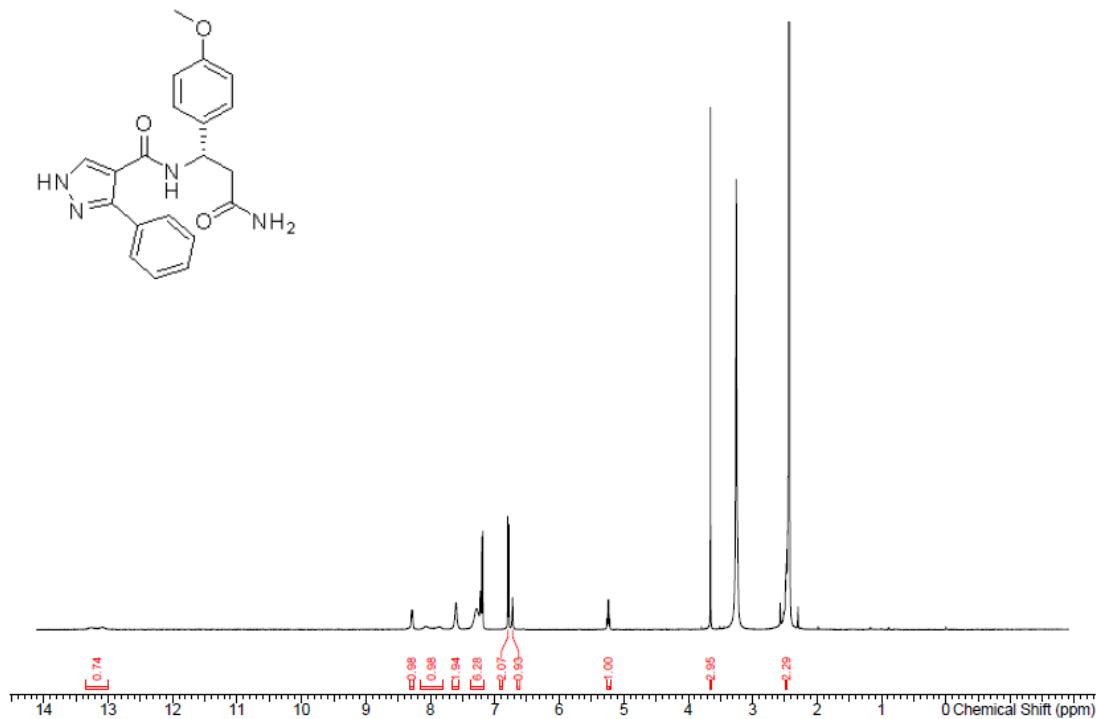

### $^1\text{H}$ NMR Spectra for compound **15a** (DMSO- $d_6$ , 500 MHz)

$^1\text{H}$  NMR (DMSO- $d_6$ , 500 MHz)  $\delta$  12.81-12.59 (m, 1H), 8.22-7.81 (m, 2H), 7.32-7.20 (m, 5H), 7.17-7.11 (m, 1H), 6.75 (br s, 1H), 5.29 (q, 1H,  $J=7.5$  Hz), 2.52 (br d, 2H,  $J=6.7$  Hz), 2.32-2.21 (m, 3H)

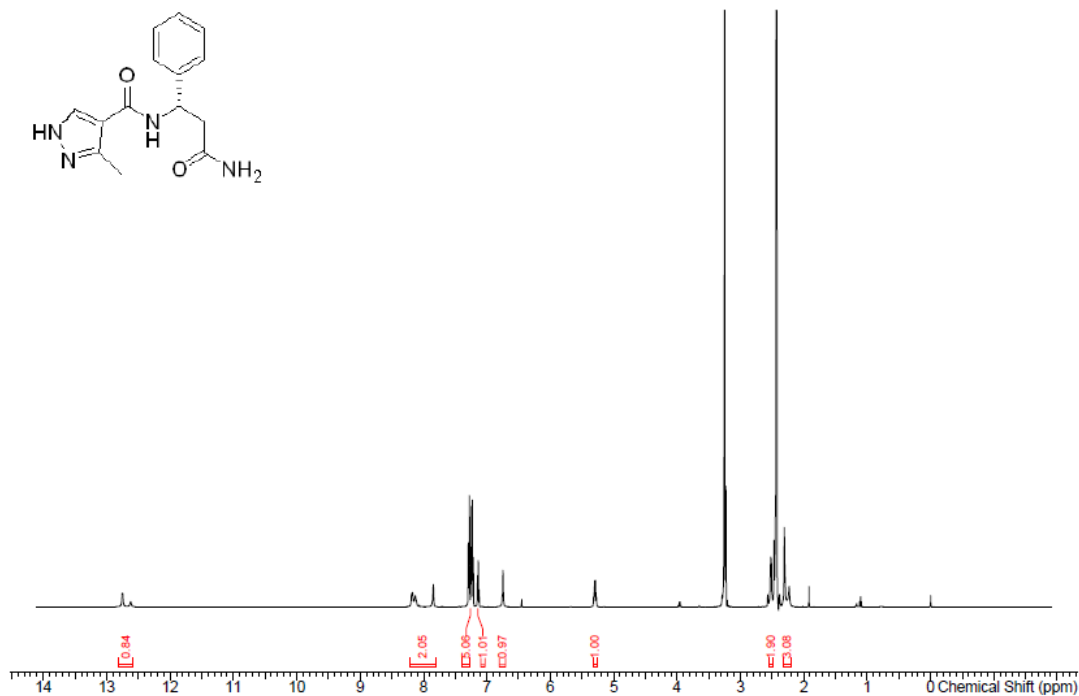

### $^1\text{H}$ NMR Spectra for compound **15b** (DMSO- $d_6$ , 500 MHz)

$^1\text{H}$  NMR (DMSO- $d_6$ , 500 MHz)  $\delta$  13.22 (br s, 1H), 8.16 (br s, 2H), 7.45-7.17 (m, 9H), 7.13 (br d, 1H,  $J=5.7$  Hz), 6.72 (br s, 1H), 5.19 (q, 1H,  $J=7.4$  Hz), 2.47 (br d, 2H,  $J=6.4$  Hz)

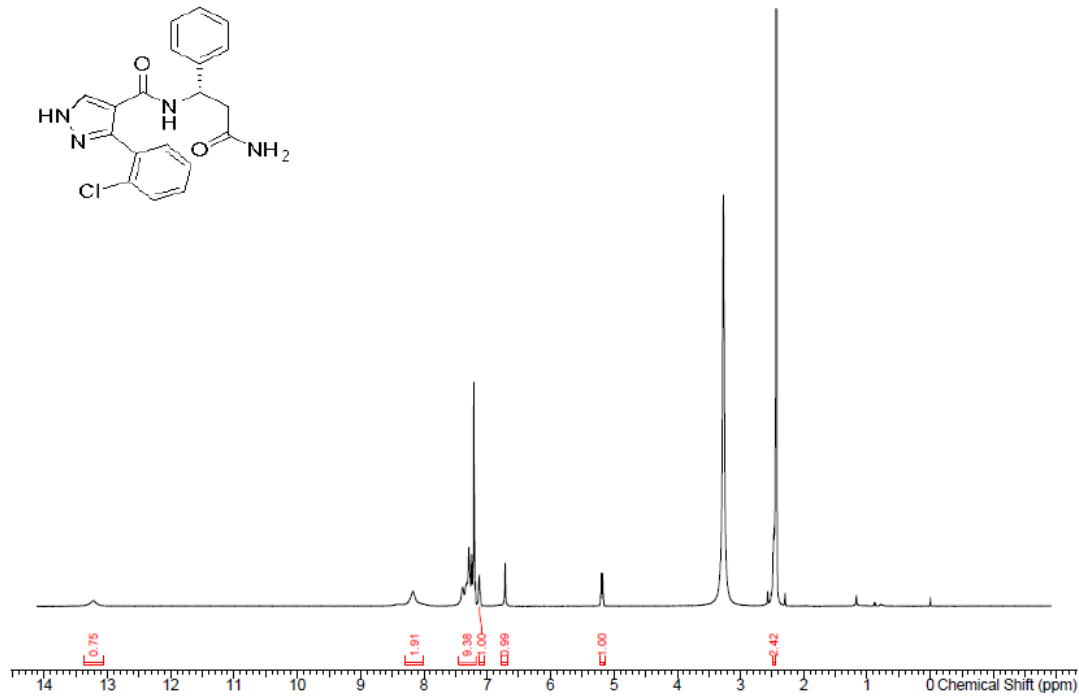

### <sup>1</sup>H NMR Spectra for compound **15c** (DMSO-*d*<sub>6</sub>, 500 MHz)

<sup>1</sup>H NMR (DMSO-*d*<sub>6</sub>, 500 MHz) δ 13.57-13.21 (m, 1H), 8.51 (br d, 1H, *J*=8.2 Hz), 8.31-7.77 (m, 2H), 7.67 (br s, 1H), 7.44-7.28 (m, 7H), 7.25-7.20 (m, 1H), 6.83 (br s, 1H), 5.38 (q, 1H, *J*=7.5 Hz), 2.59 (br d, 2H, *J*=7.3 Hz)

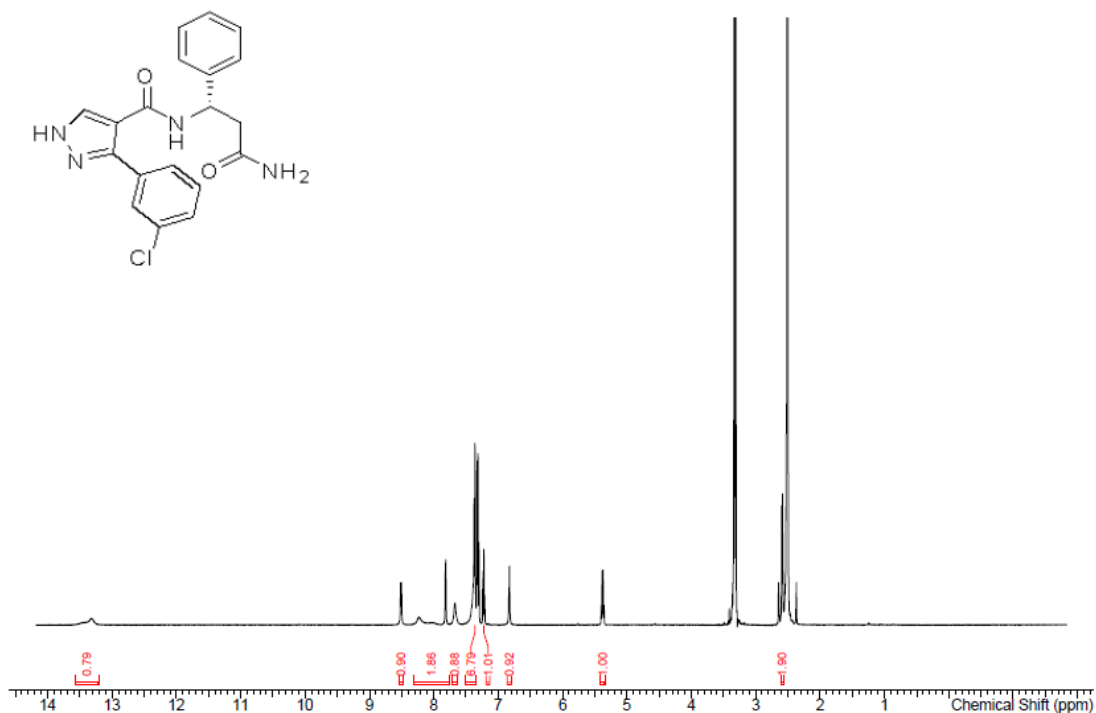

### <sup>1</sup>H NMR Spectra for compound **15d** (DMSO-*d*<sub>6</sub>, 500 MHz)

<sup>1</sup>H NMR (DMSO-*d*<sub>6</sub>, 500 MHz) δ 13.50-13.21 (m, 1H), 8.53-8.46 (m, 1H), 8.28-7.95 (m, 1H), 7.80-7.45 (m, 3H), 7.41-7.29 (m, 6H), 7.26-7.20 (m, 1H), 6.84 (br s, 1H), 5.38 (q, 1H, *J*=7.5 Hz), 2.58 (br d, 2H, *J*=7.2 Hz)

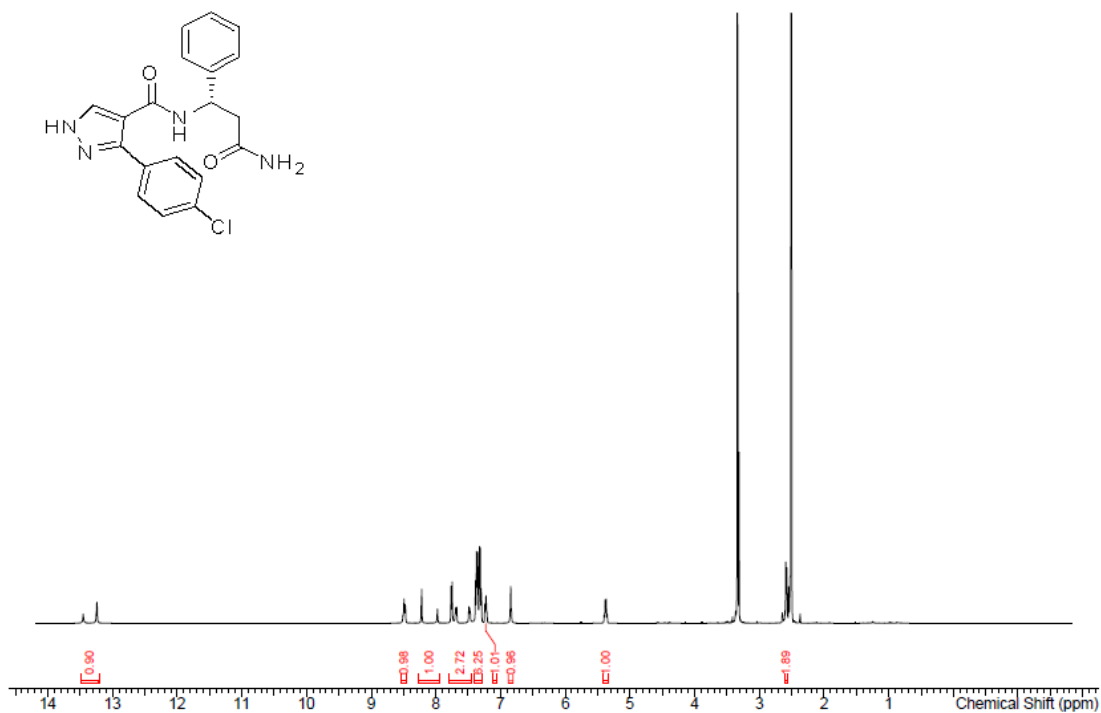

### <sup>1</sup>H NMR Spectra for compound **15e** (DMSO-*d*<sub>6</sub>, 500 MHz)

<sup>1</sup>H NMR (DMSO-*d*<sub>6</sub>, 500 MHz) δ 13.43-13.22 (m, 1H), 8.44-8.00 (m, 2H), 7.43 (br s, 2H), 7.34-7.12 (m, 8H), 6.80 (br s, 1H), 5.30 (q, 1H, *J*=7.3 Hz), 2.56 (br d, 2H, *J*=6.8 Hz)

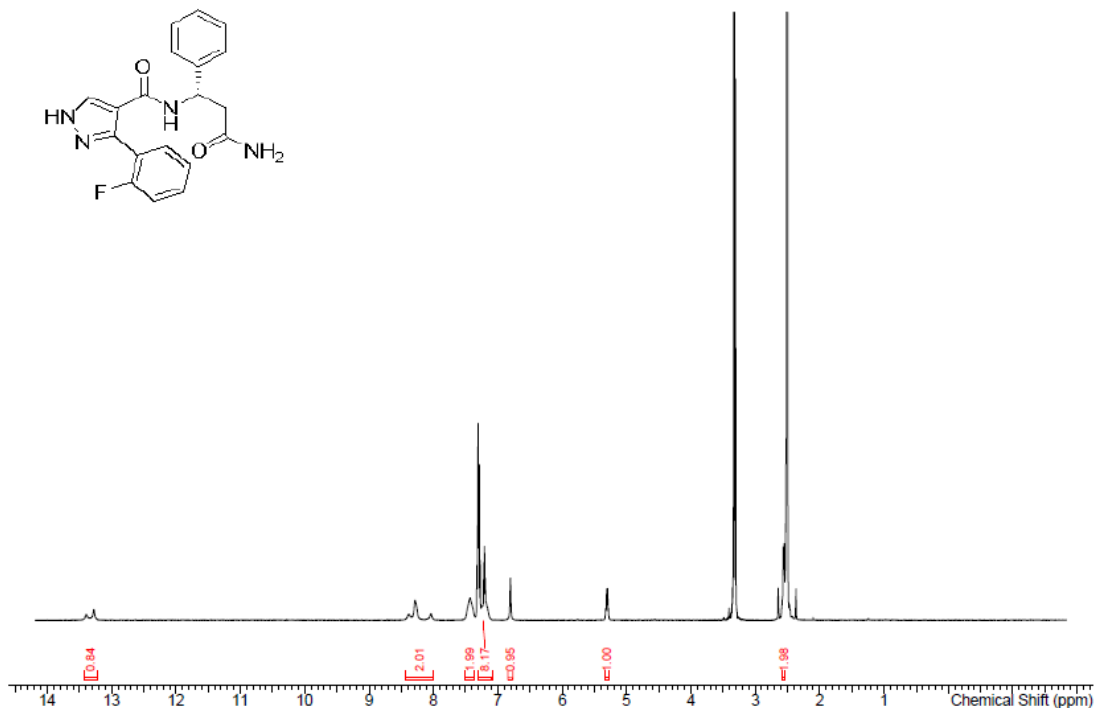

### <sup>1</sup>H NMR Spectra for compound **15f** (DMSO-*d*<sub>6</sub>, 500 MHz)

<sup>1</sup>H NMR (DMSO-*d*<sub>6</sub>, 500 MHz) δ 13.52-13.10 (m, 1H), 8.45 (br d, 1H, *J*=7.7 Hz), 8.22-7.86 (m, 1H), 7.55-7.43 (m, 2H), 7.32-7.20 (m, 6H), 7.18-7.03 (m, 2H), 6.75 (br s, 1H), 5.30 (q, 1H, *J*=7.5 Hz), 2.51 (br dd, 2H, *J*=3.5, 6.8 Hz)

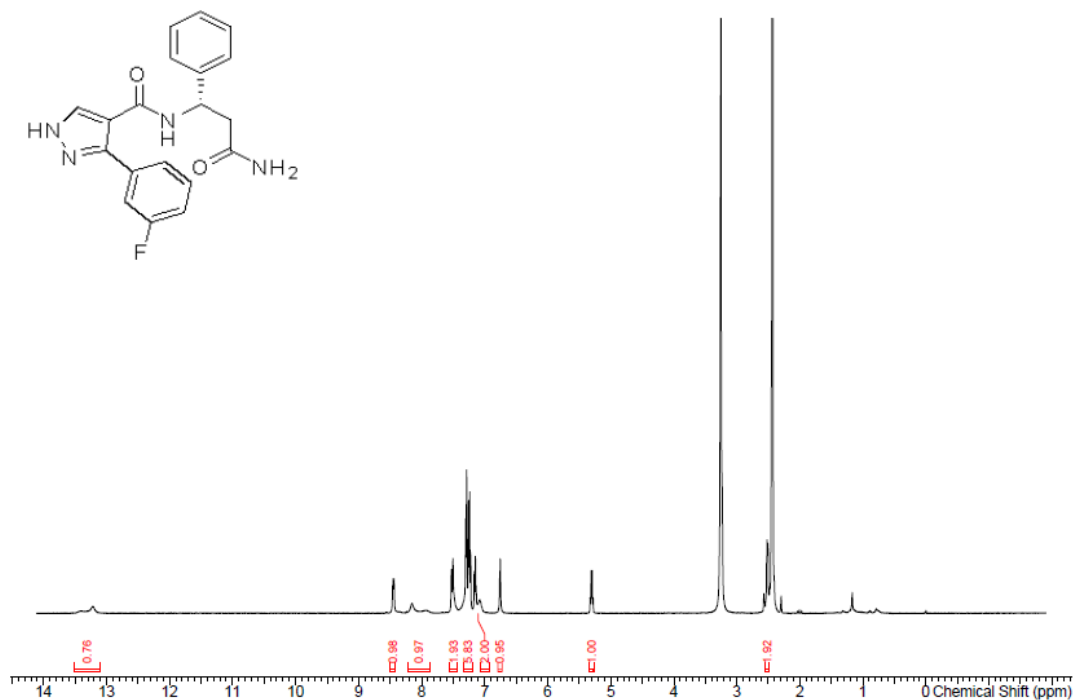

<sup>1</sup>H NMR Spectra for compound **15g** (DMSO-*d*<sub>6</sub>, 500 MHz)

<sup>1</sup>H NMR (DMSO-*d*<sub>6</sub>, 500 MHz) δ 13.44-13.12 (m, 1H), 8.45 (br d, 1H, *J*=8.1 Hz), 8.26-7.92 (m, 1H), 7.75 (br s, 2H), 7.38-7.29 (m, 5H), 7.26-7.11 (m, 3H), 6.84 (br s, 1H), 5.37 (q, 1H, *J*=7.5 Hz), 2.60-2.56 (m, 2H)

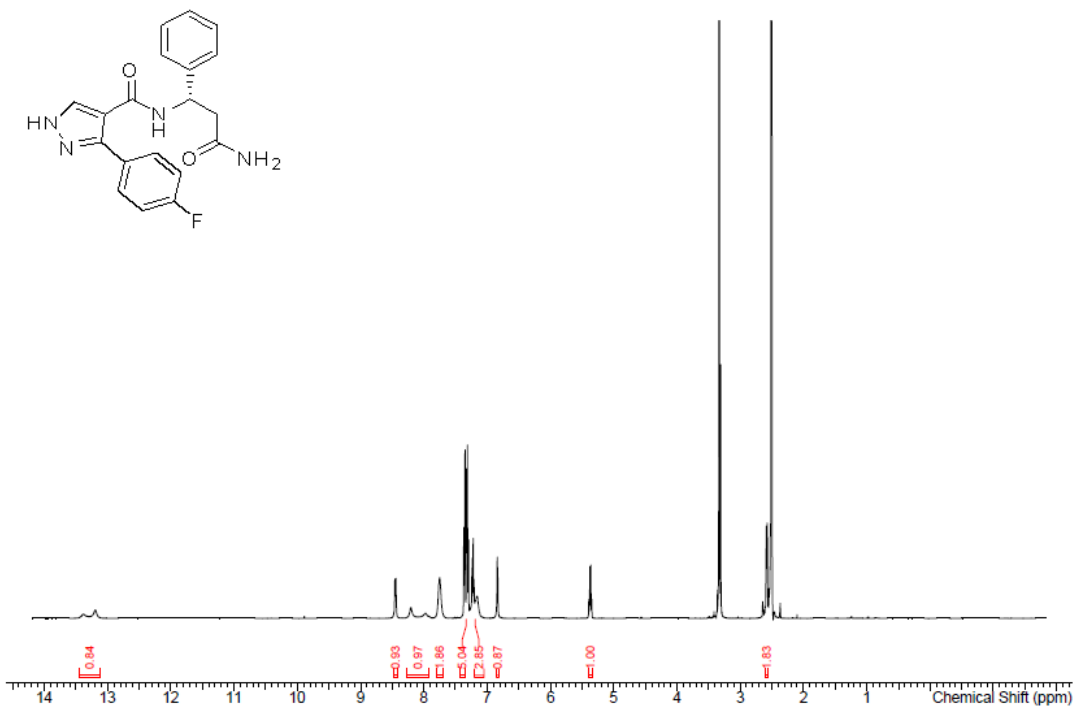

<sup>1</sup>H NMR Spectra for compound **15h** (DMSO-*d*<sub>6</sub>, 500 MHz)

<sup>1</sup>H NMR (DMSO-*d*<sub>6</sub>, 500 MHz) δ 13.27-13.03 (m, 1H), 8.41-8.34 (m, 1H), 8.18-7.88 (m, 1H), 7.69-7.59 (m, 2H), 7.38-7.28 (m, 5H), 7.25-7.19 (m, 1H), 7.00-6.81 (m, 3H), 5.36 (q, 1H, *J*=7.6 Hz), 3.78 (br d, 3H, *J*=10.0 Hz), 2.57 (br d, 2H, *J*=6.8 Hz)

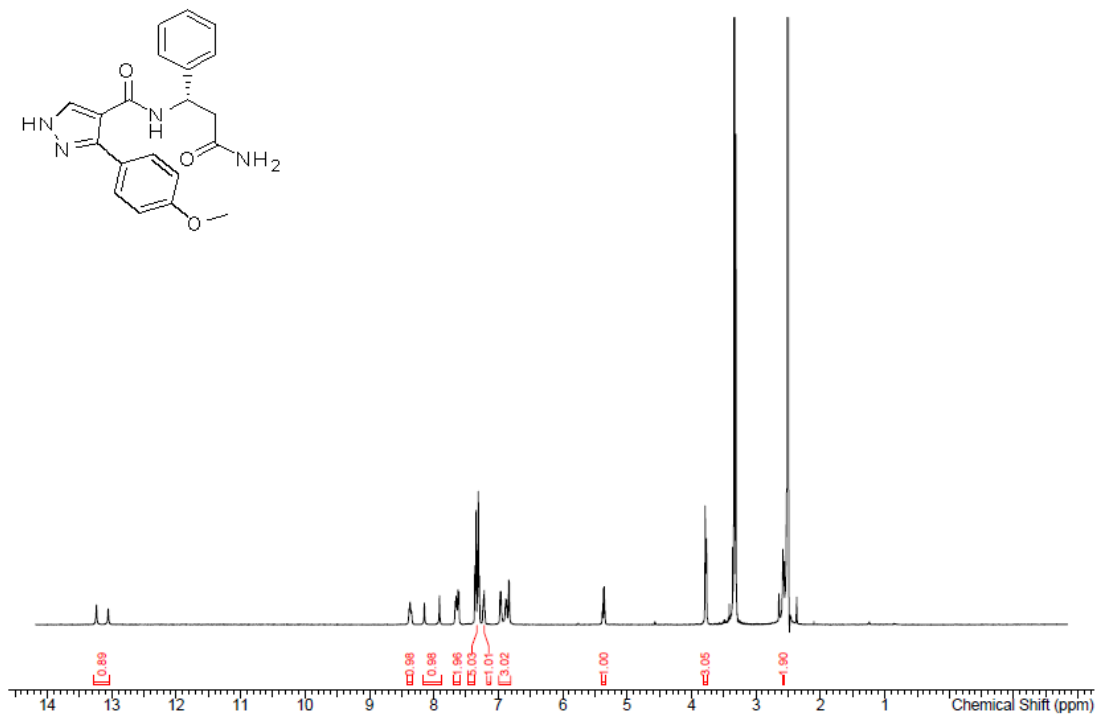

### $^1\text{H}$ NMR Spectra for compound **15i** (DMSO- $d_6$ , 500 MHz)

$^1\text{H}$  NMR (DMSO- $d_6$ , 500 MHz)  $\delta$  13.61-13.36 (m, 1H), 8.54 (br d, 1H,  $J=7.8$  Hz), 8.33-7.95 (m, 3H), 7.92-7.74 (m, 1H), 7.67-7.52 (m, 1H), 7.41-7.29 (m, 5H), 7.26-7.20 (m, 1H), 6.83 (br s, 1H), 5.39 (q, 1H,  $J=7.6$  Hz), 2.59 (br d, 2H,  $J=7.2$  Hz)

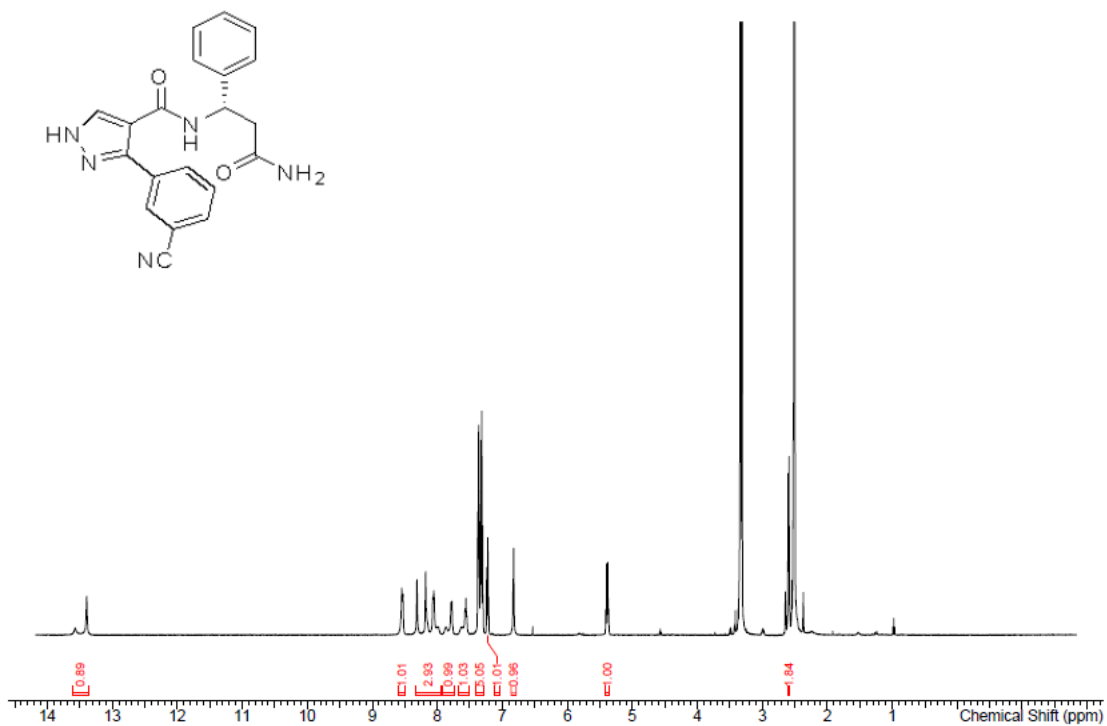

### $^1\text{H}$ NMR Spectra for compound **15j** (DMSO- $d_6$ , 500 MHz)

$^1\text{H}$  NMR (DMSO- $d_6$ , 500 MHz)  $\delta$  13.31 (br s, 1H), 8.45 (br d, 1H,  $J=8.2$  Hz), 8.25-8.02 (m, 1H), 7.91 (br d, 1H,  $J=6.8$  Hz), 7.83-7.61 (m, 1H), 7.42-7.20 (m, 6H), 7.18-7.13 (m, 1H), 6.76 (br s, 1H), 5.31 (q, 1H,  $J=7.4$  Hz), 2.51 (br d, 2H,  $J=6.1$  Hz)

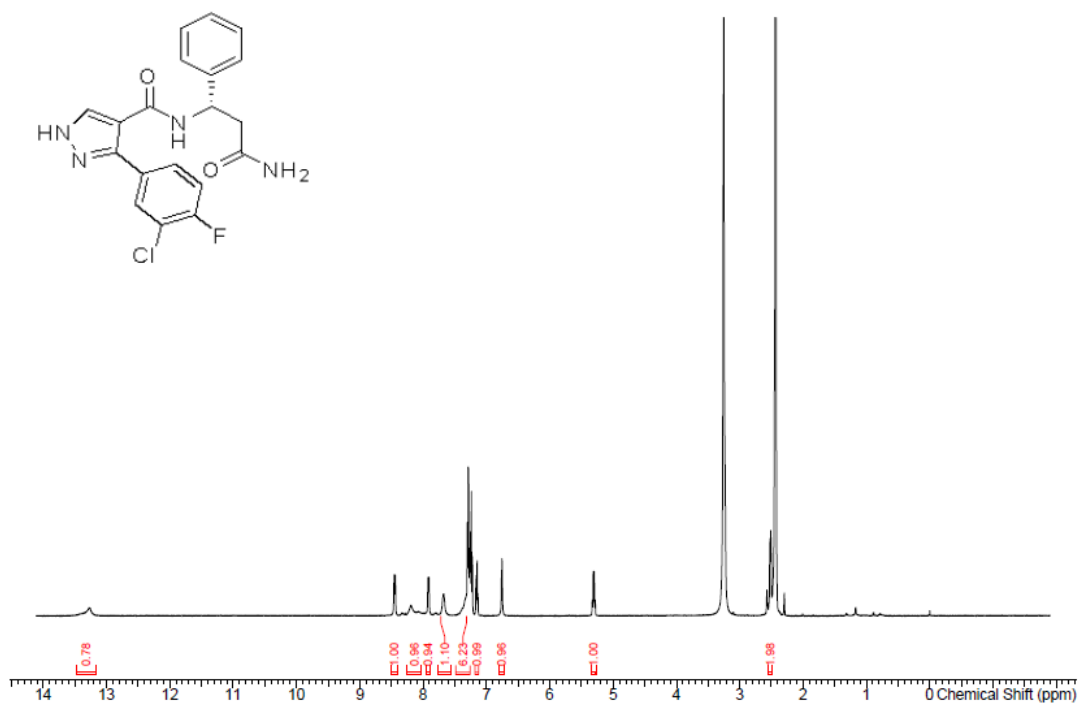

<sup>1</sup>H NMR Spectra for compound **26a** (DMSO-*d*<sub>6</sub>, 500 MHz)

<sup>1</sup>H NMR (DMSO-*d*<sub>6</sub>, 500 MHz) δ 13.64-13.04 (m, 1H), 8.38 (br s, 1H), 8.14 (br s, 1H), 7.49 (dd, 1H, *J*=2.0, 7.2 Hz), 7.47-7.40 (m, 2H), 7.38-7.28 (m, 3H), 7.26-7.16 (m, 2H), 6.85 (br s, 1H), 5.27 (q, 1H, *J*=7.5 Hz), 2.57 (br dd, 2H, *J*=1.9, 7.3 Hz)

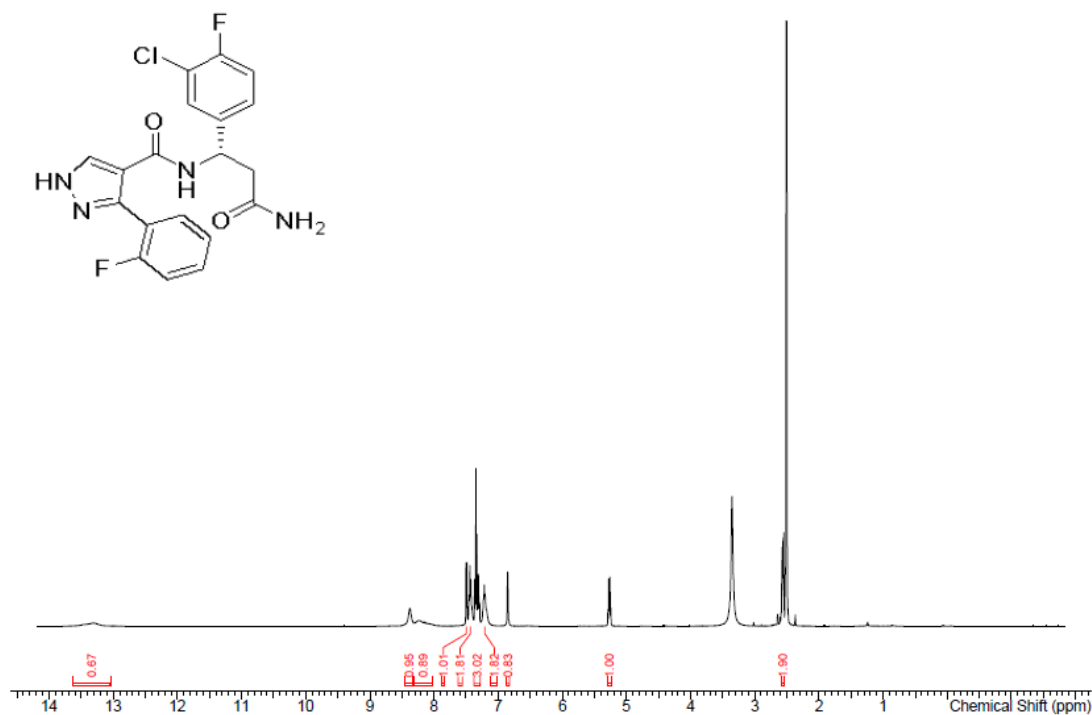

<sup>1</sup>H NMR Spectra for compound **26b** (DMSO-*d*<sub>6</sub>, 500 MHz)

<sup>1</sup>H NMR (DMSO-*d*<sub>6</sub>, 500 MHz) δ 13.39-13.20 (m, 1H), 8.42-8.26 (m, 1H), 8.24-7.92 (m, 1H), 7.51-7.46 (m, 2H), 7.43-7.26 (m, 3H), 7.24-7.04 (m, 3H), 6.79 (br s, 1H), 5.21-5.15 (m, 1H), 2.49 (br d, 2H, *J*=6.2 Hz)

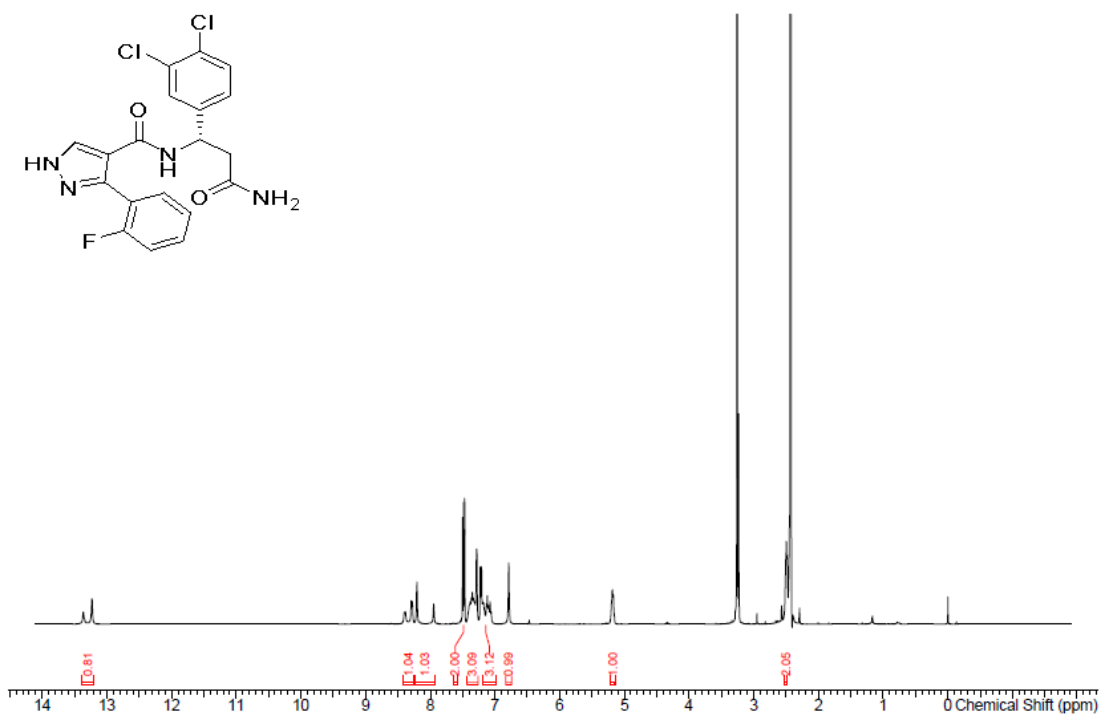



### <sup>1</sup>H NMR Spectra for compound **26c** (DMSO-*d*<sub>6</sub>, 500 MHz)

<sup>1</sup>H NMR (DMSO-*d*<sub>6</sub>, 500 MHz) δ 13.32 (br s, 1H), 8.36-8.18 (m, 1H), 7.40 (br s, 1H), 7.29-7.23 (m, 3H), 7.22-7.18 (m, 2H), 7.05 (br s, 1H), 6.77 (br s, 1H), 5.21 (q, 1H, *J*=7.4 Hz), 2.49 (br d, 2H, *J*=7.3 Hz)

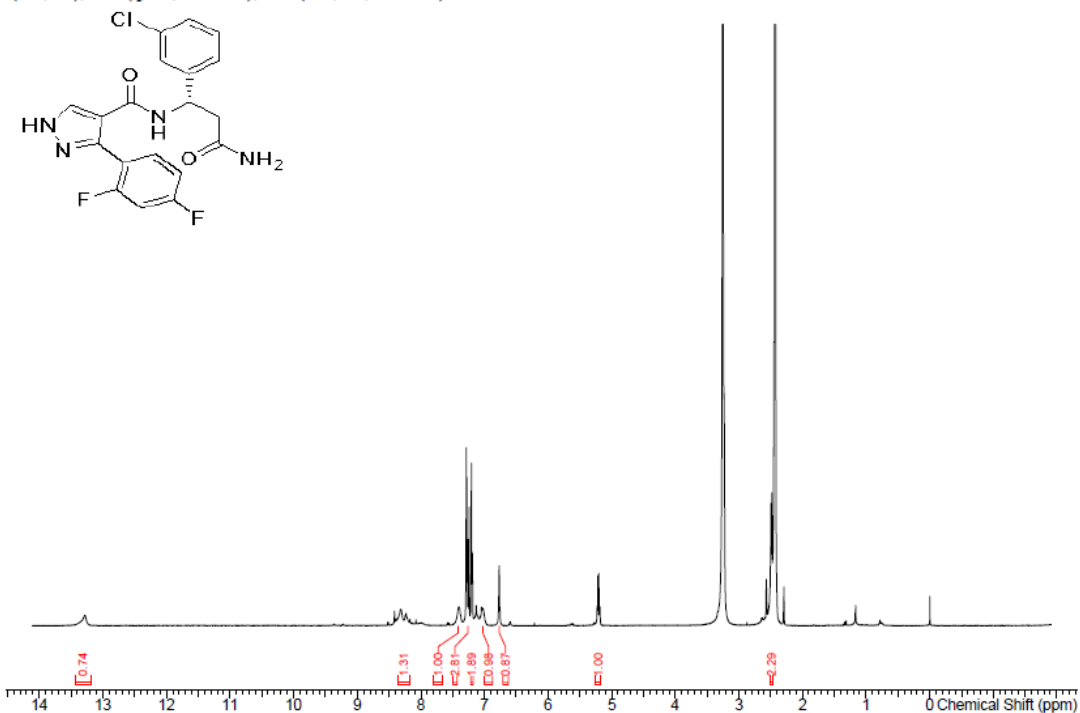

### <sup>1</sup>H NMR Spectra for compound **26d** (DMSO-*d*<sub>6</sub>, 500 MHz)

<sup>1</sup>H NMR (DMSO-*d*<sub>6</sub>, 500 MHz) δ 13.46-13.24 (m, 1H), 8.33 (br s, 1H), 8.27-7.94 (m, 1H), 7.38 (br s, 1H), 7.31-7.17 (m, 6H), 6.77 (br s, 1H), 5.21 (q, 1H, *J*=7.5 Hz), 2.49 (br dd, 2H, *J*=3.2, 7.3 Hz)

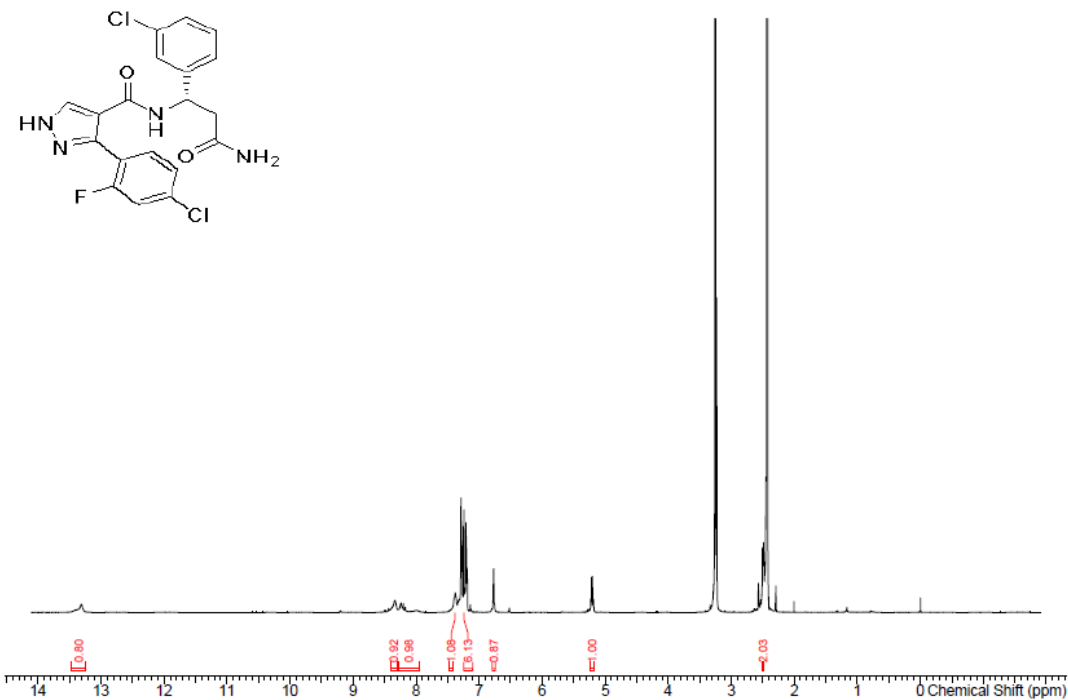

### <sup>1</sup>H NMR Spectra for compound **26e** (DMSO-*d*<sub>6</sub>, 500 MHz)

<sup>1</sup>H NMR (DMSO-*d*<sub>6</sub>, 500 MHz) δ 13.54-13.30 (m, 1H), 8.40 (br s, 1H), 8.34-8.01 (m, 1H), 7.52-7.43 (m, 2H), 7.42-7.25 (m, 5H), 6.85 (br s, 1H), 5.27 (q, 1H, *J*=7.5 Hz), 2.57 (br dd, 2H, *J*=2.8, 7.2 Hz)

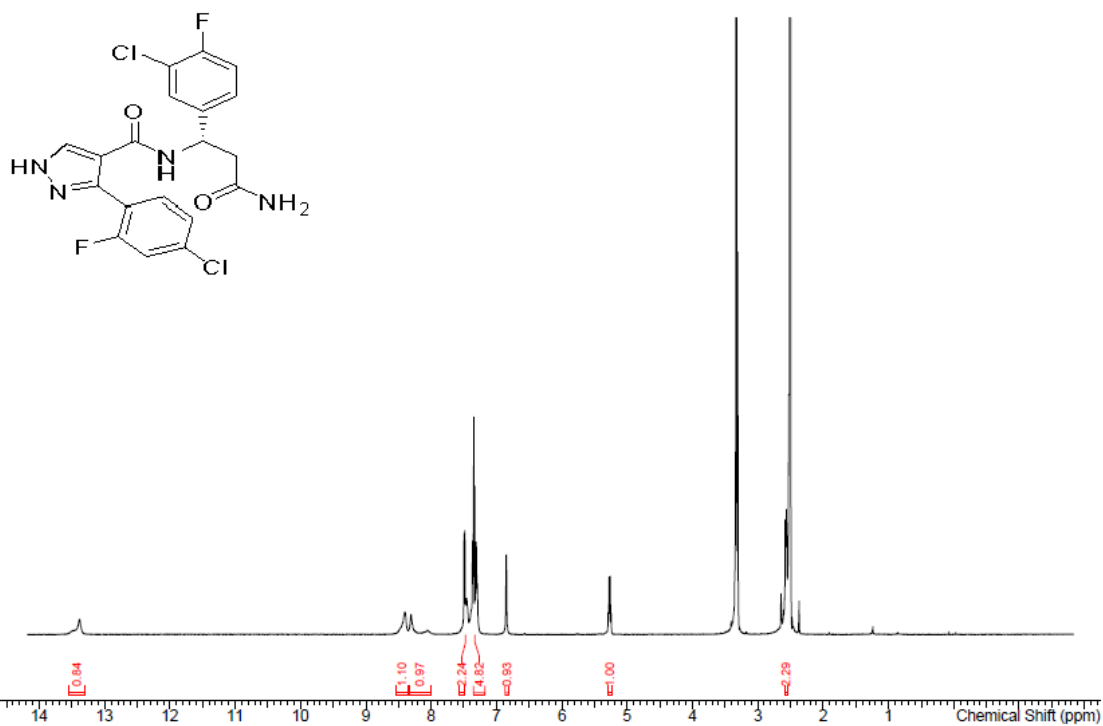

### <sup>13</sup>C NMR Spectra for compound **26e** (DMSO-*d*<sub>6</sub>, 176 MHz)

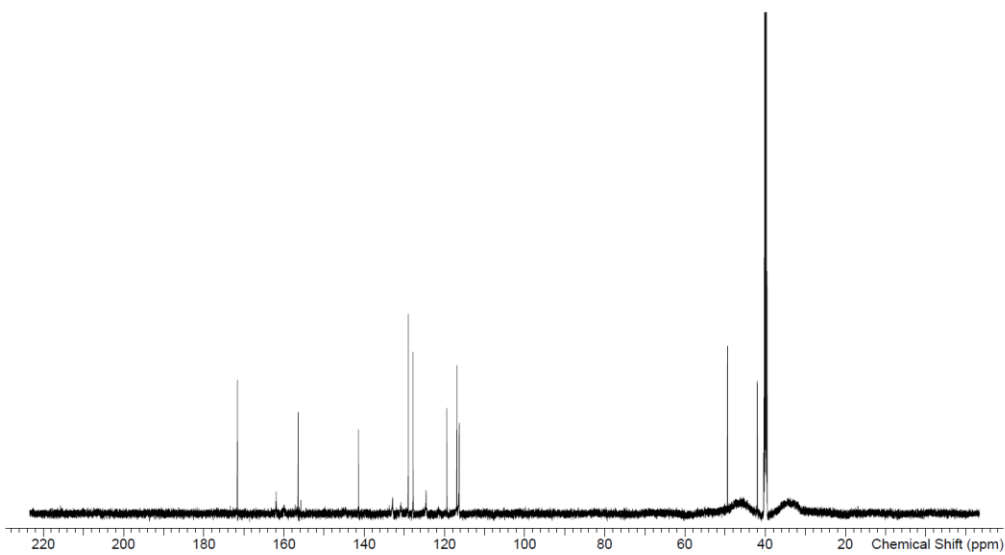

<sup>13</sup>C NMR (176 MHz, DMSO-*d*<sub>6</sub>) δ ppm 171.6, 161.9, 160.0, 155.8, 141.4, 132.9, 130.8, 129.0, 127.8, 124.6, 119.4, 116.9, 116.3, 49.4, 42.0

### 3. LCMS Spectra for tested compounds

#### LCMS Spectra for compound 3a

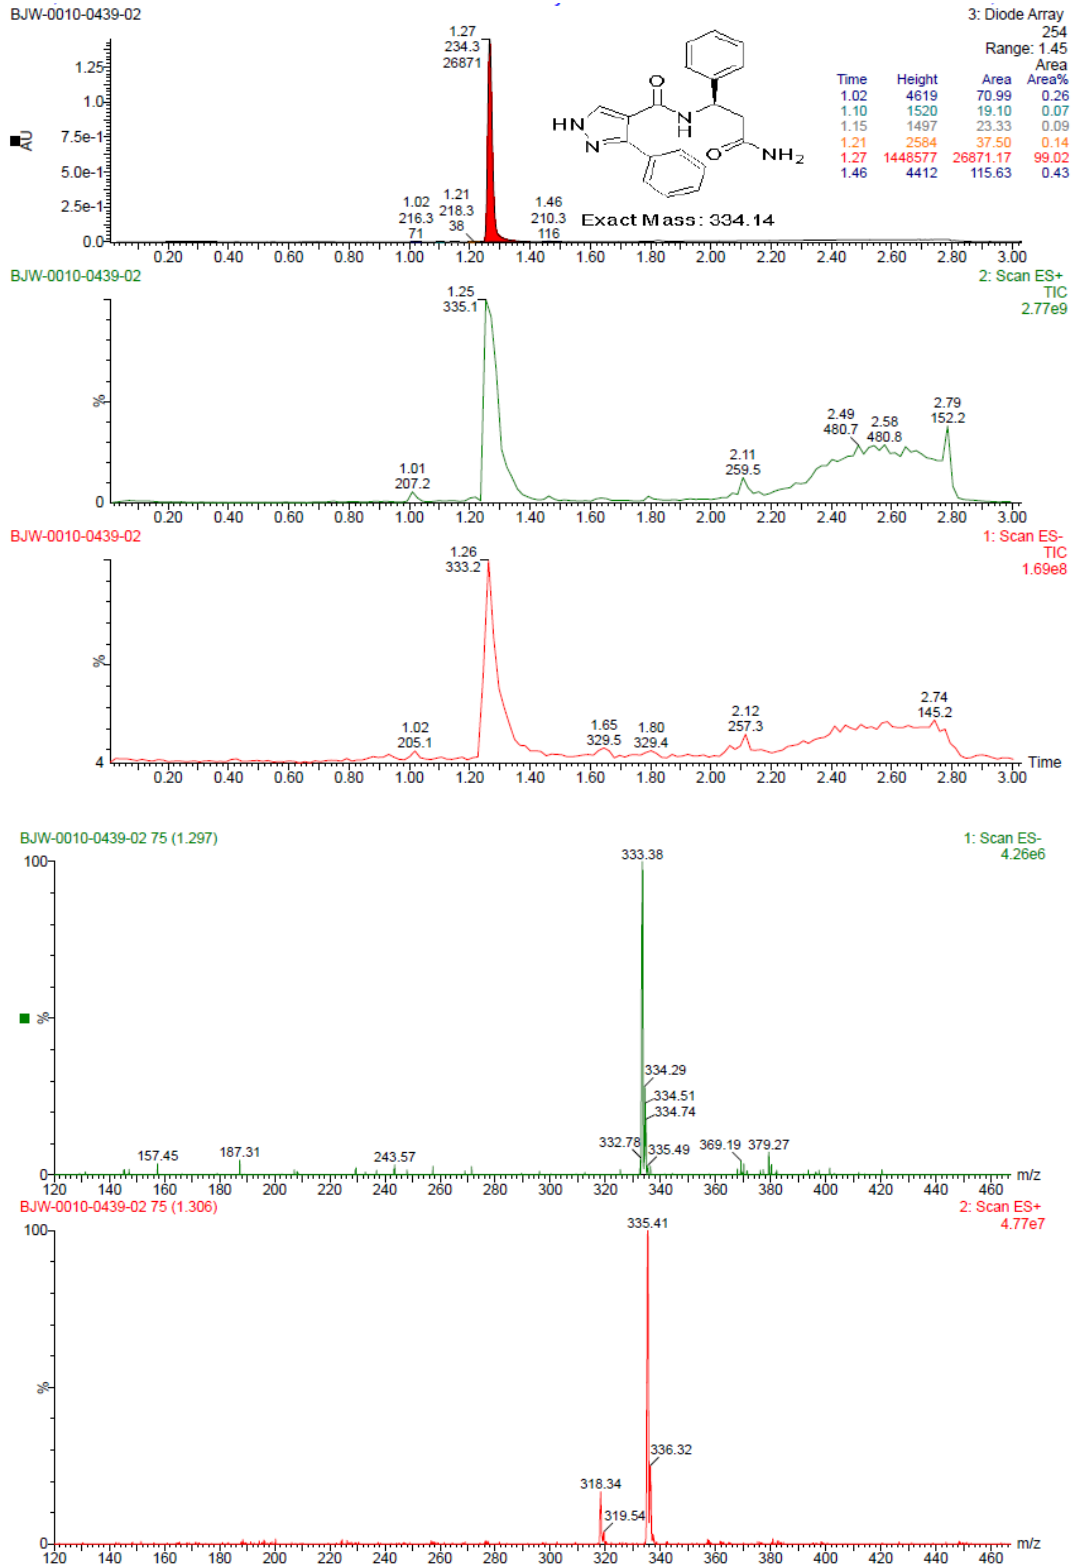

# LCMS Spectra for compound 3b

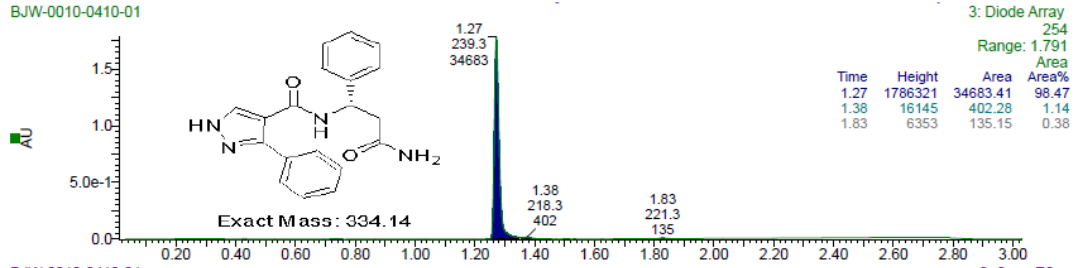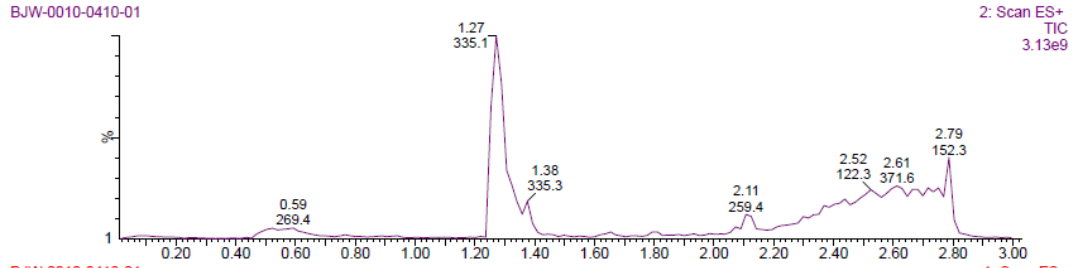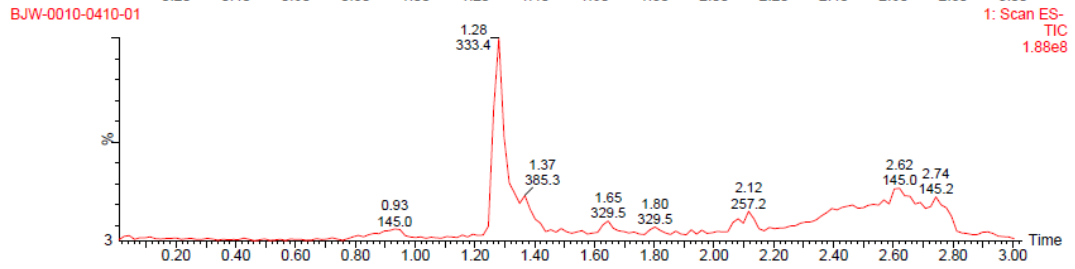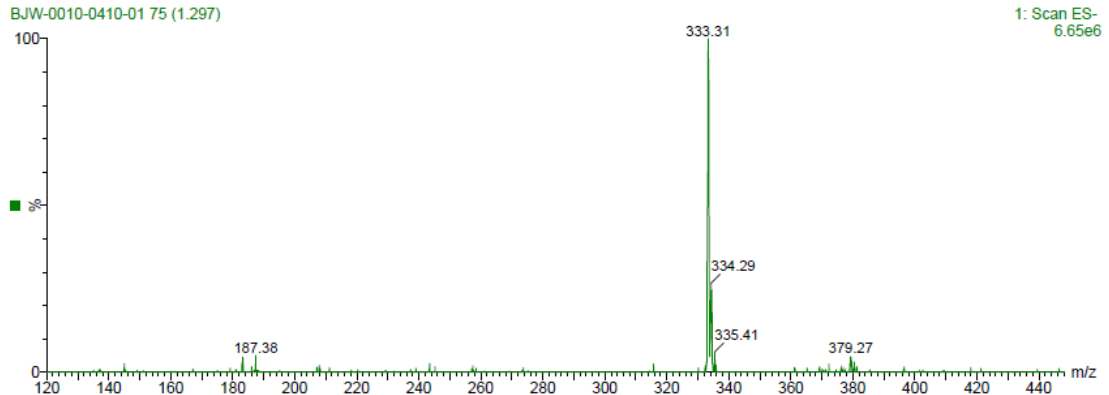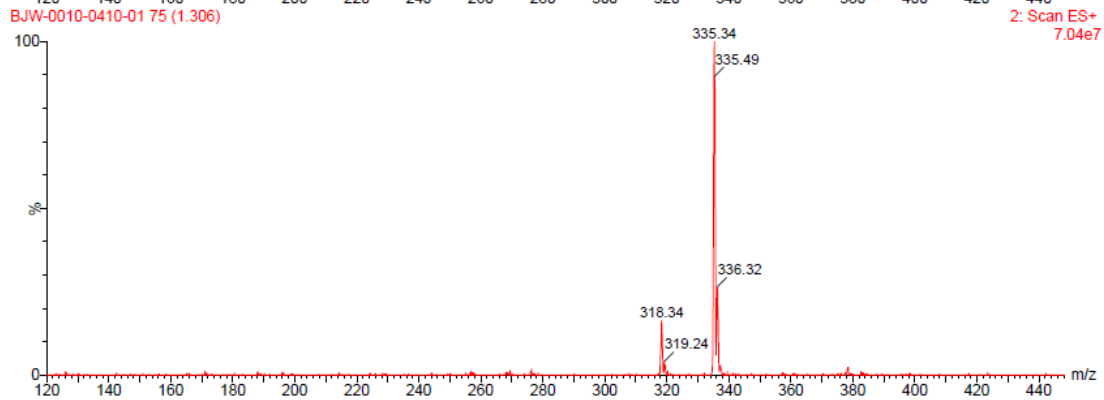

# LCMS Spectra for compound 3c

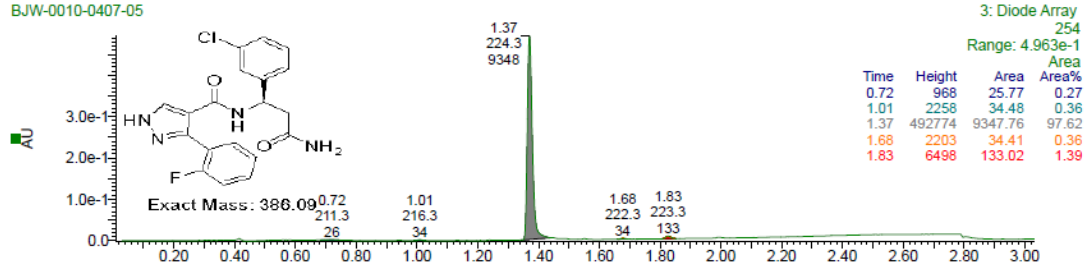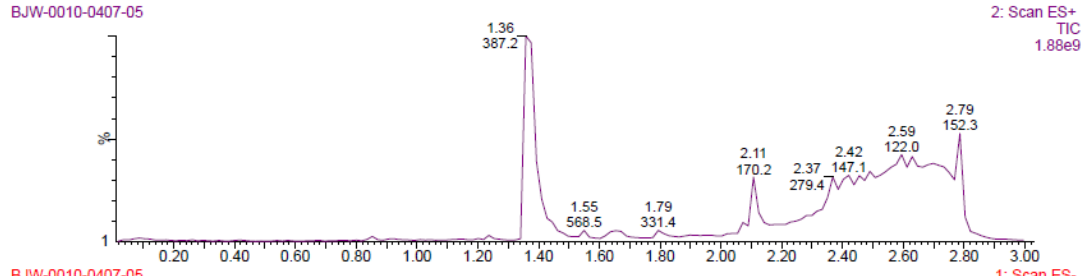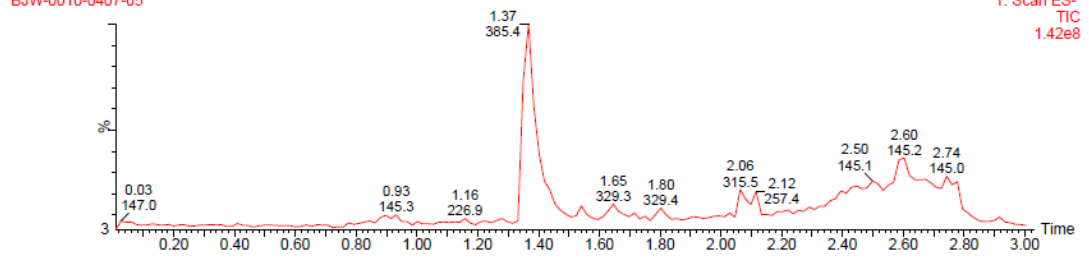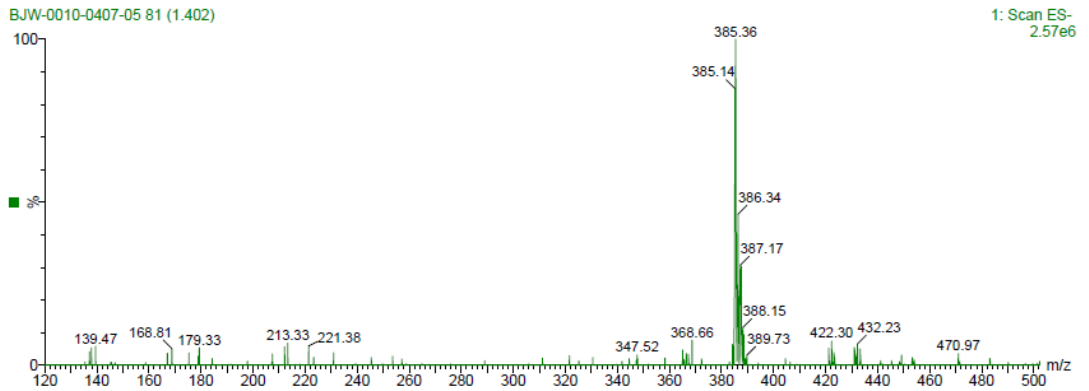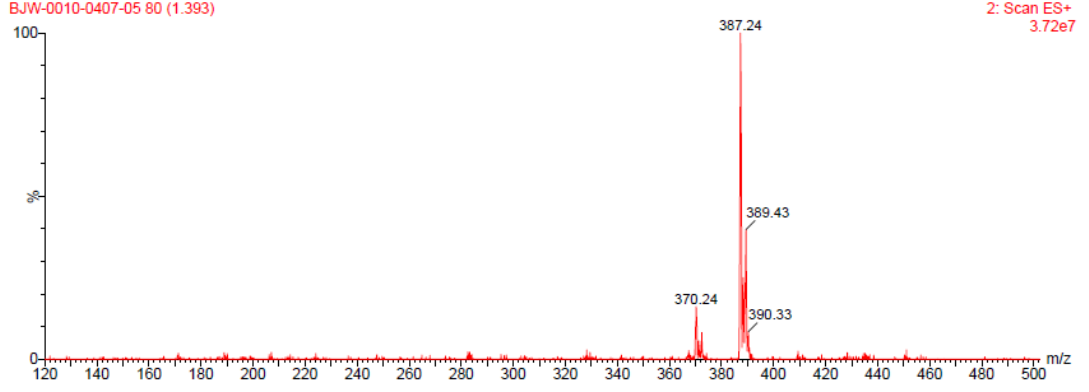

# LCMS Spectra for compound 3d

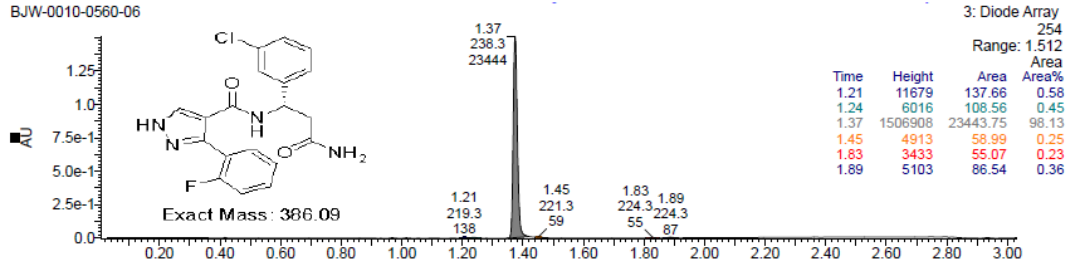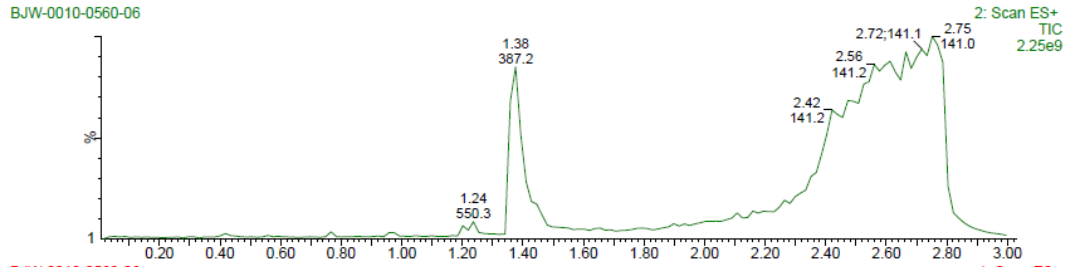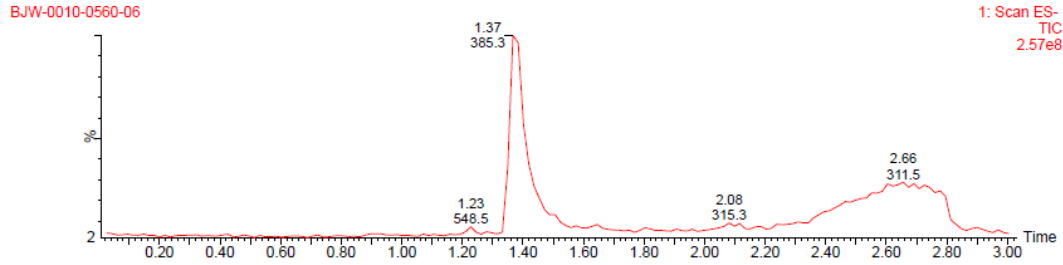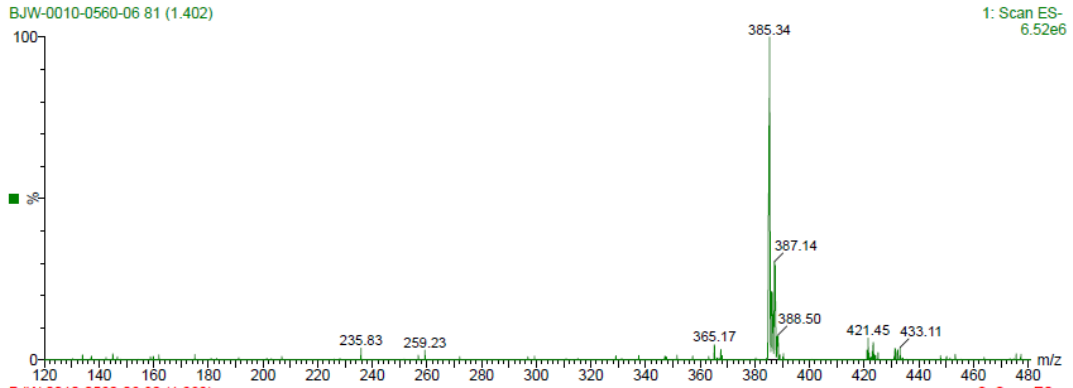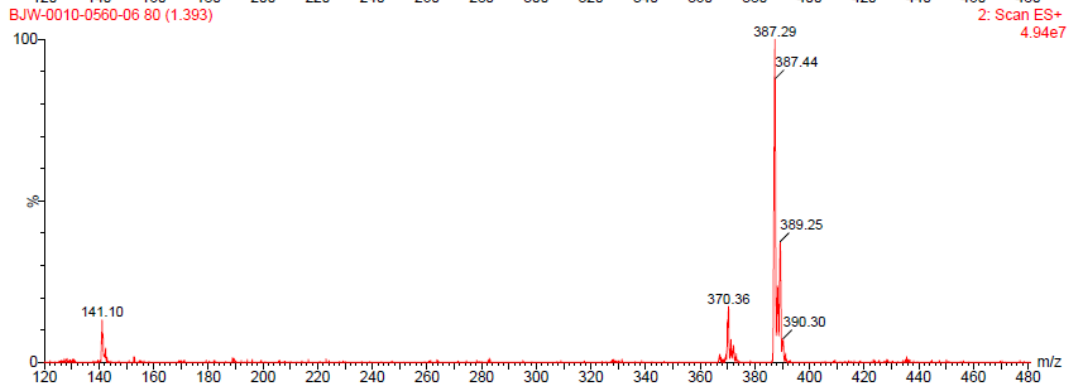

# LCMS Spectra for compound 5a

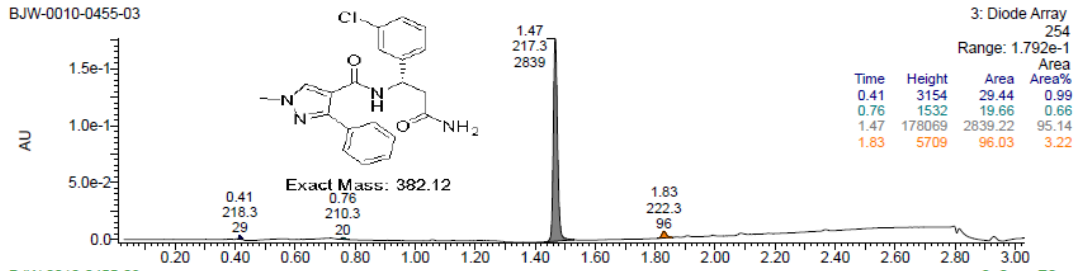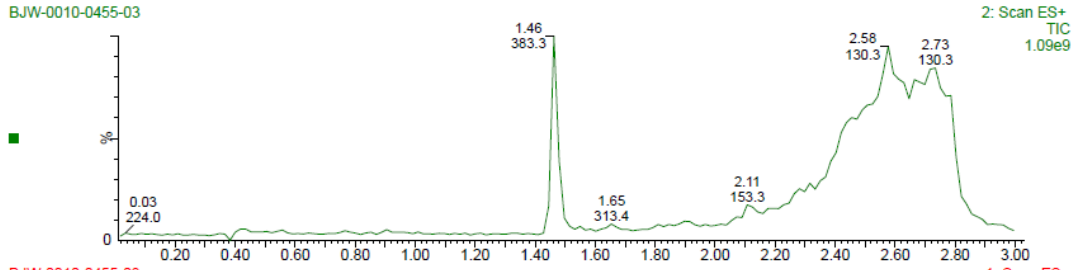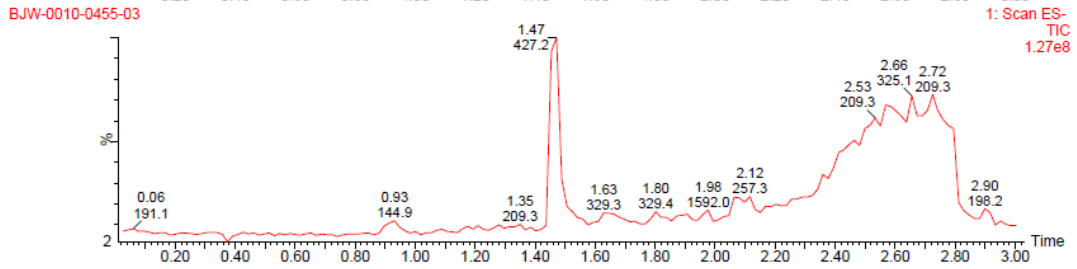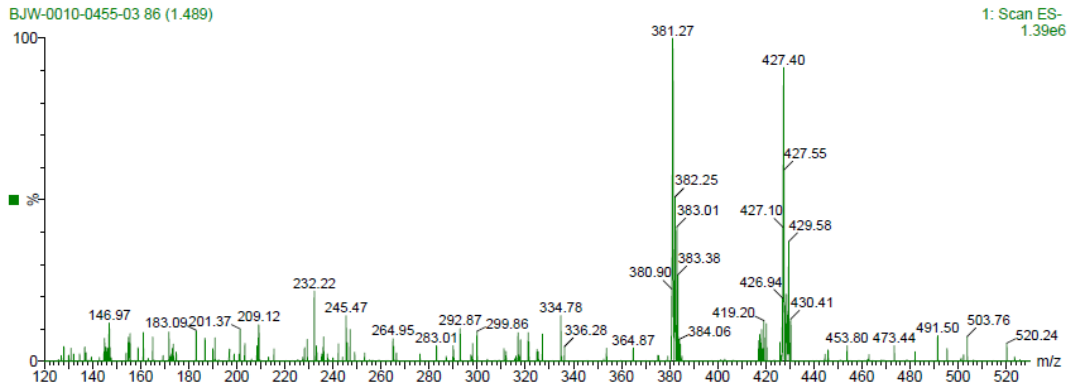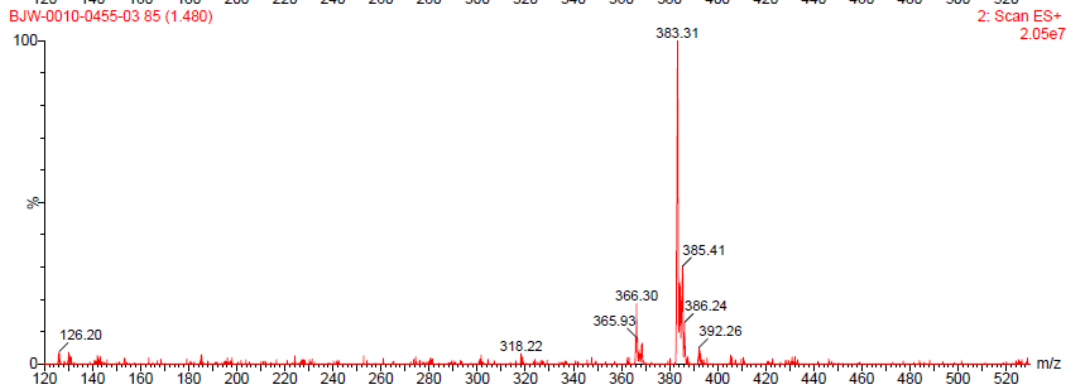

# LCMS Spectra for compound 5b

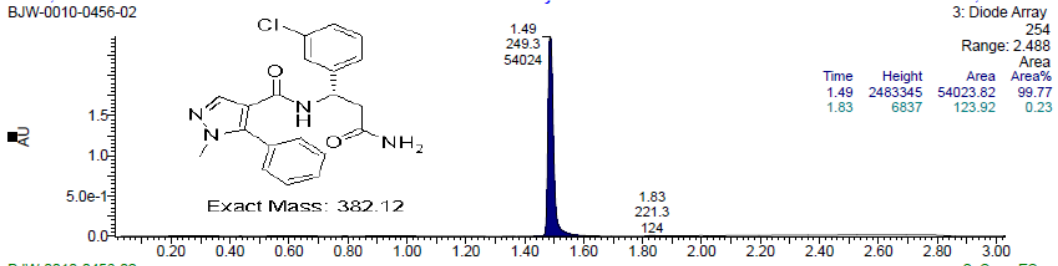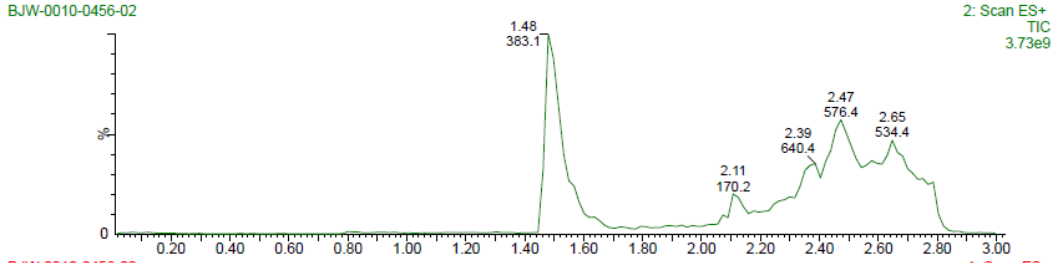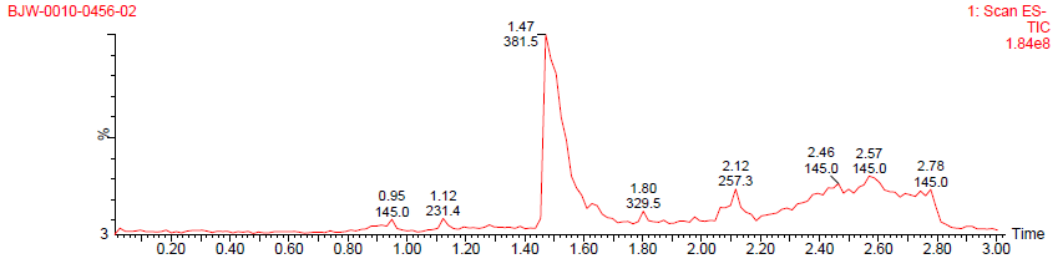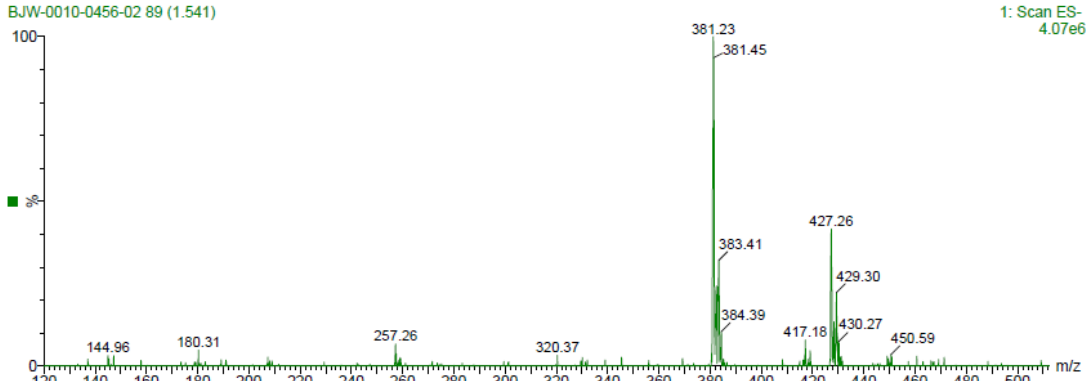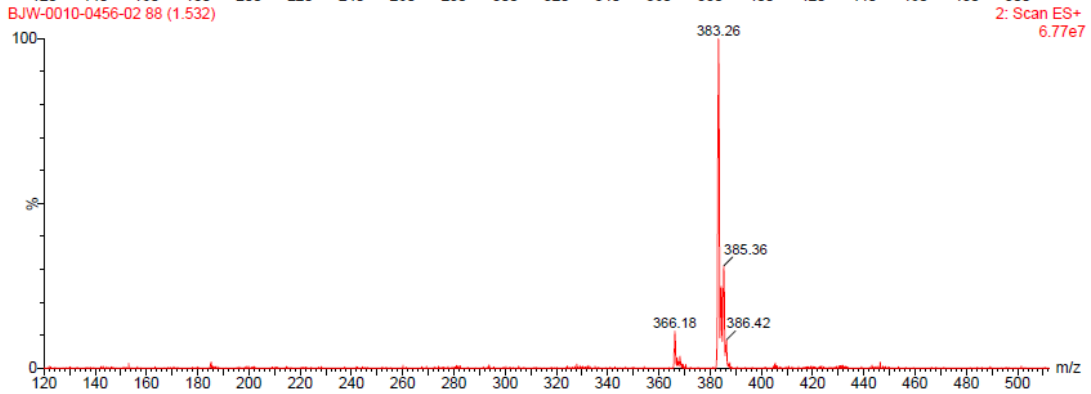



# LCMS Spectra for compound 5c

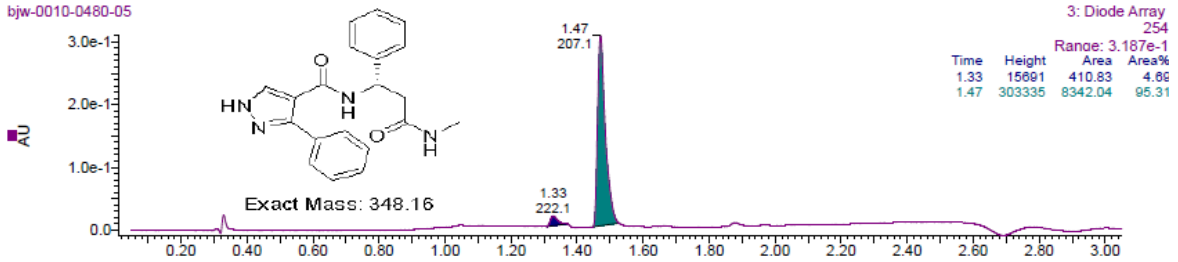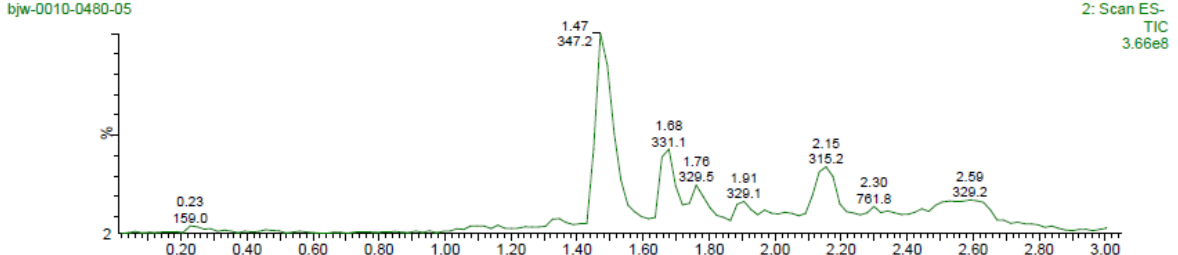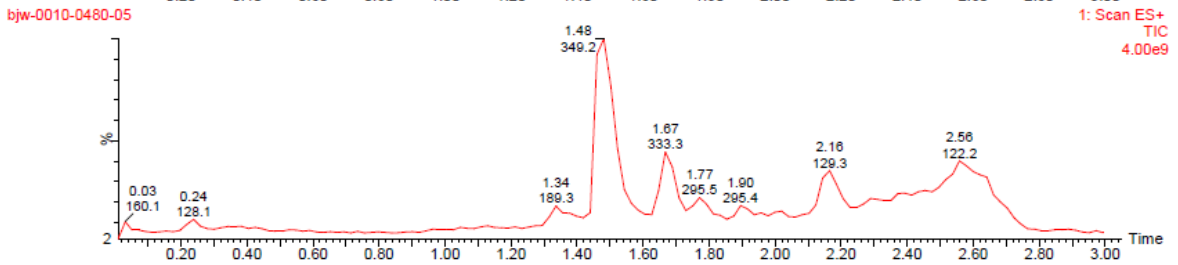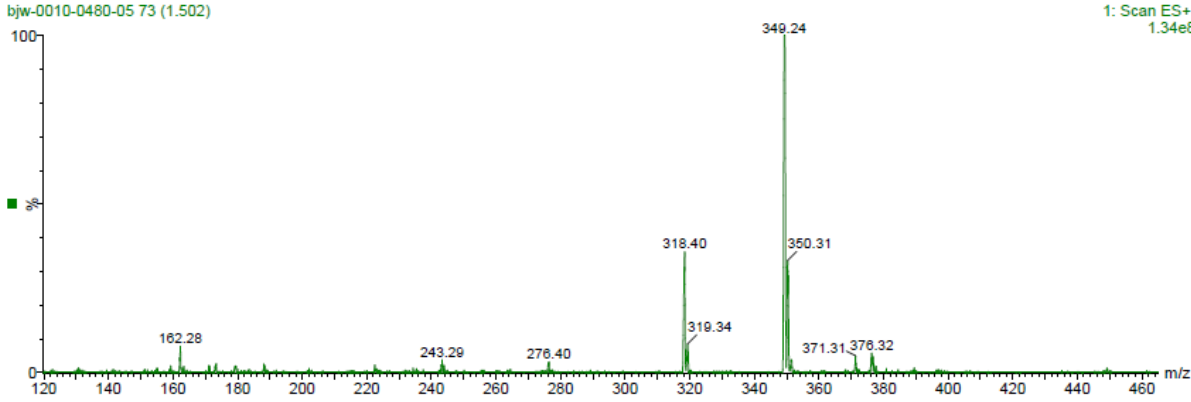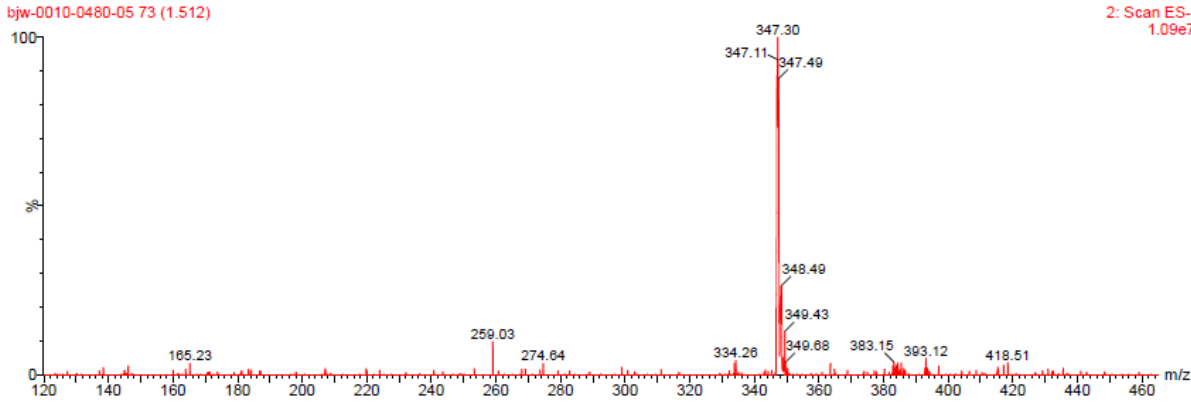

# LCMS Spectra for compound 5d

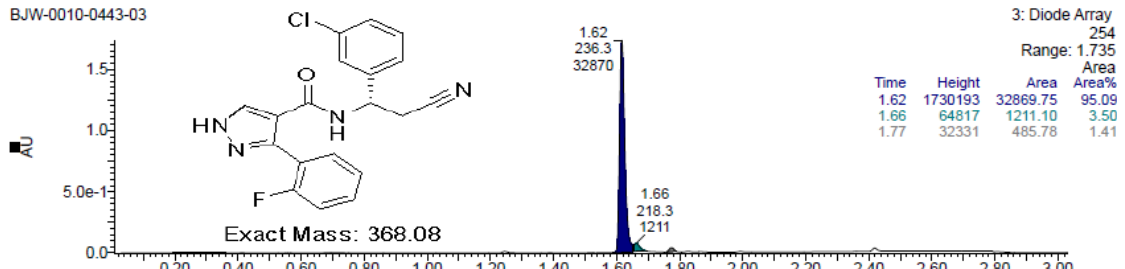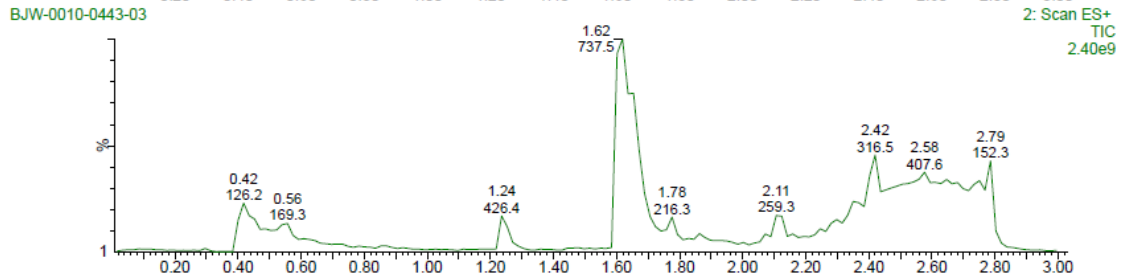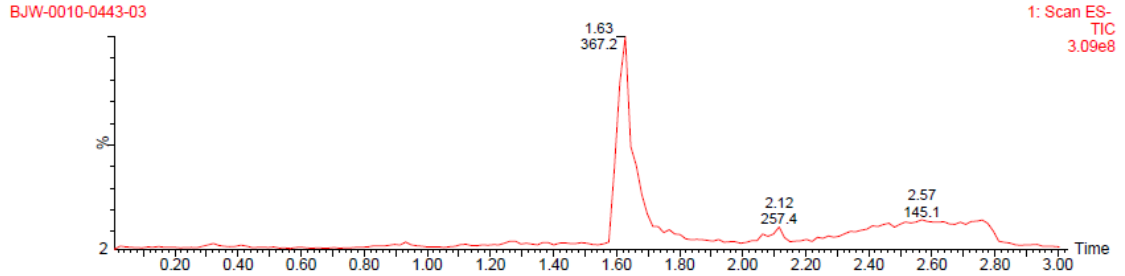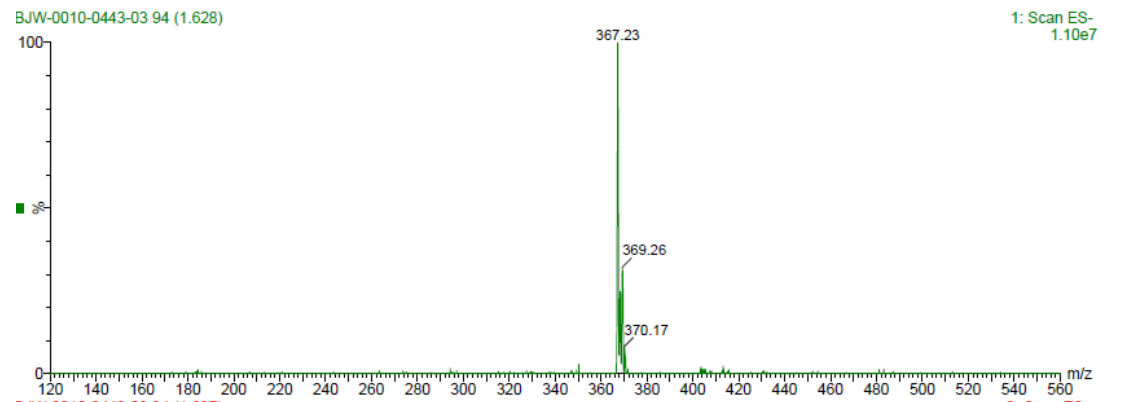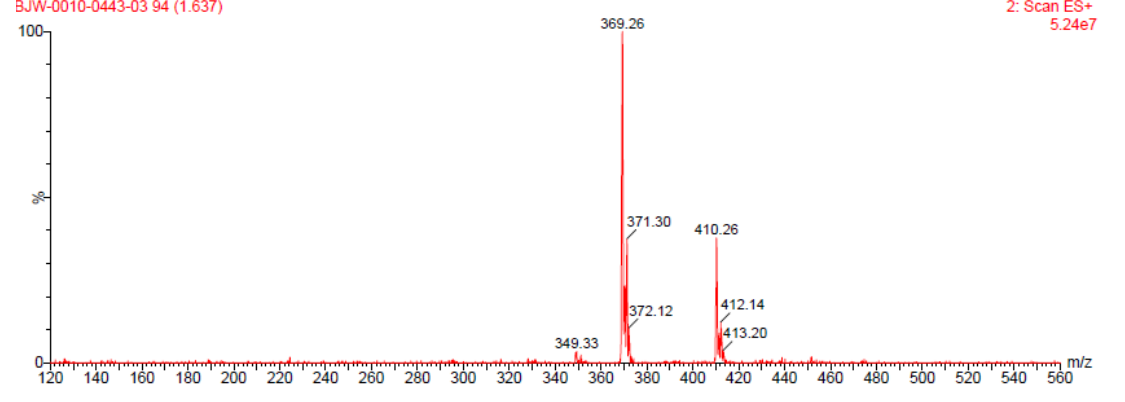

# LCMS Spectra for compound 14a

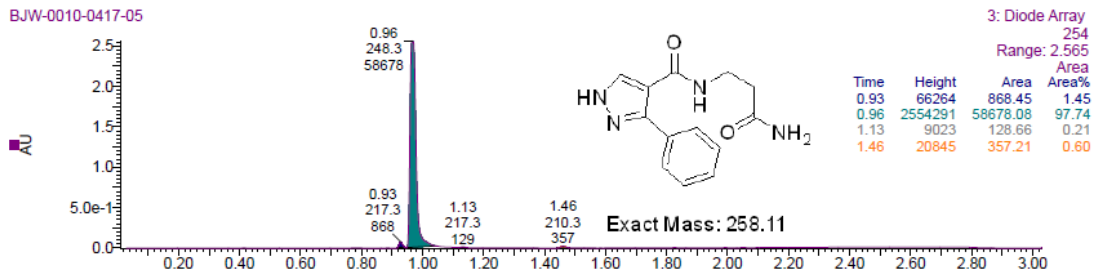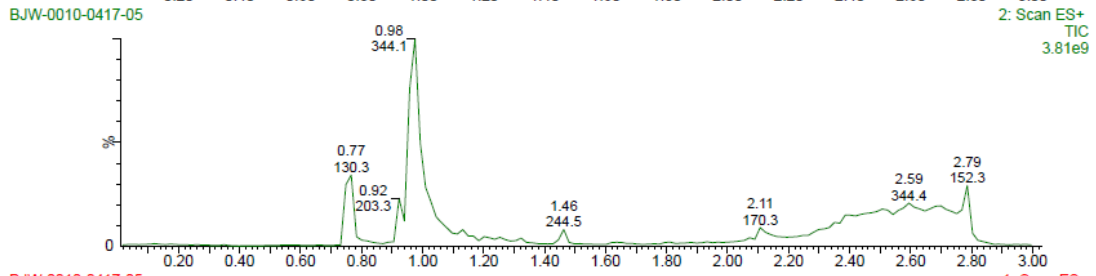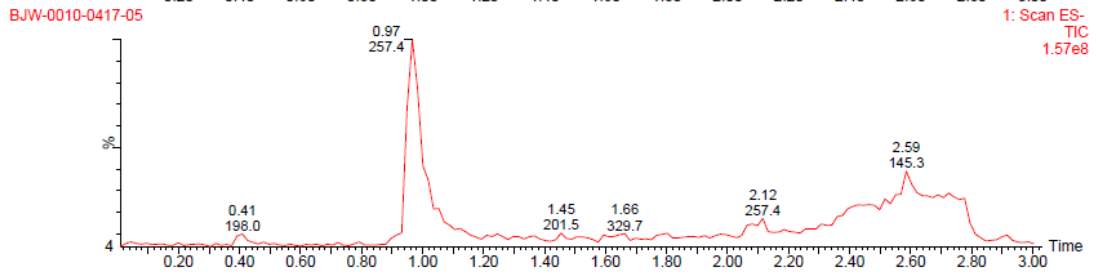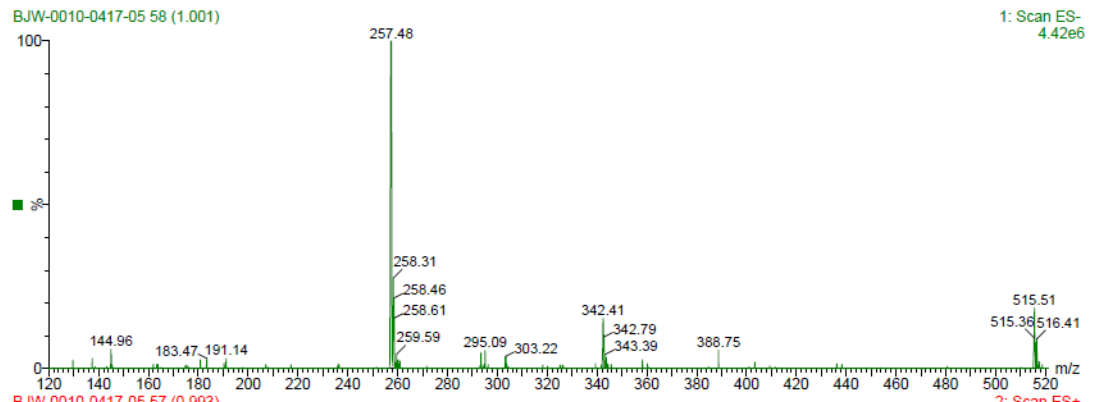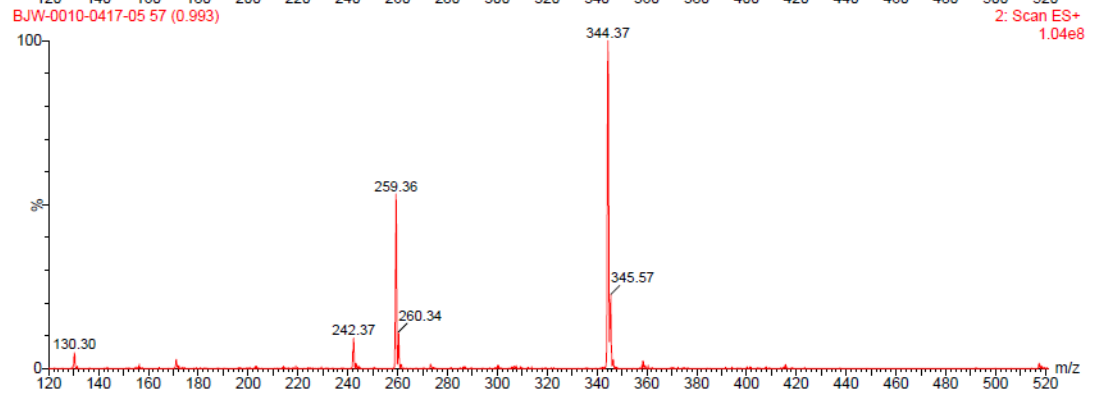

# LCMS Spectra for compound 14b

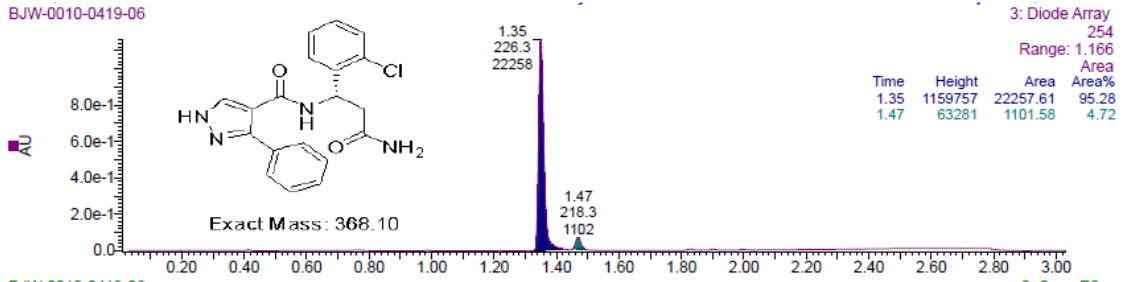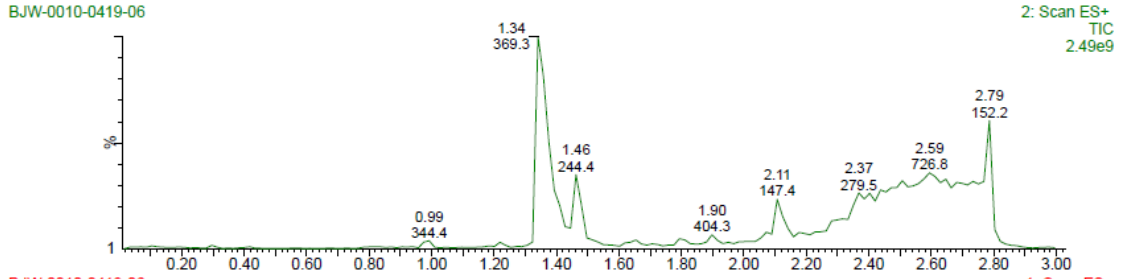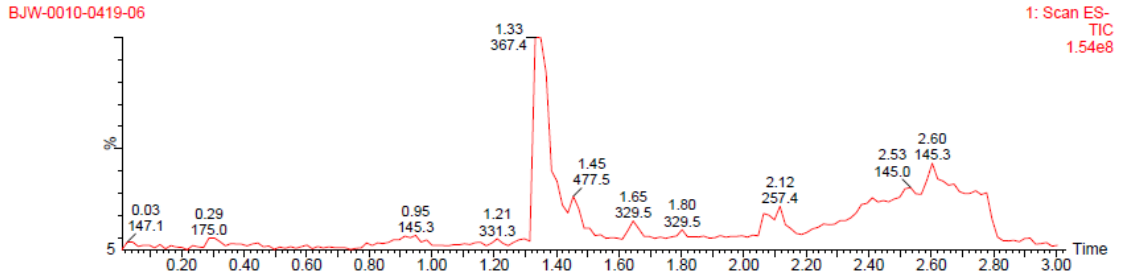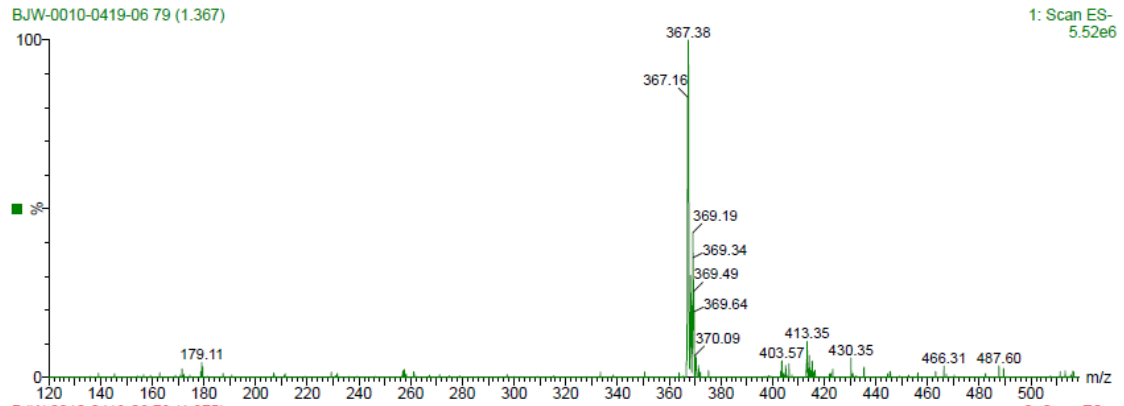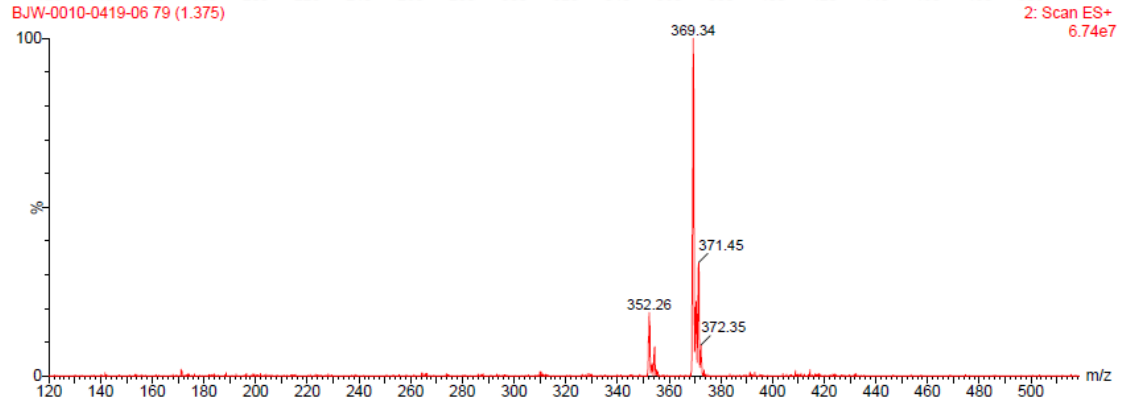

# LCMS Spectra for compound 14c

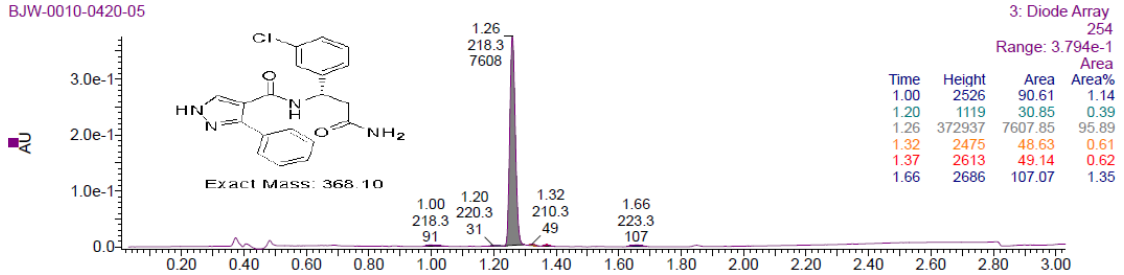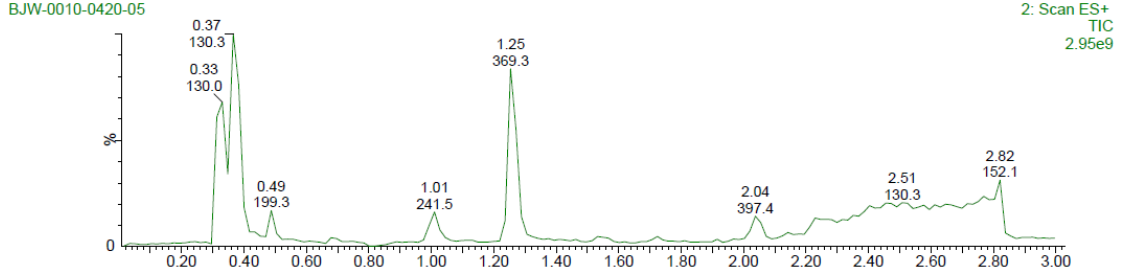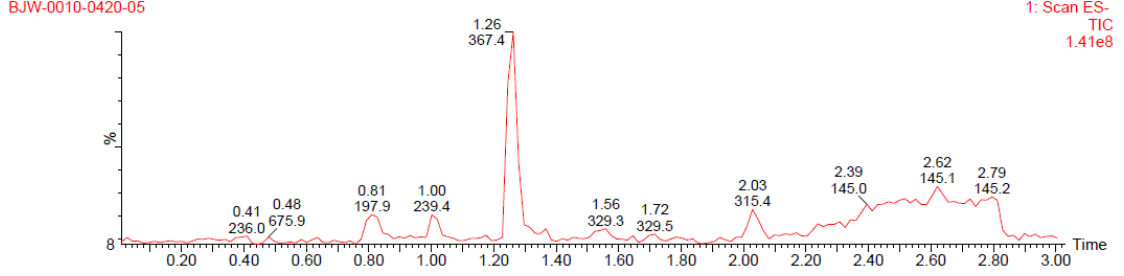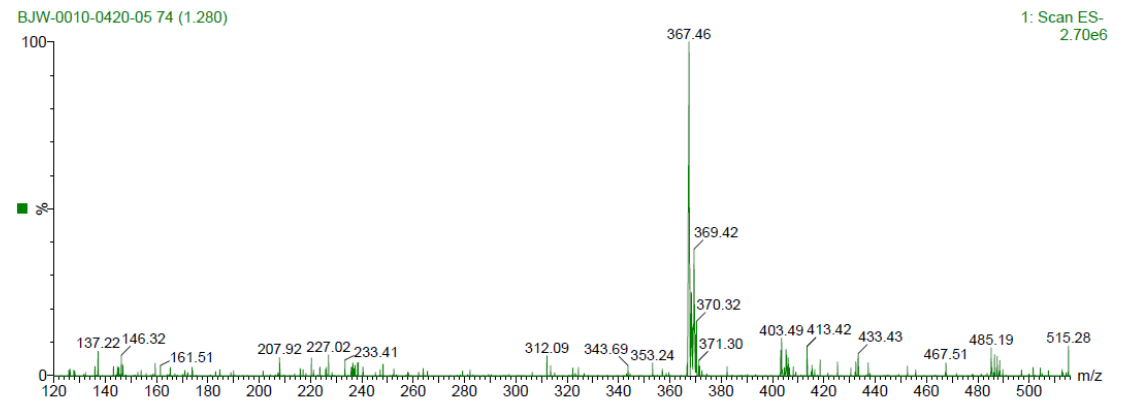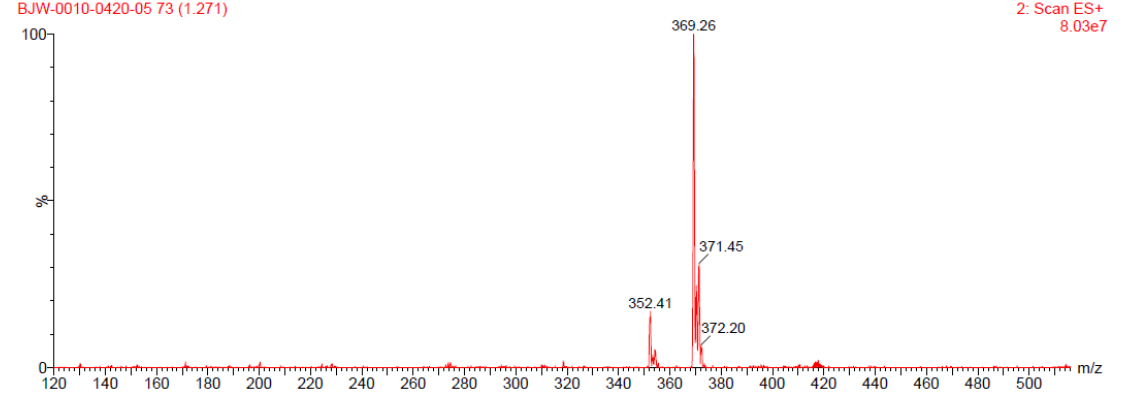

# LCMS Spectra for compound 14d

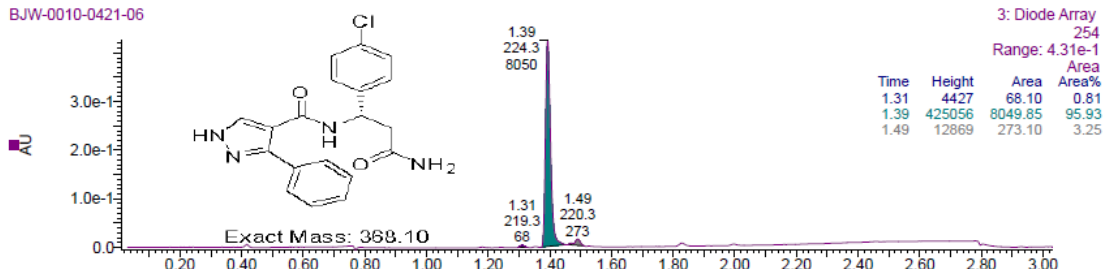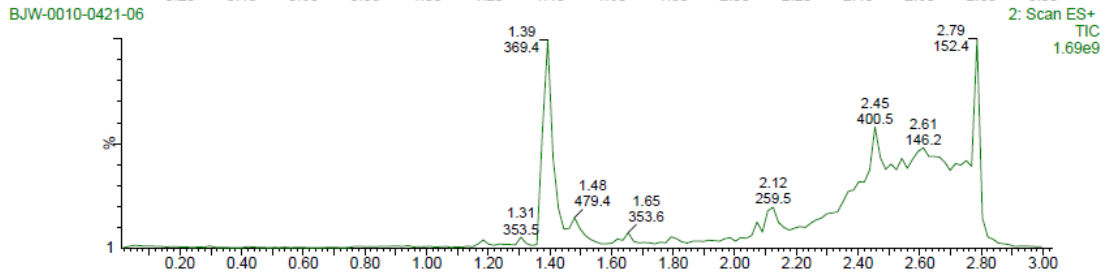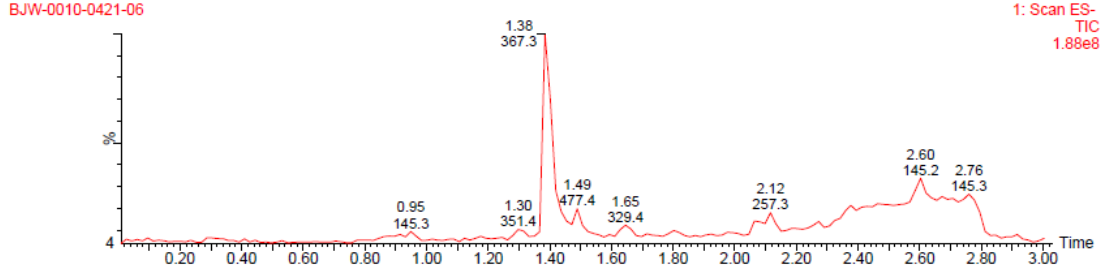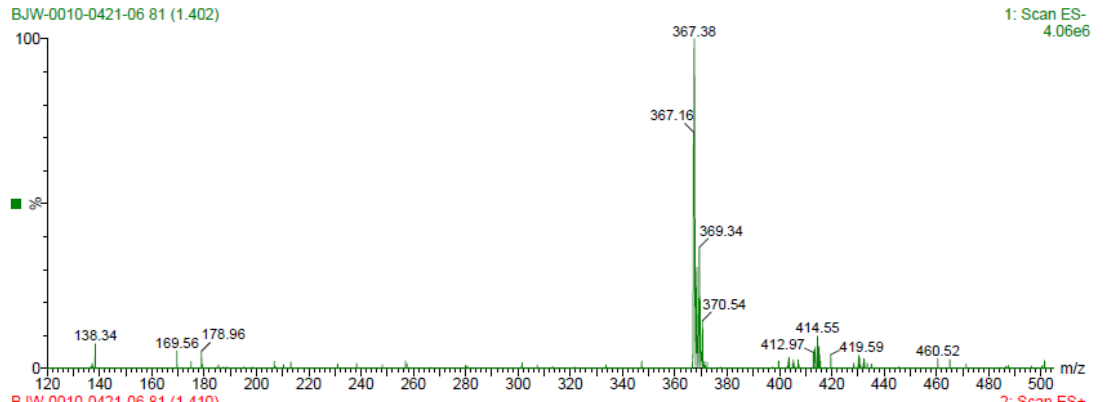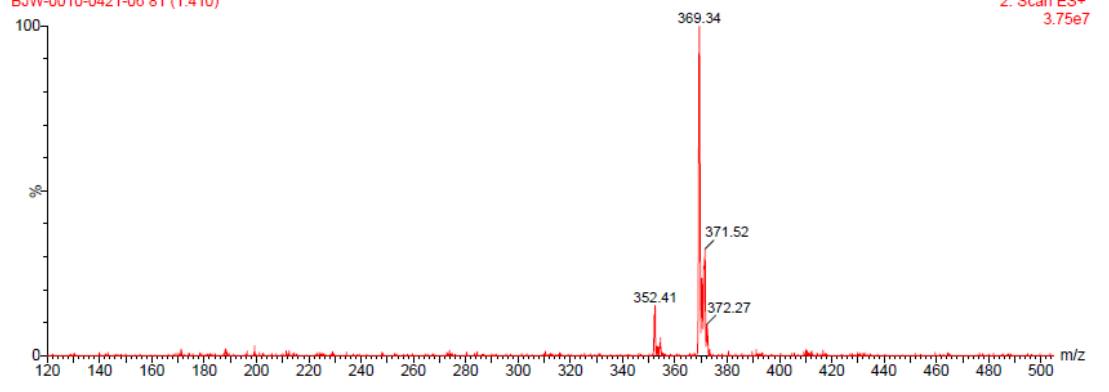

# LCMS Spectra for compound 14e

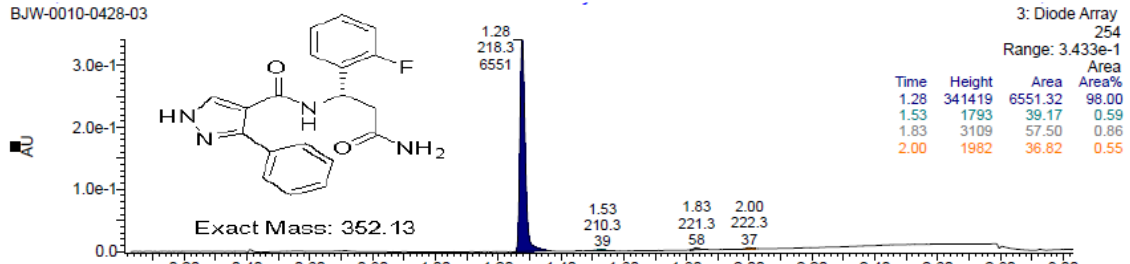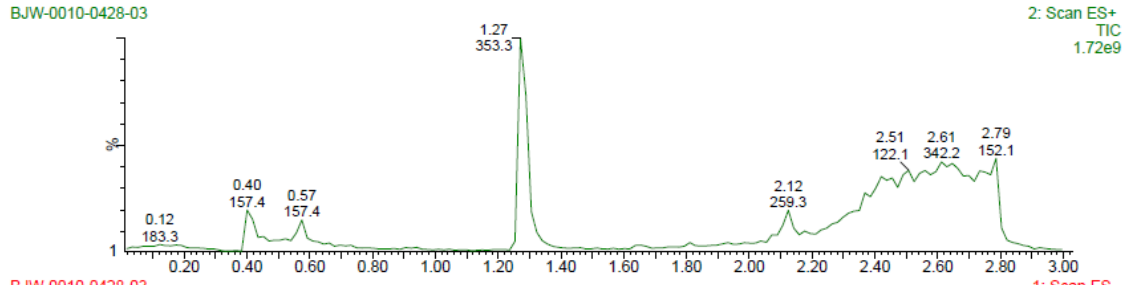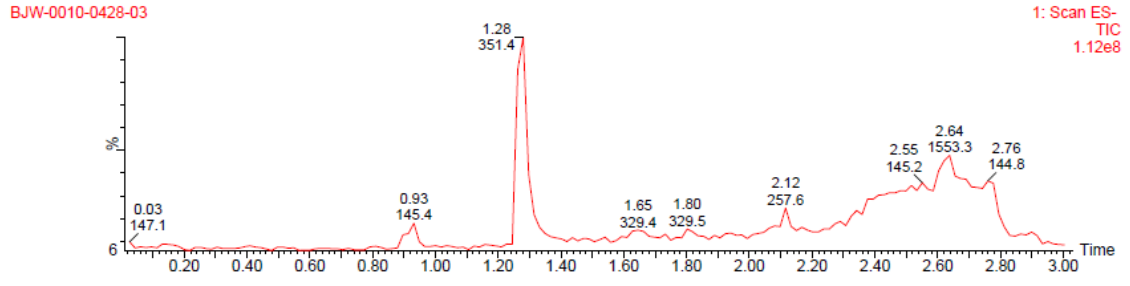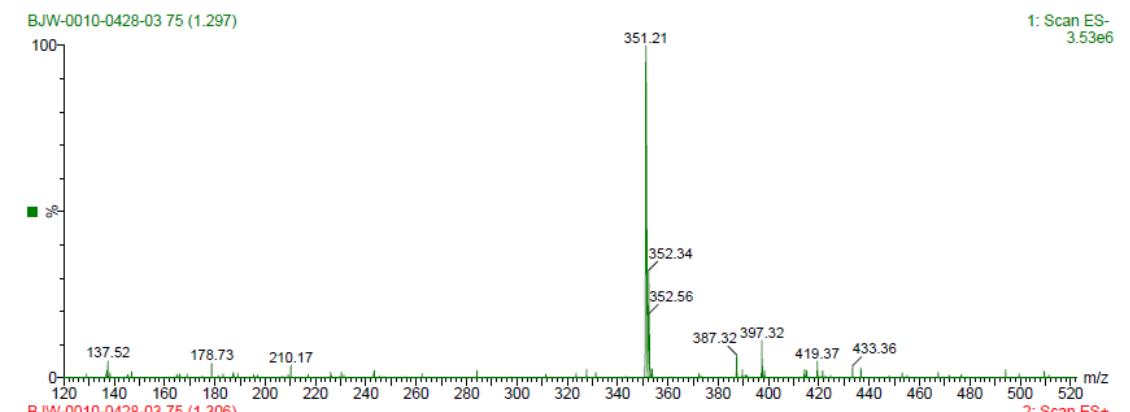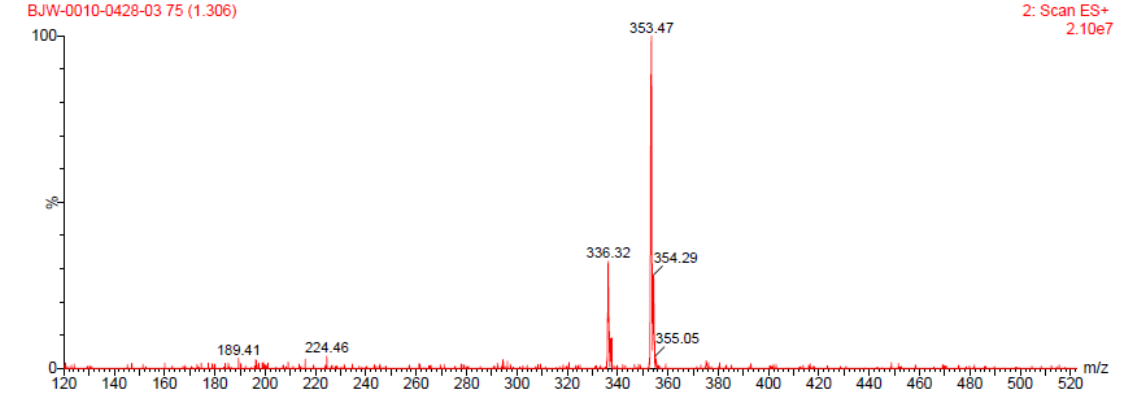

# LCMS Spectra for compound **14f**

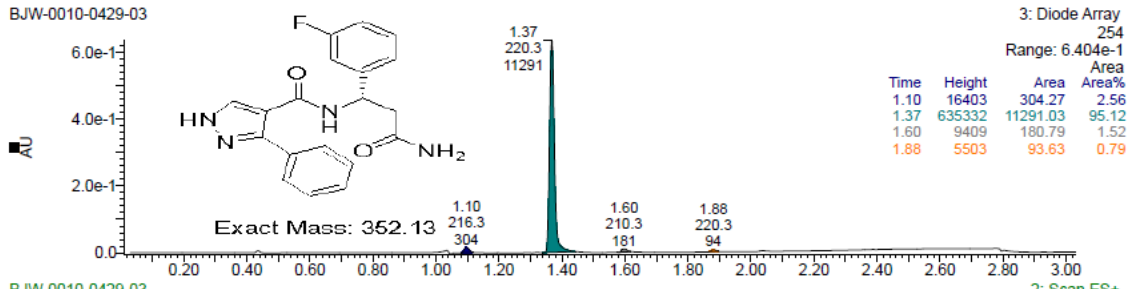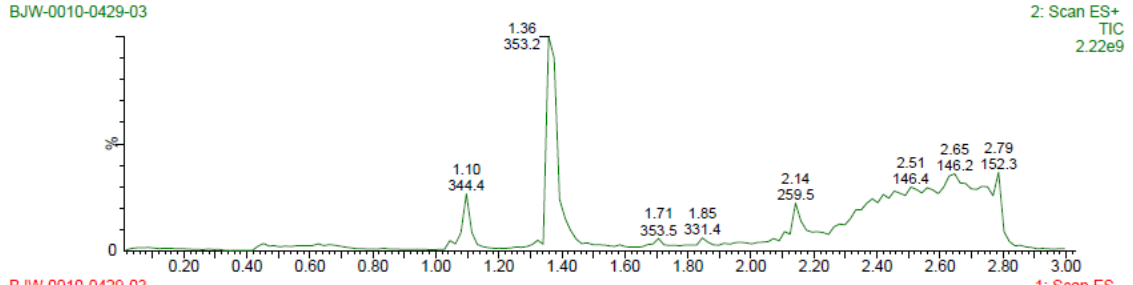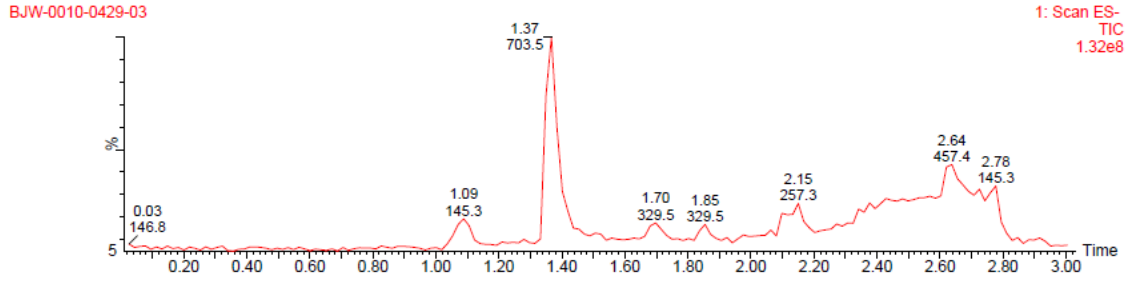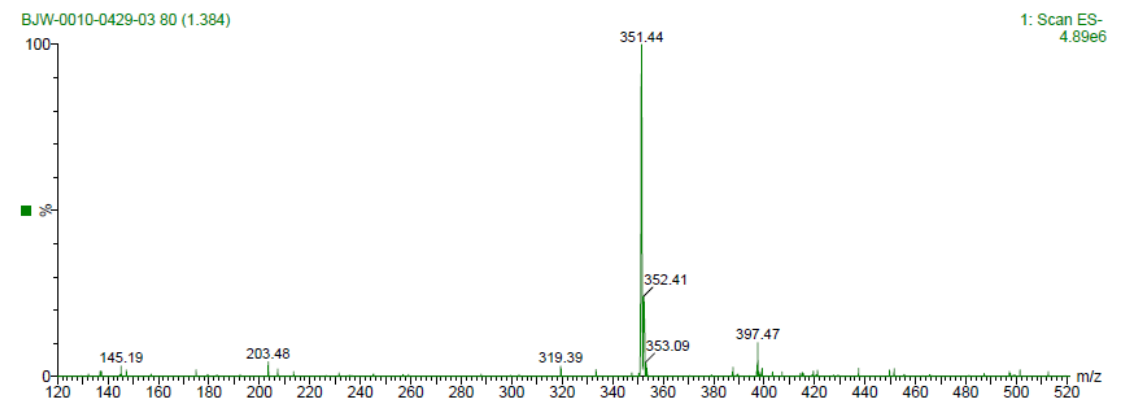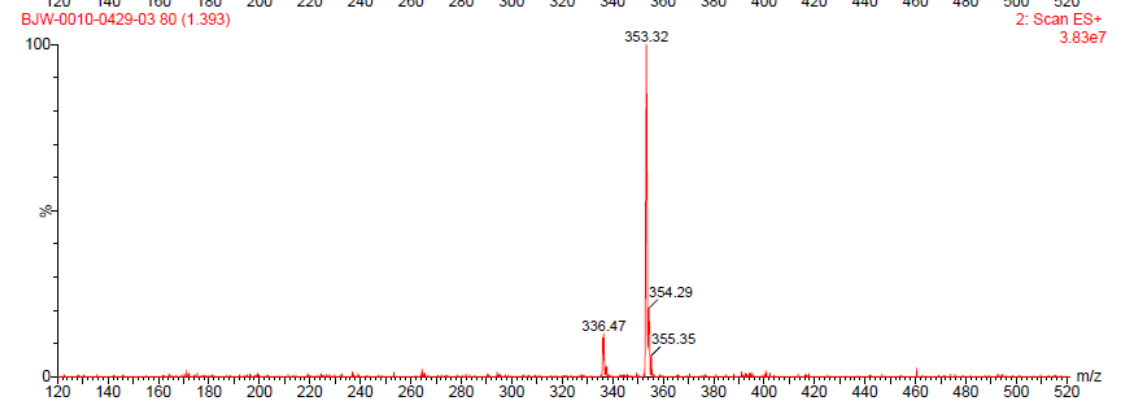



# LCMS Spectra for compound 14g

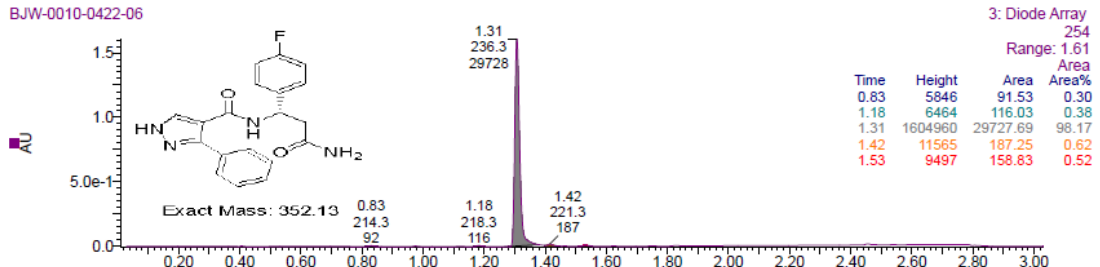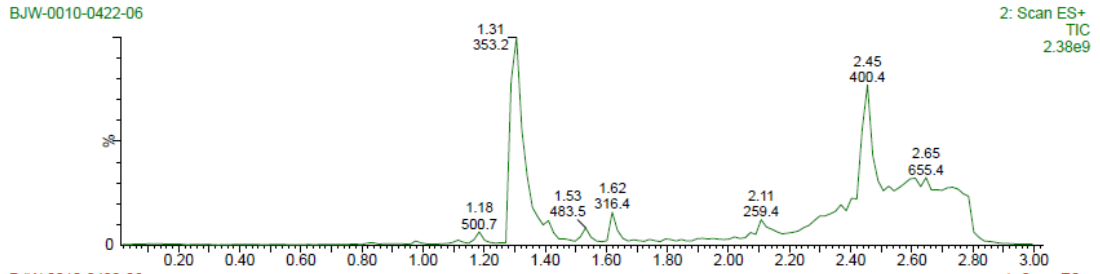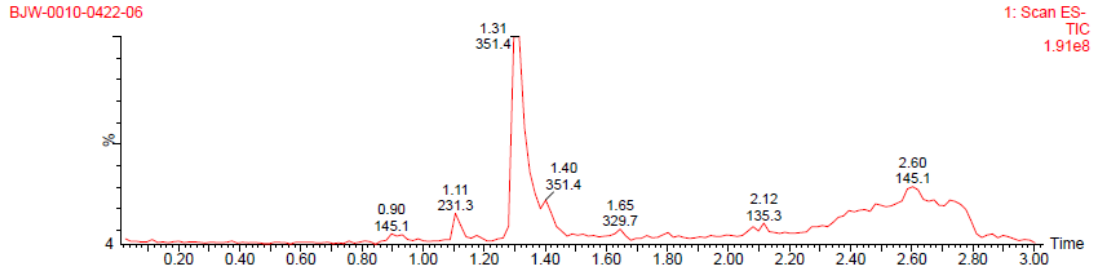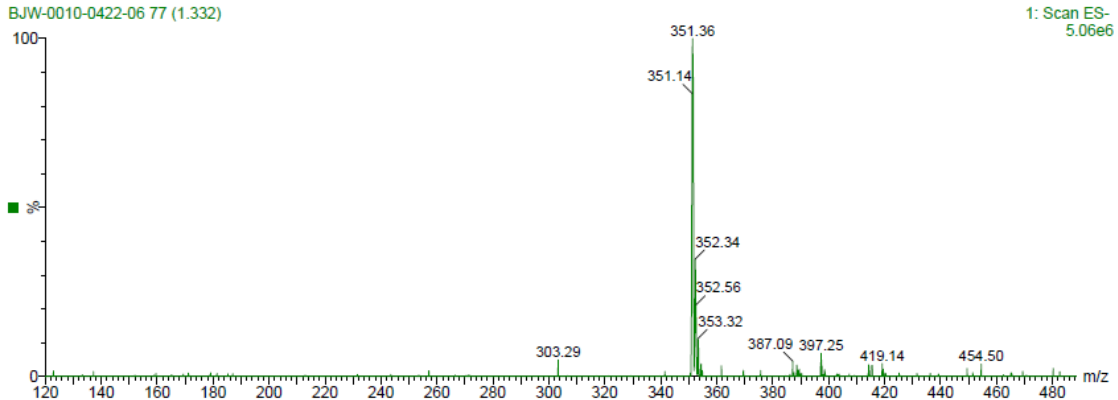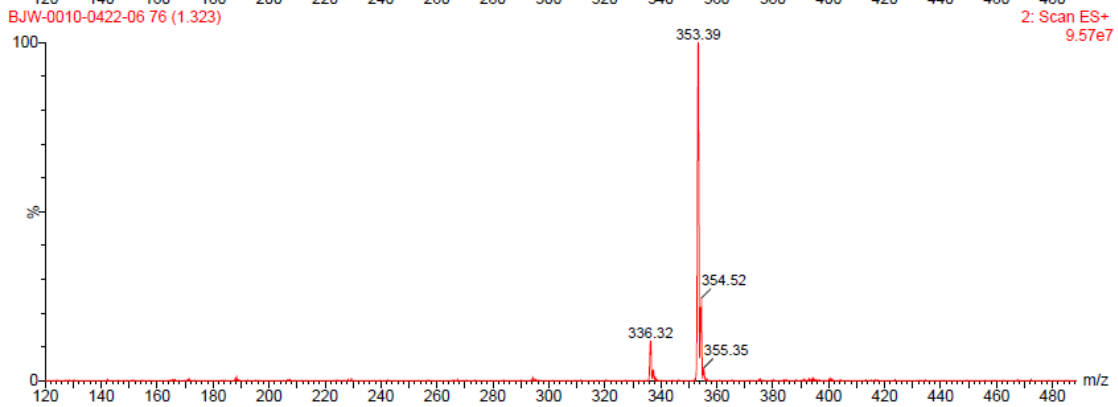

# LCMS Spectra for compound 14h

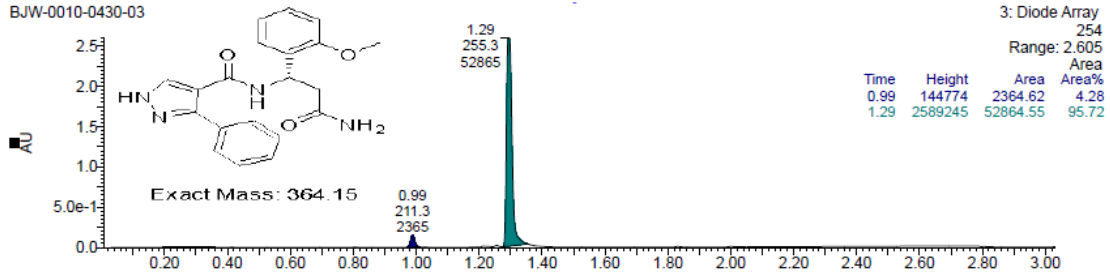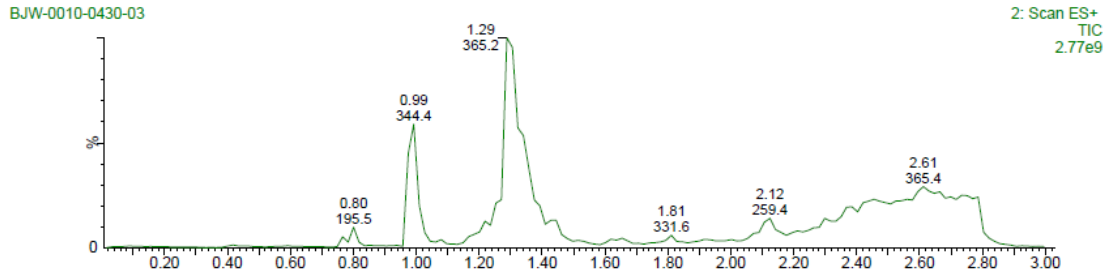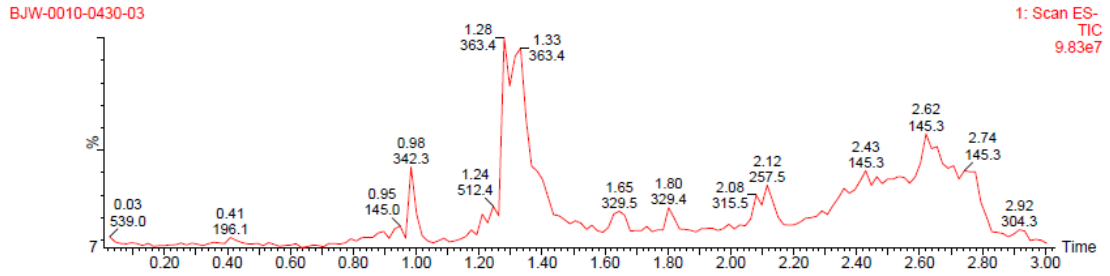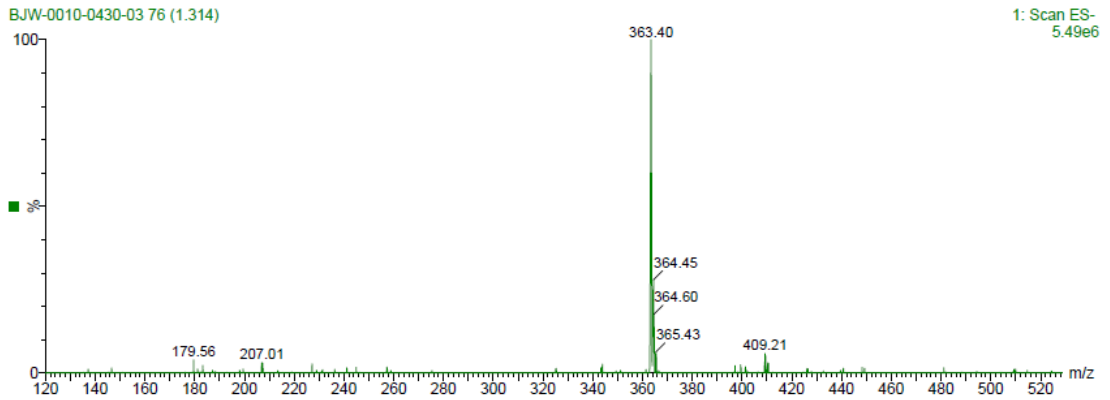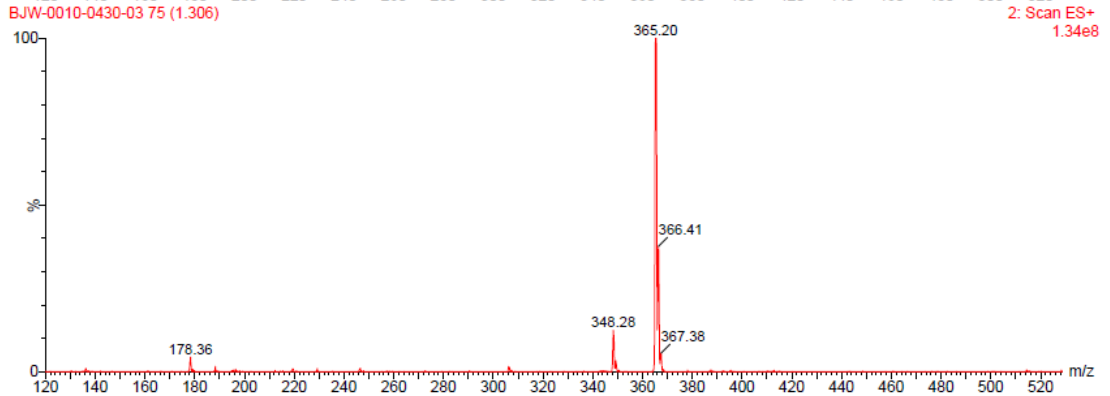

# LCMS Spectra for compound 14i

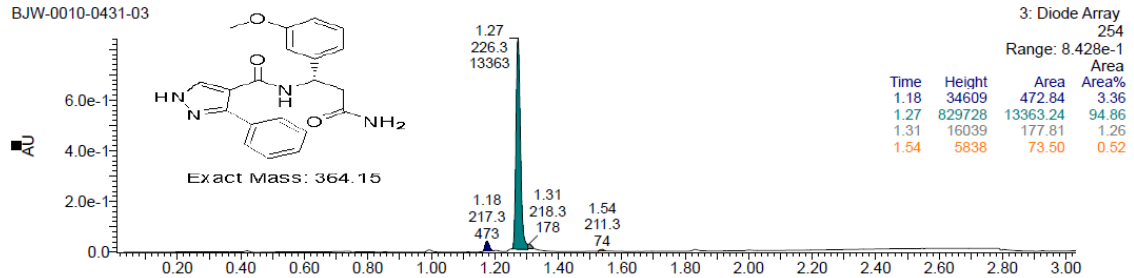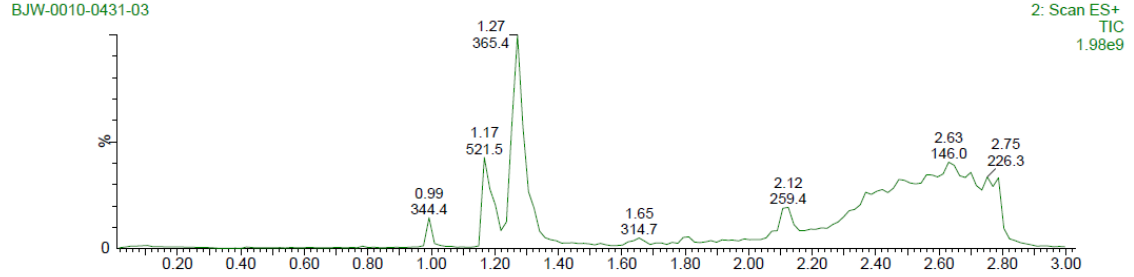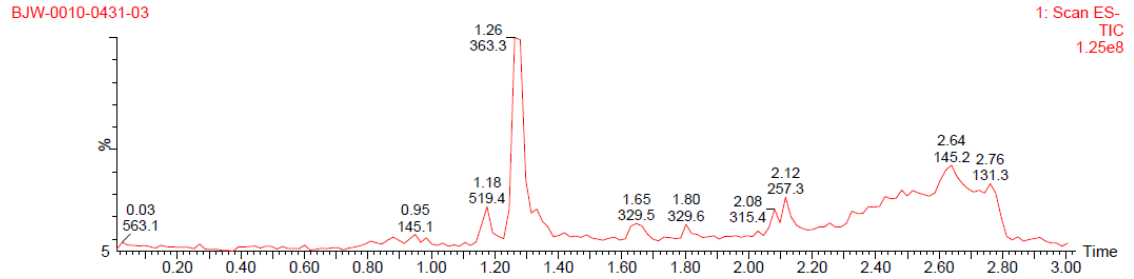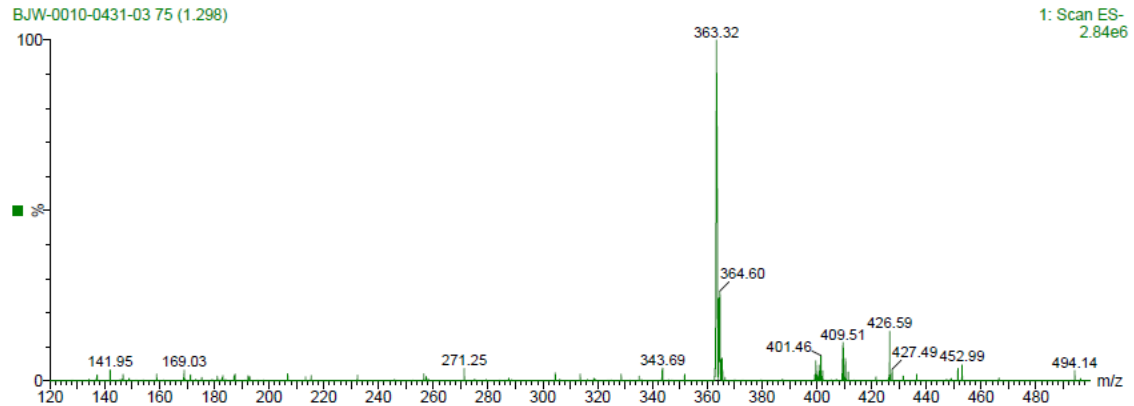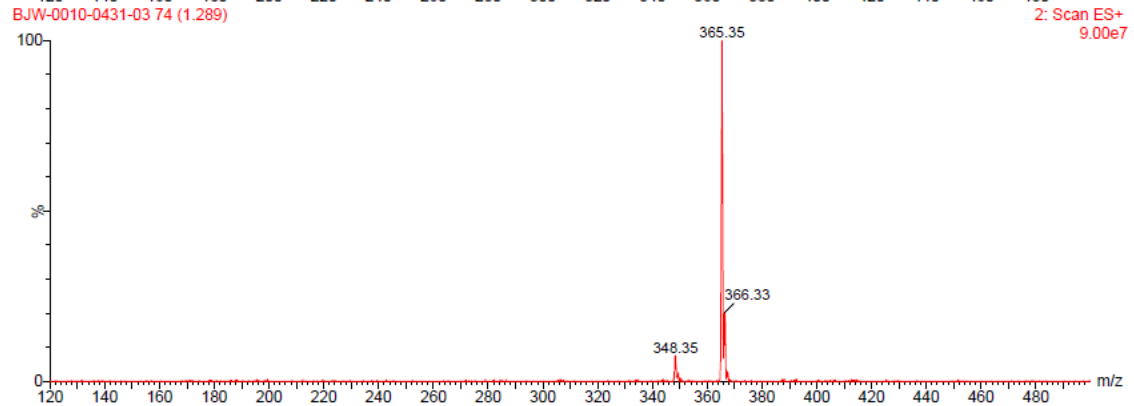

# LCMS Spectra for compound 14j

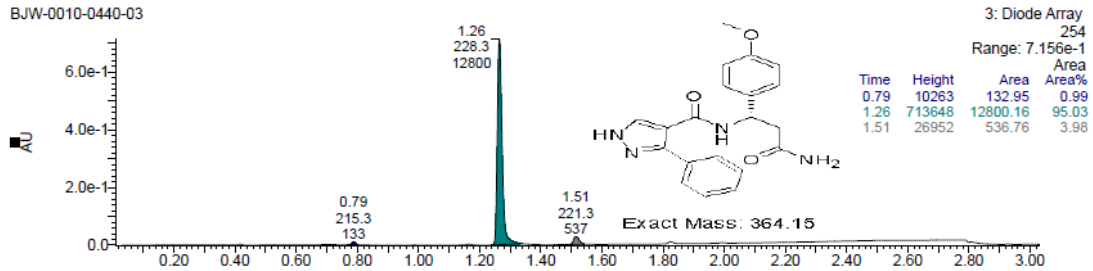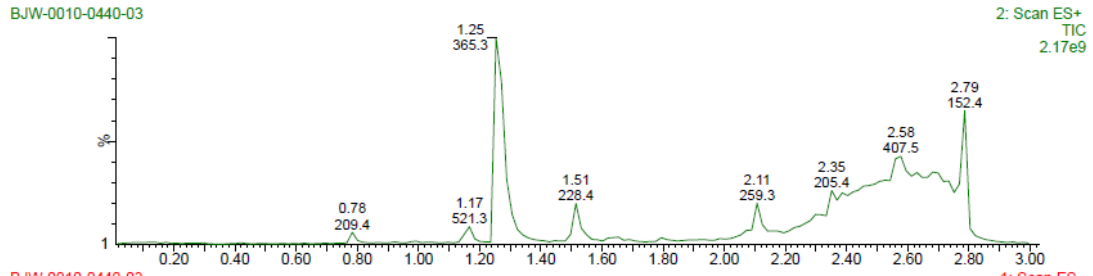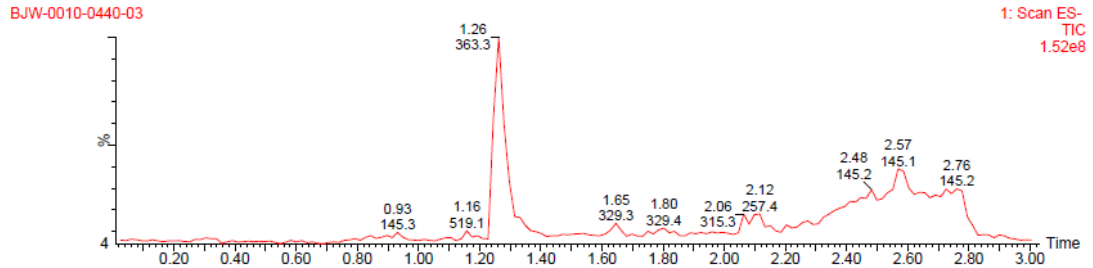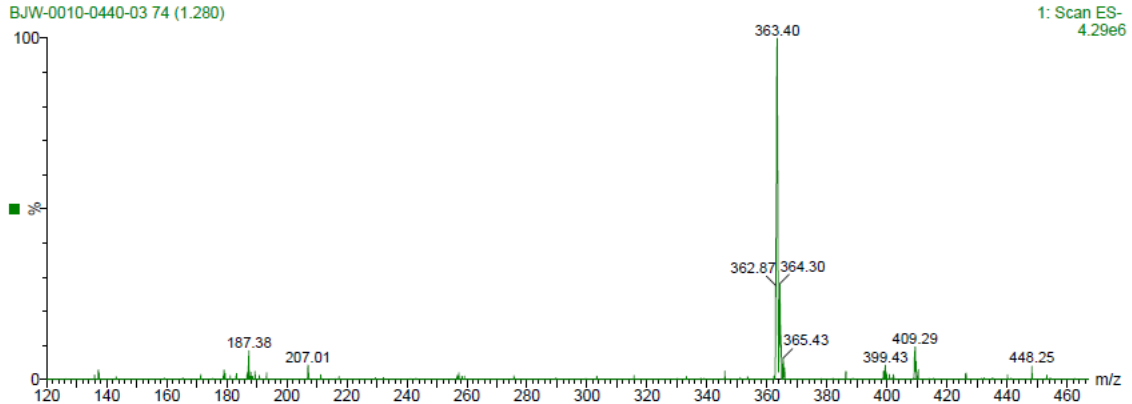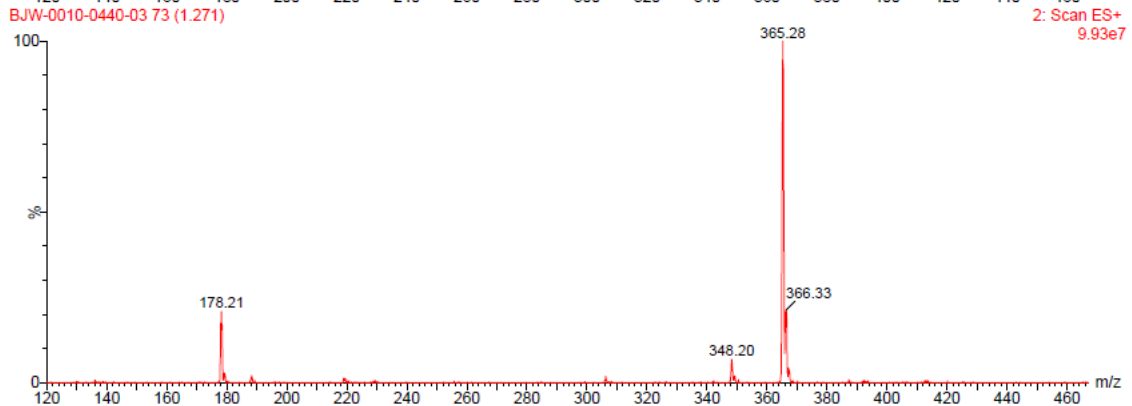

# LCMS Spectra for compound 15a

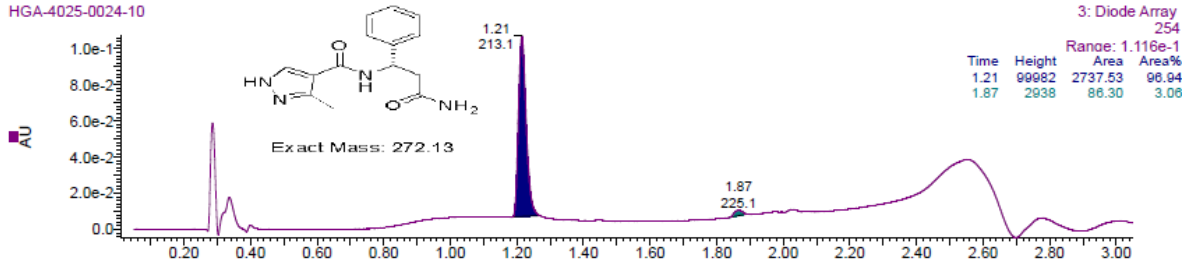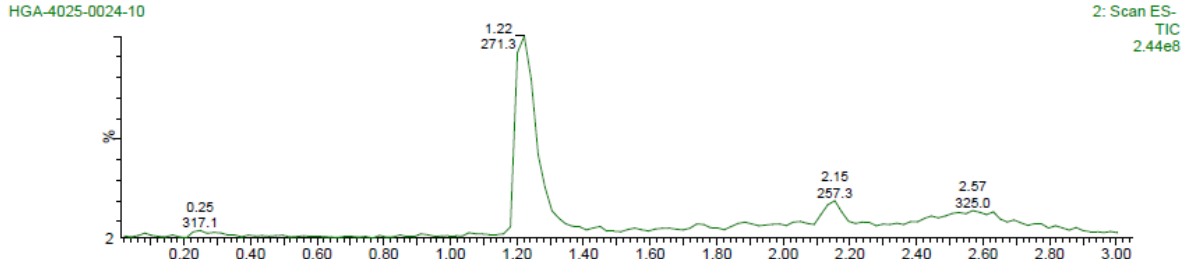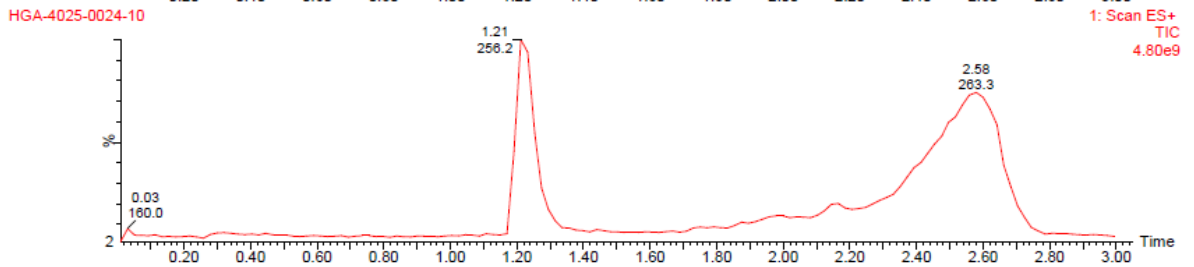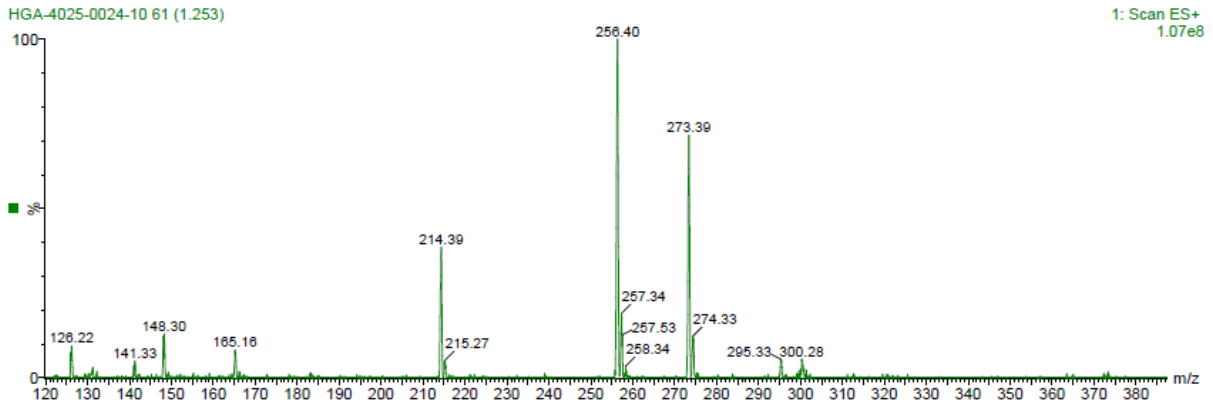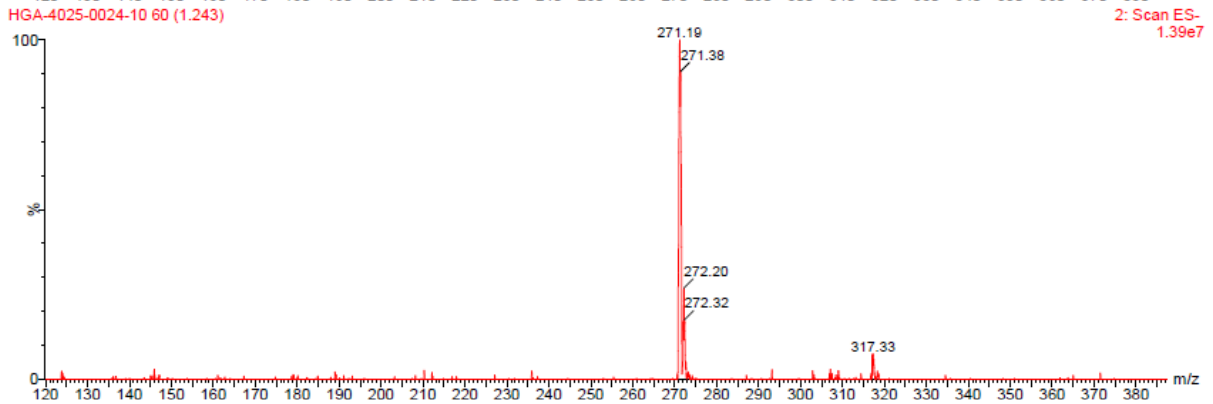

# LCMS Spectra for compound 15b

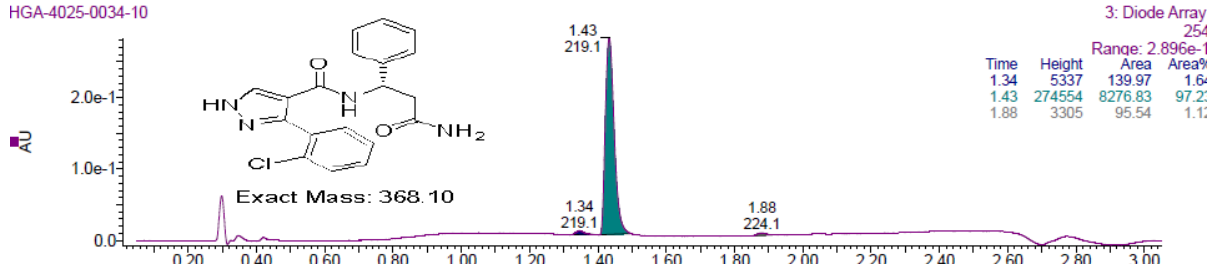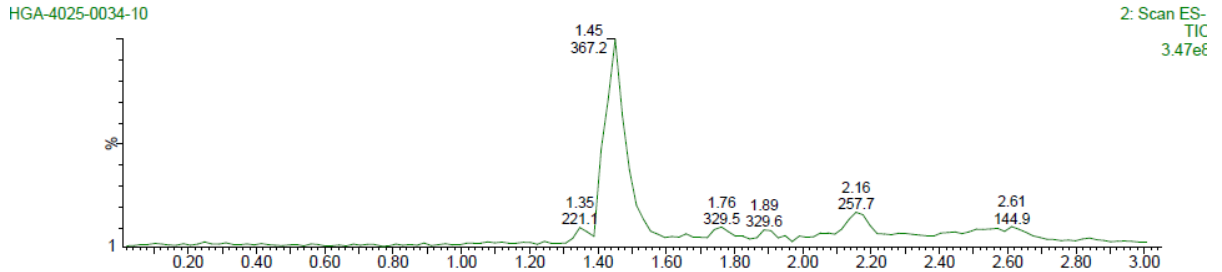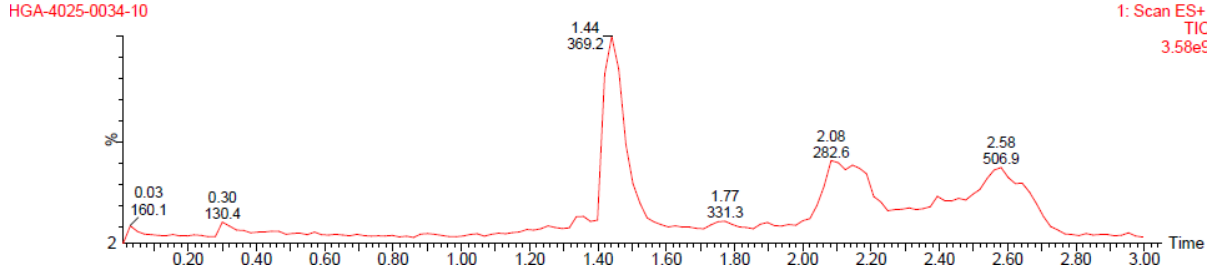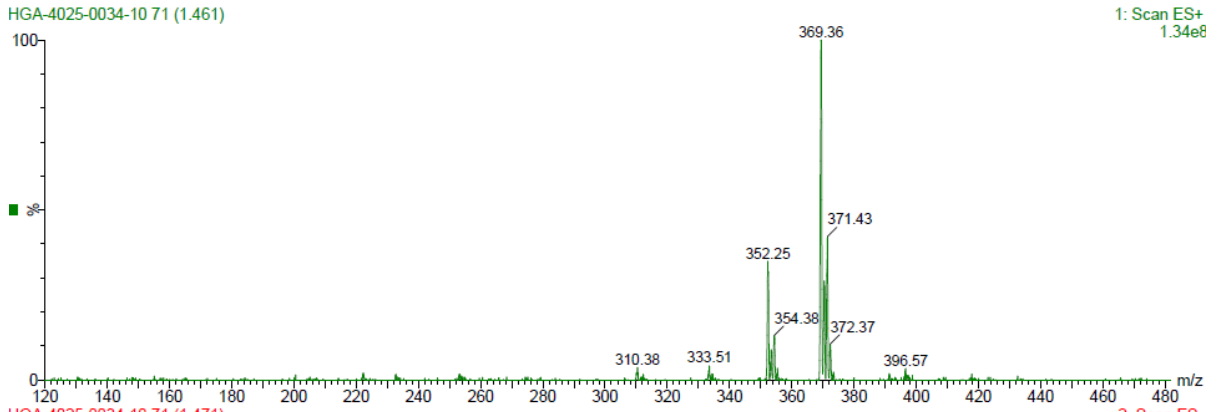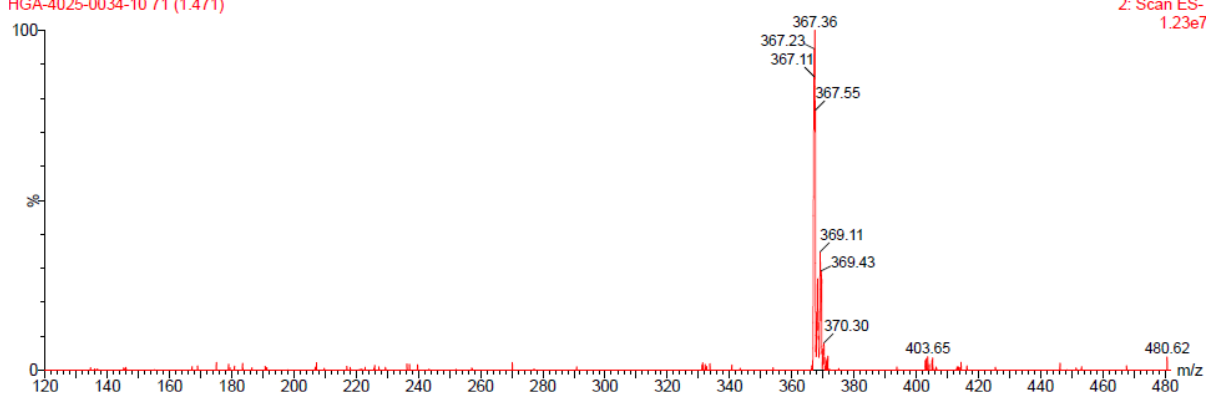

# LCMS Spectra for compound 15c

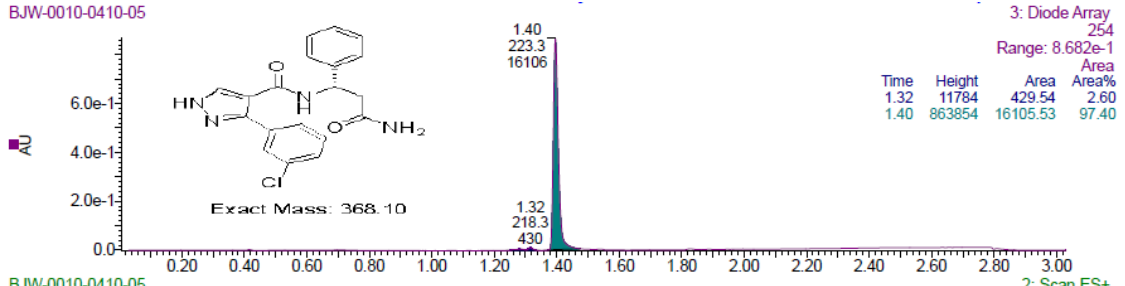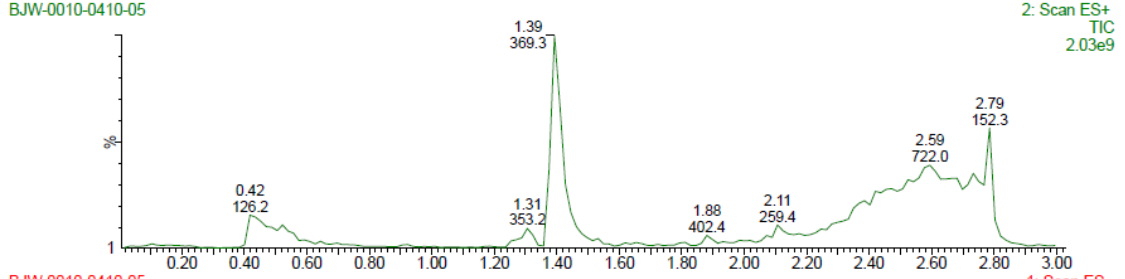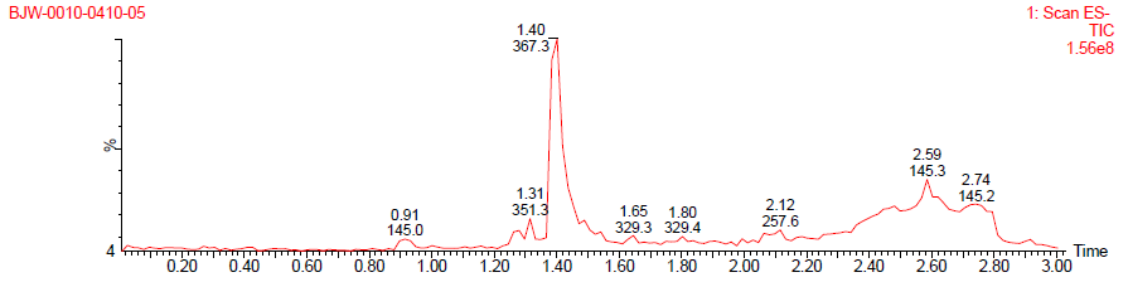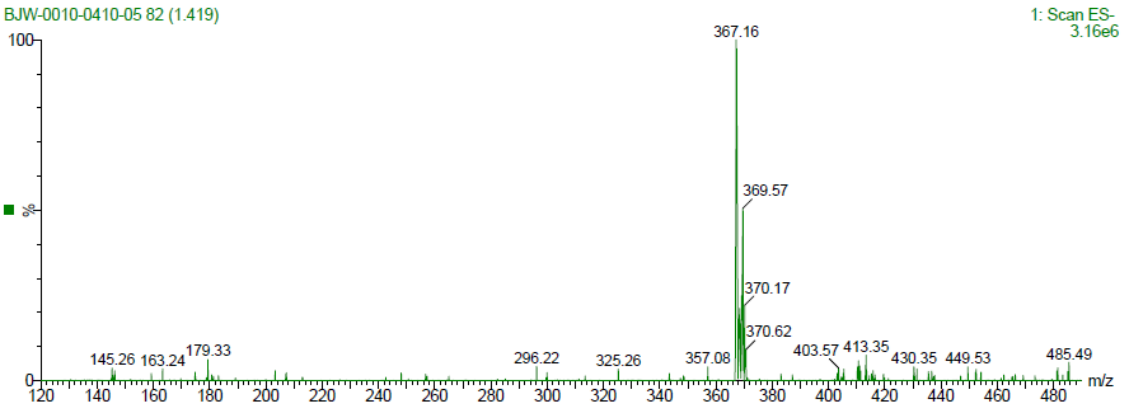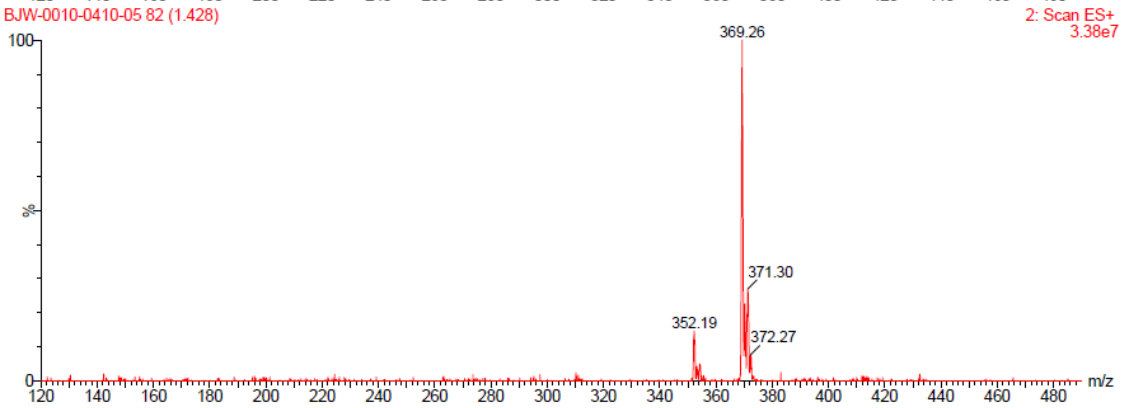

# LCMS Spectra for compound 15d

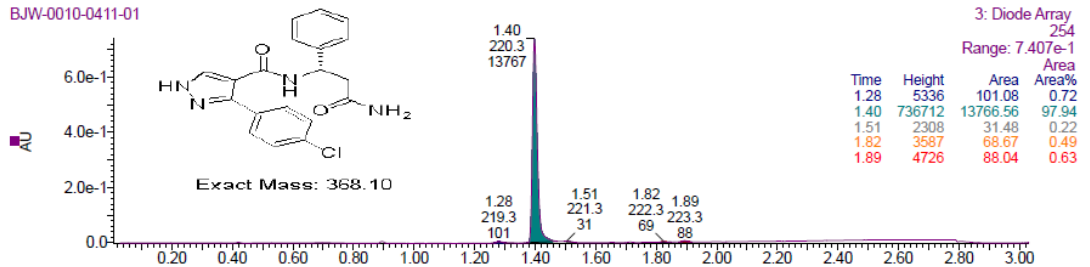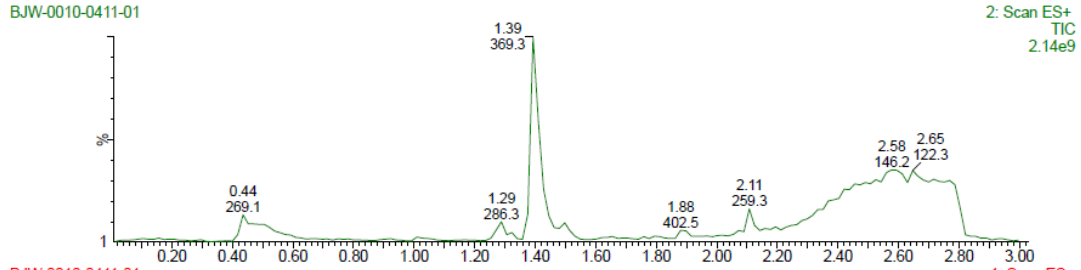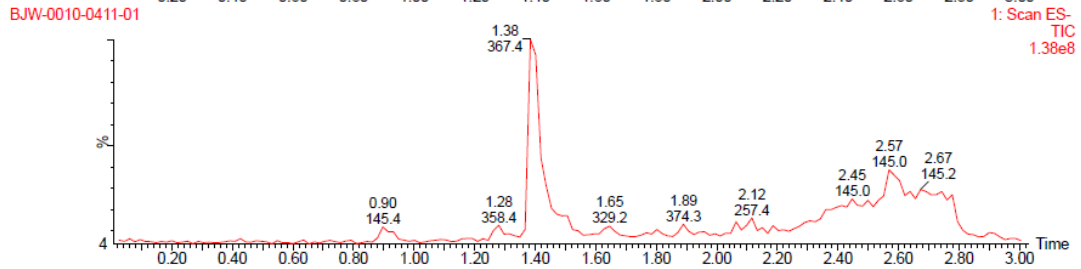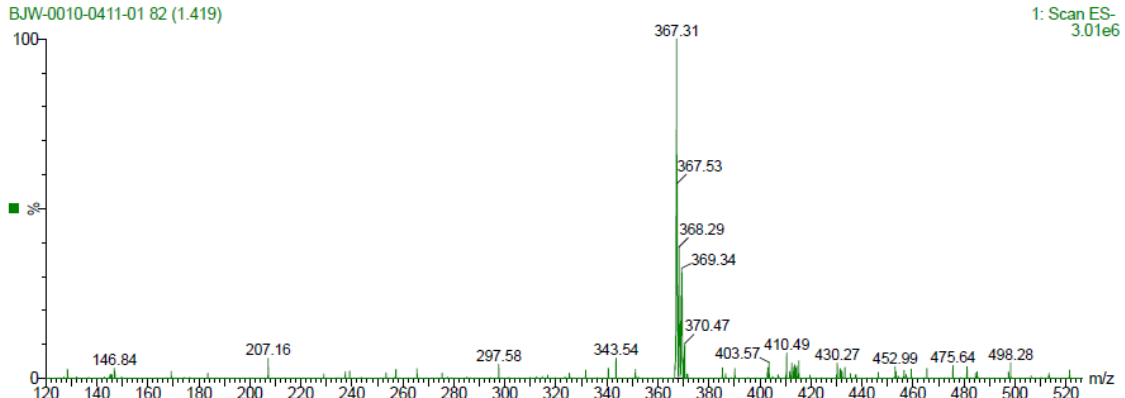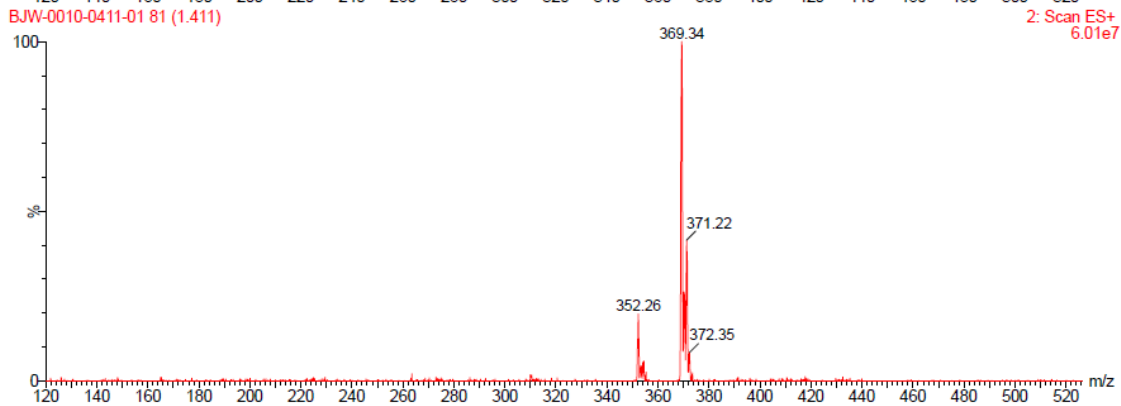



# LCMS Spectra for compound 15e

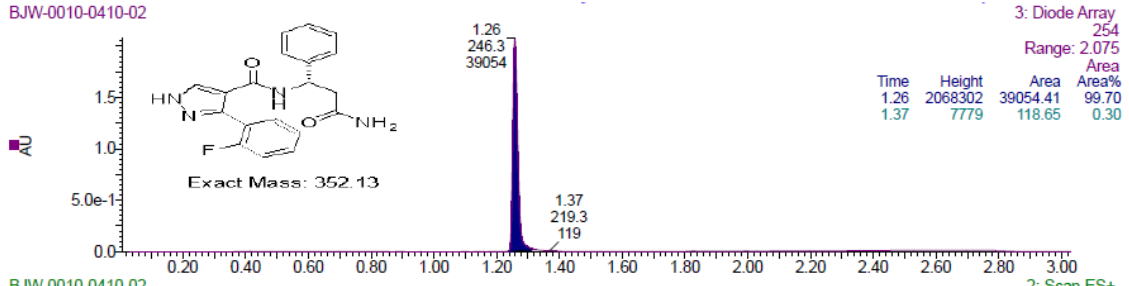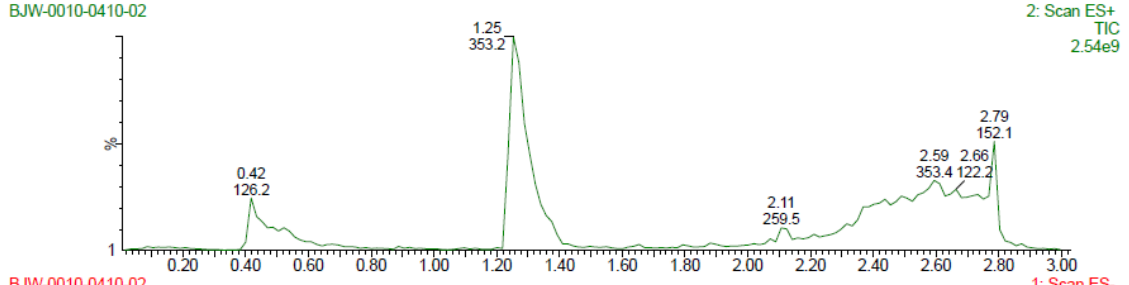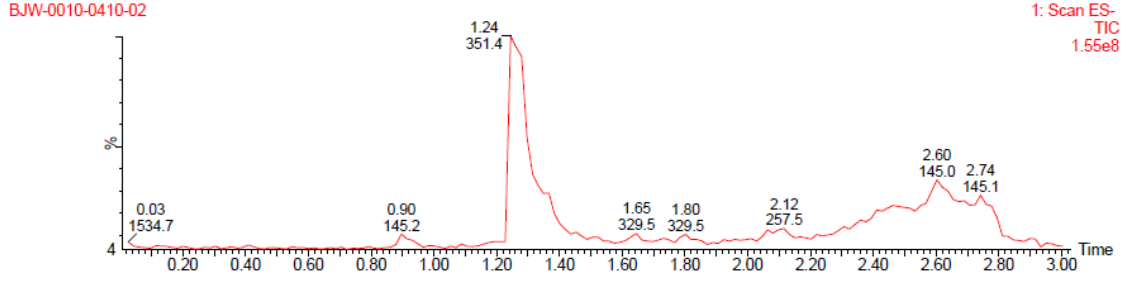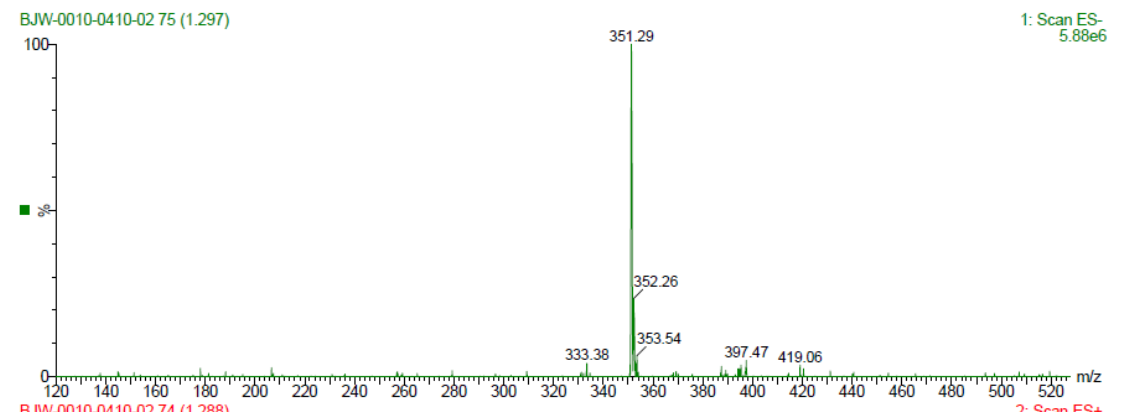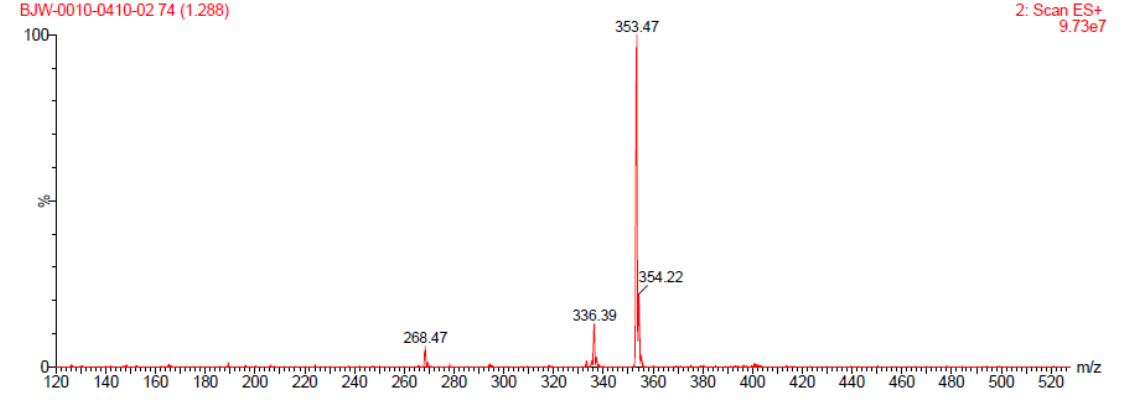

# LCMS Spectra for compound 15f

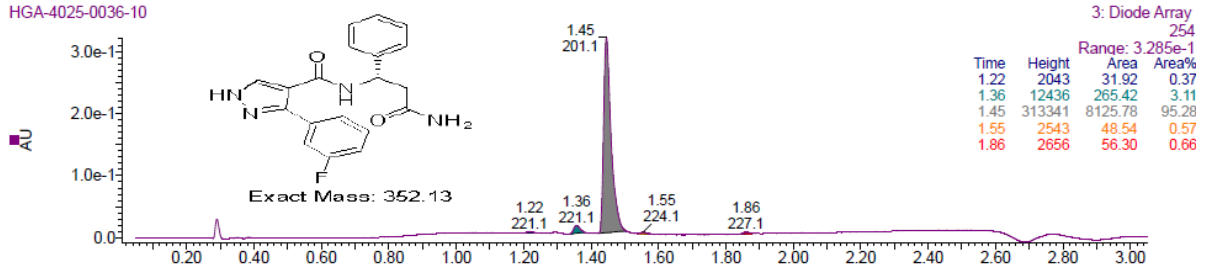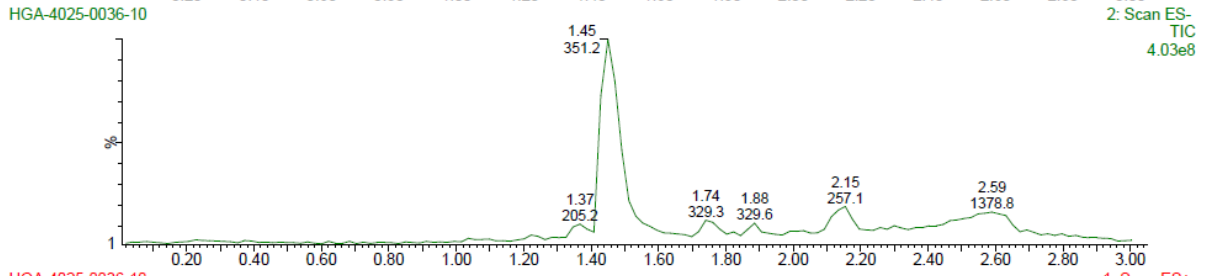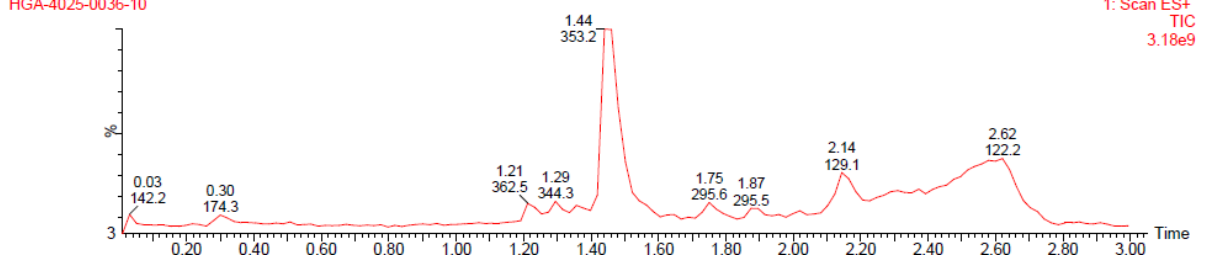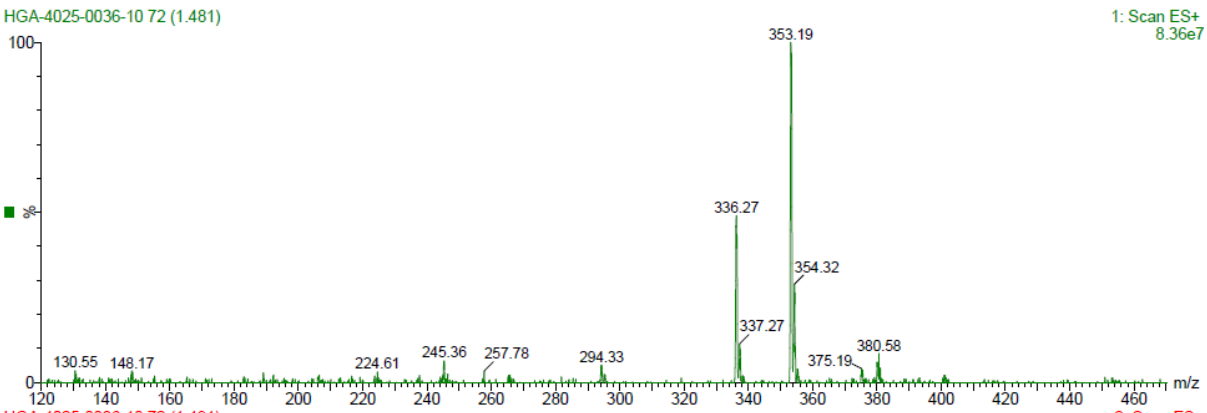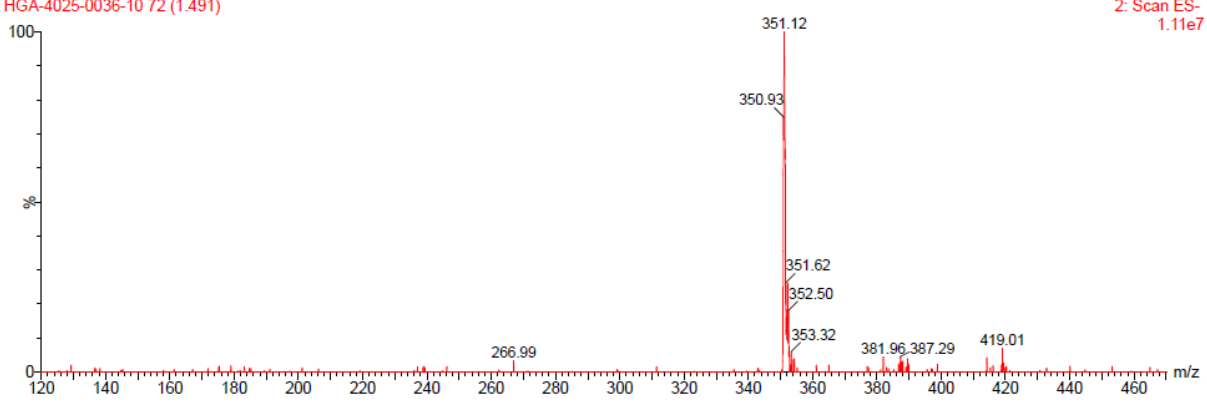

# LCMS Spectra for compound 15g

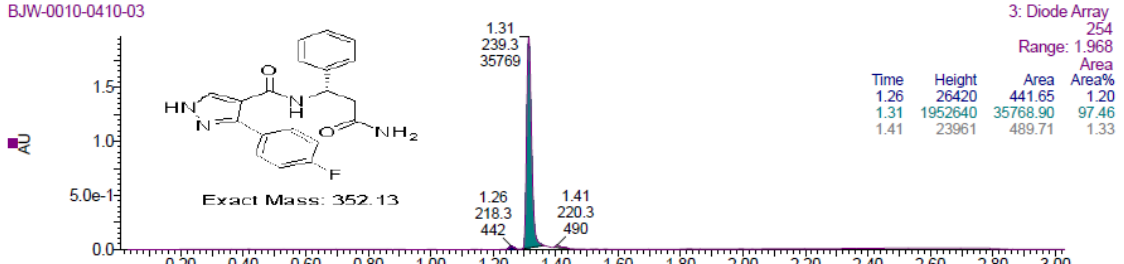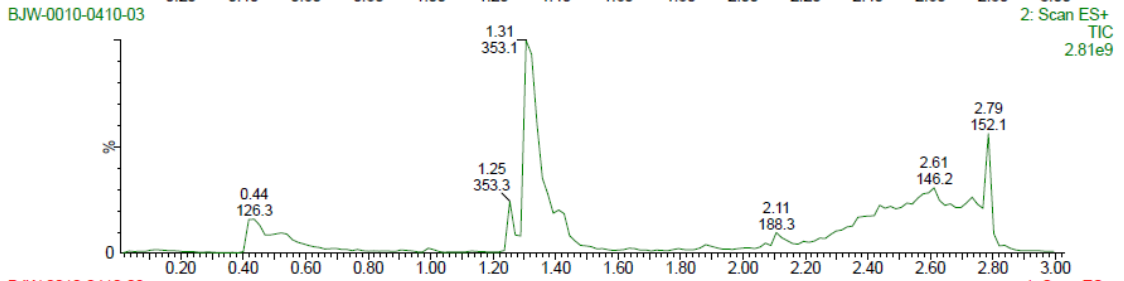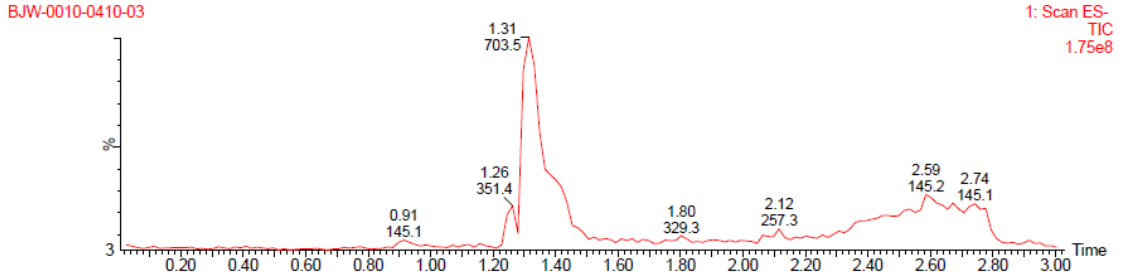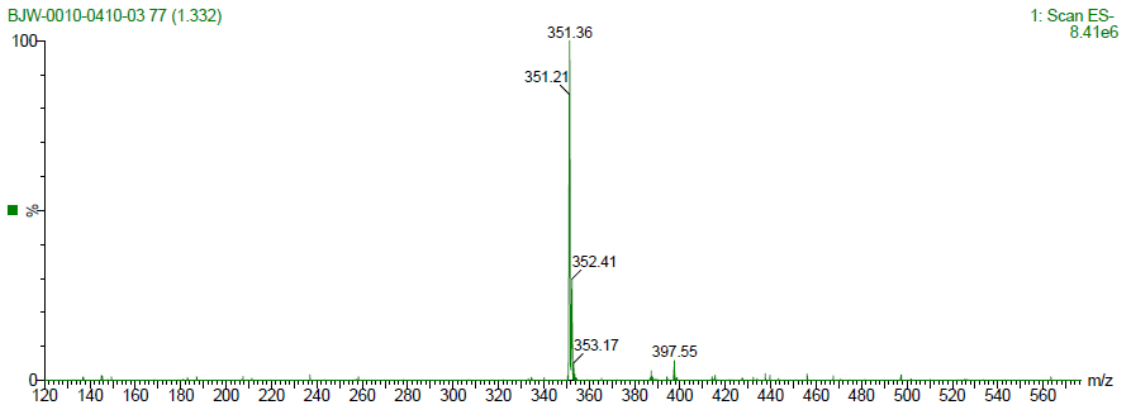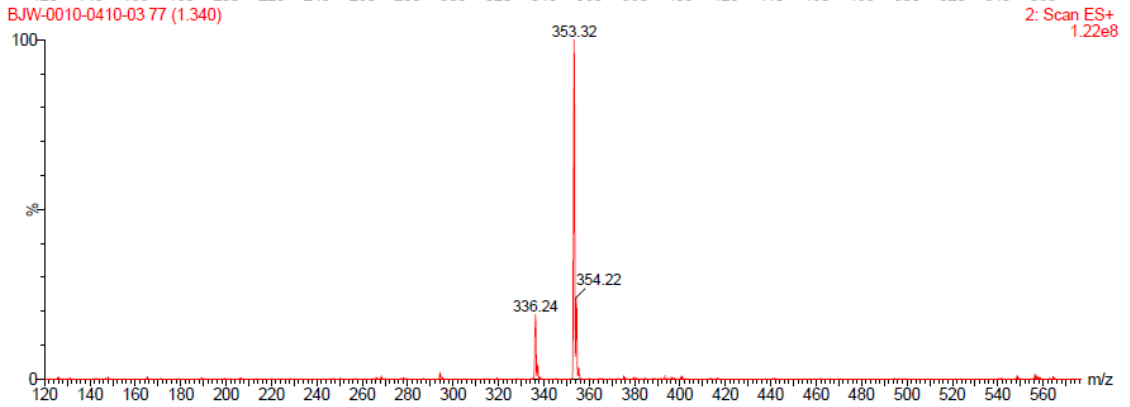

# LCMS Spectra for compound 15h

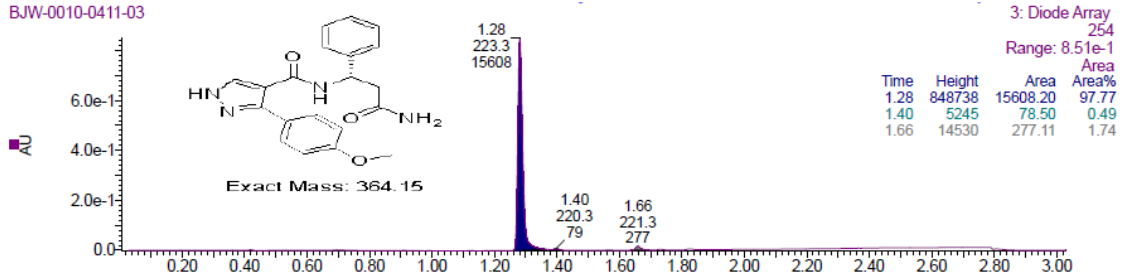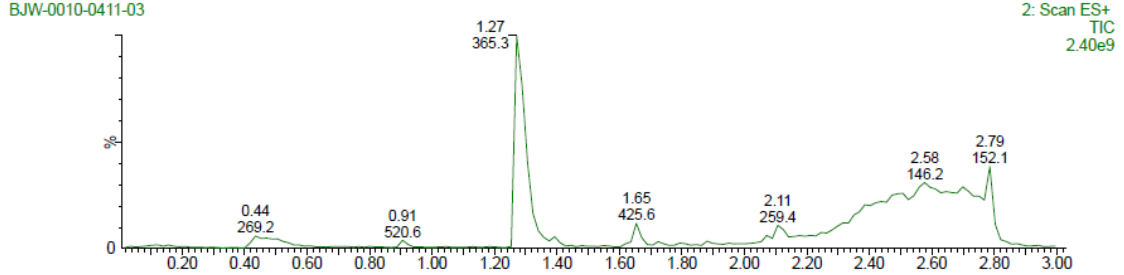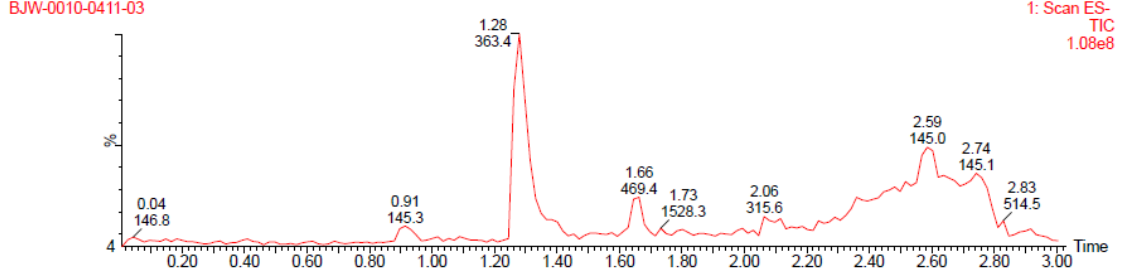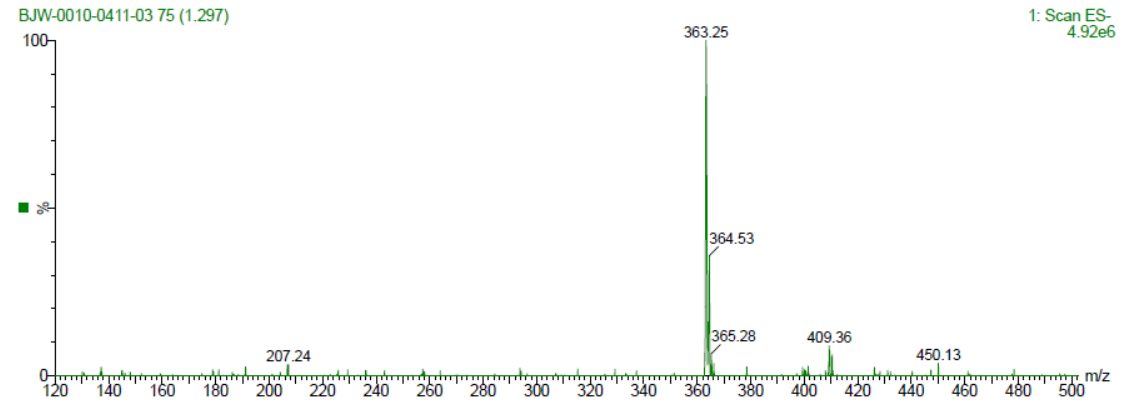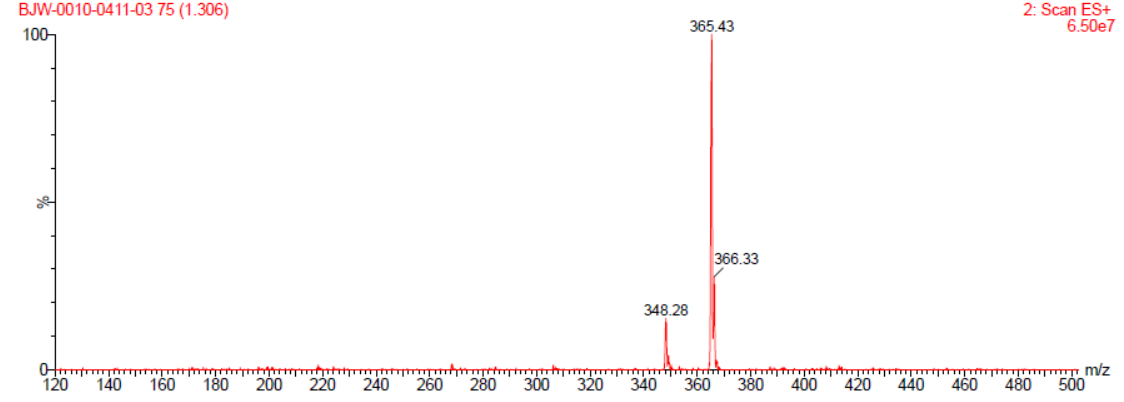

# LCMS Spectra for compound 15i

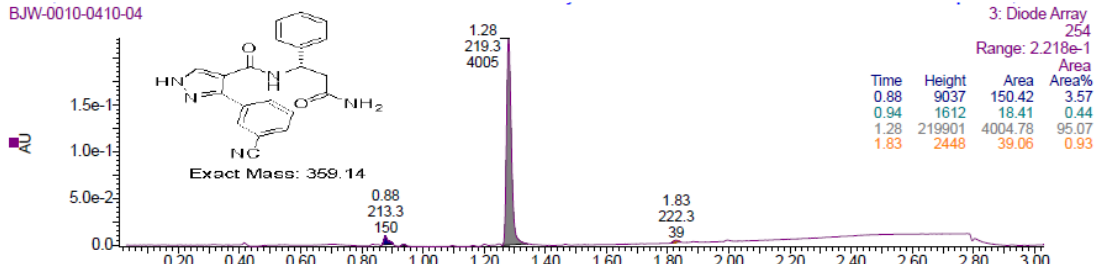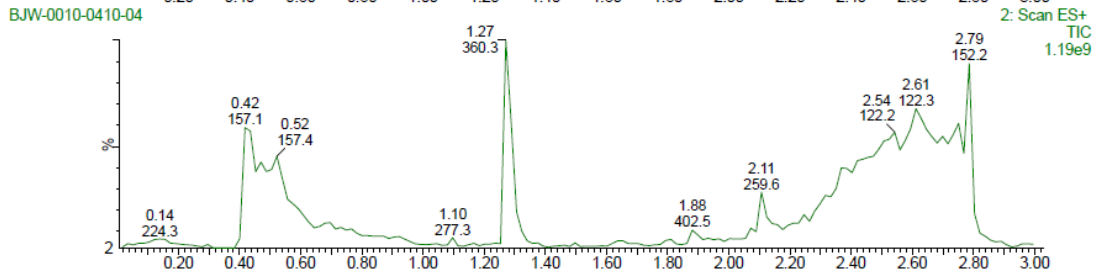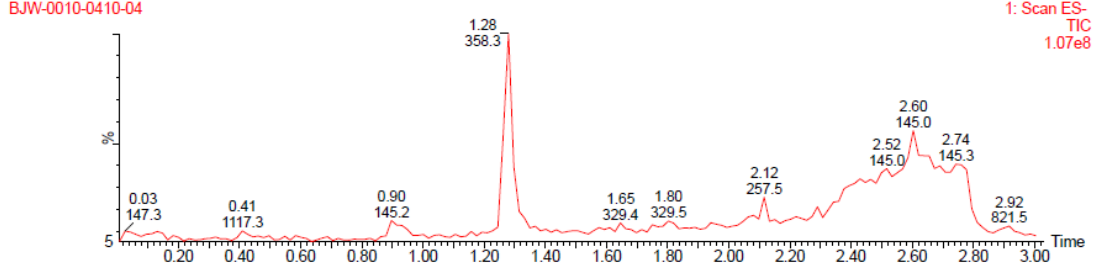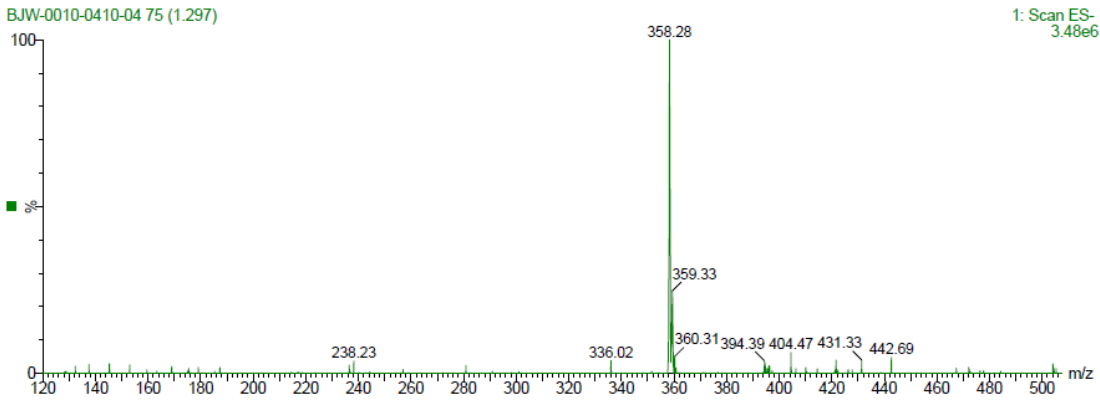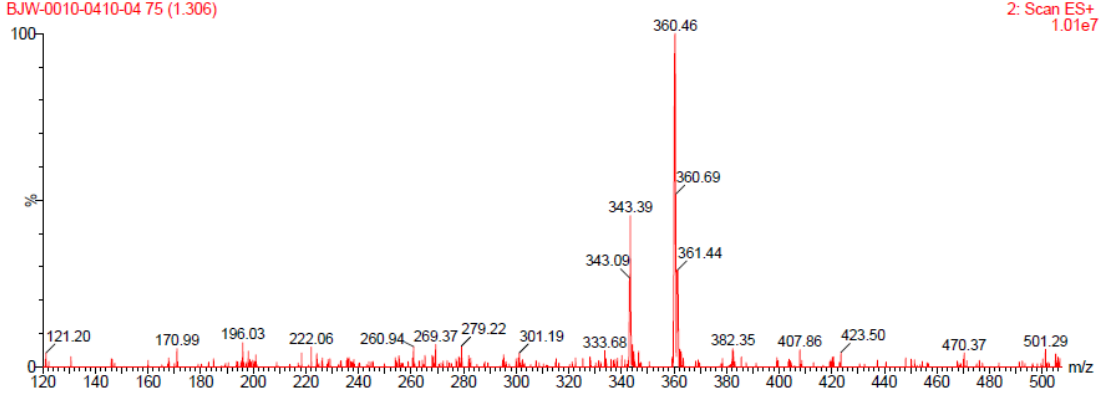

# LCMS Spectra for compound 15j

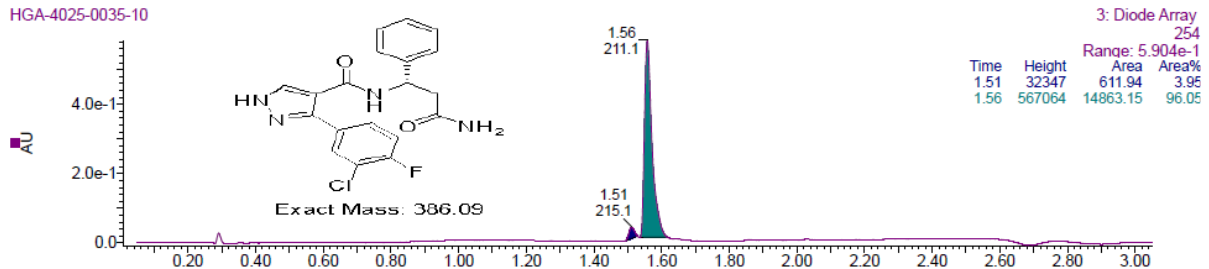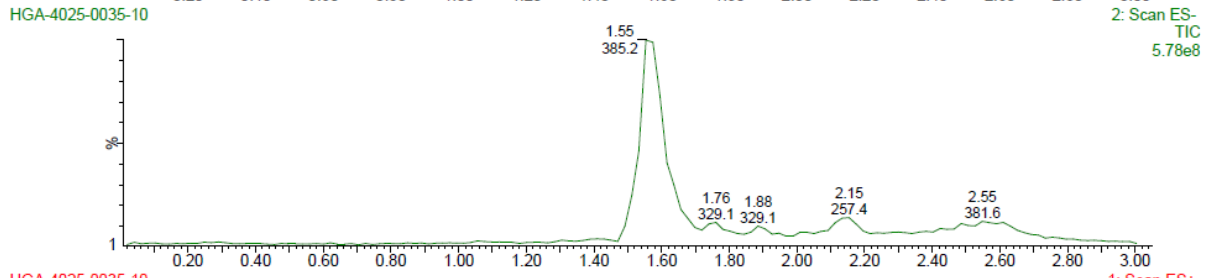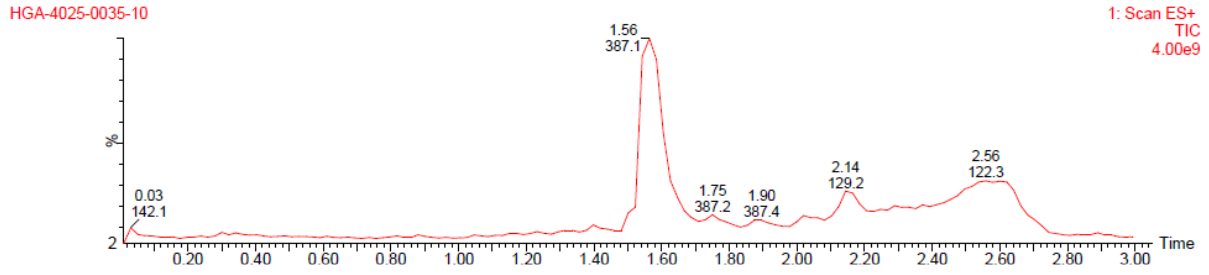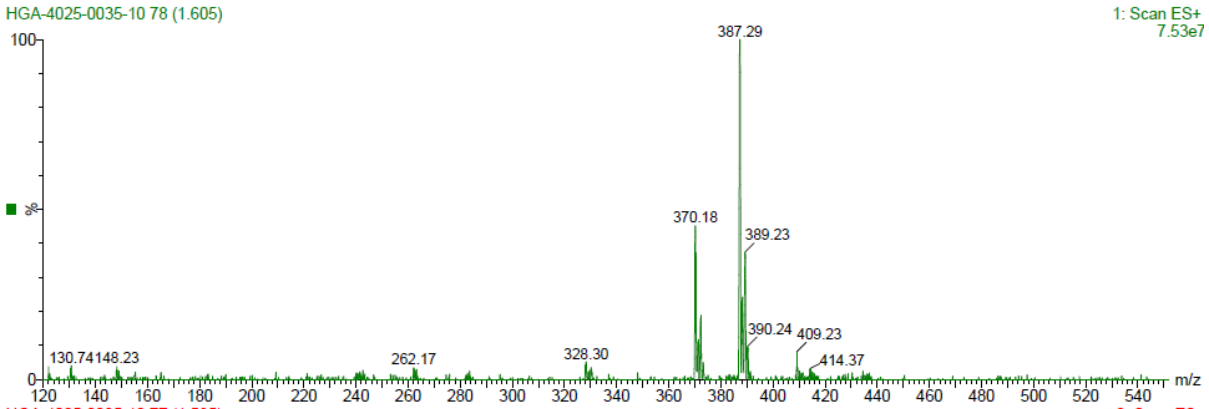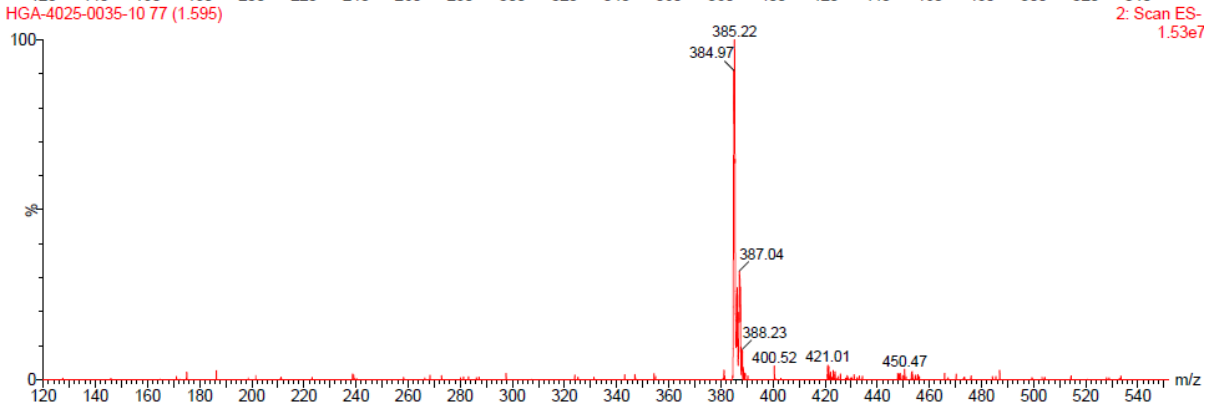

# LCMS Spectra for compound 26a

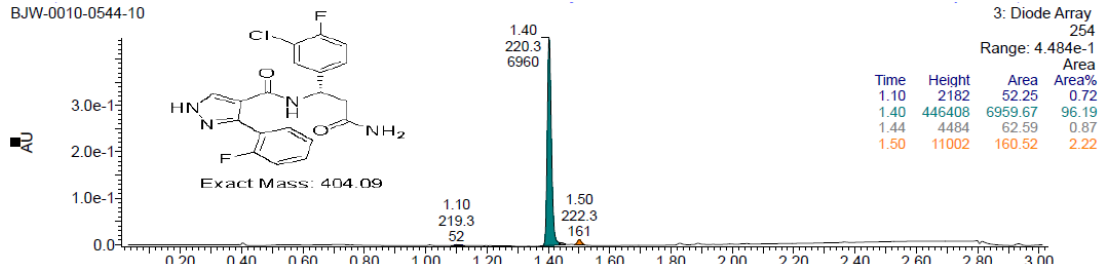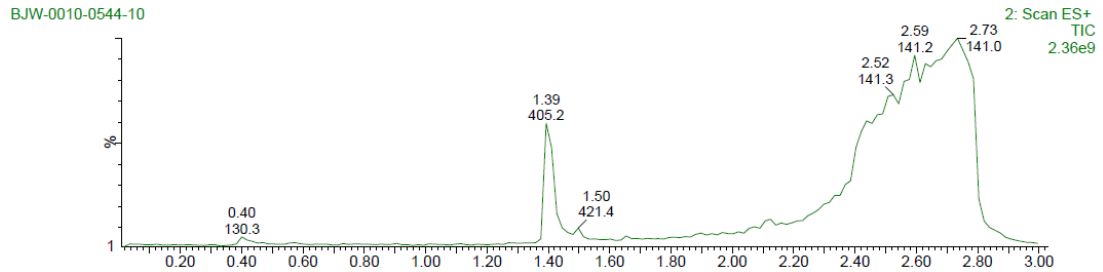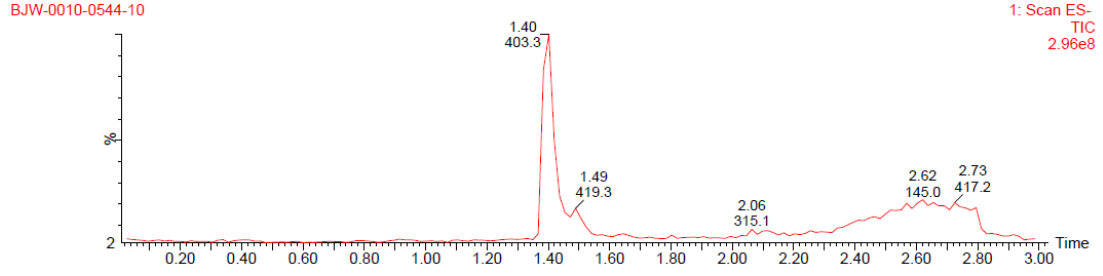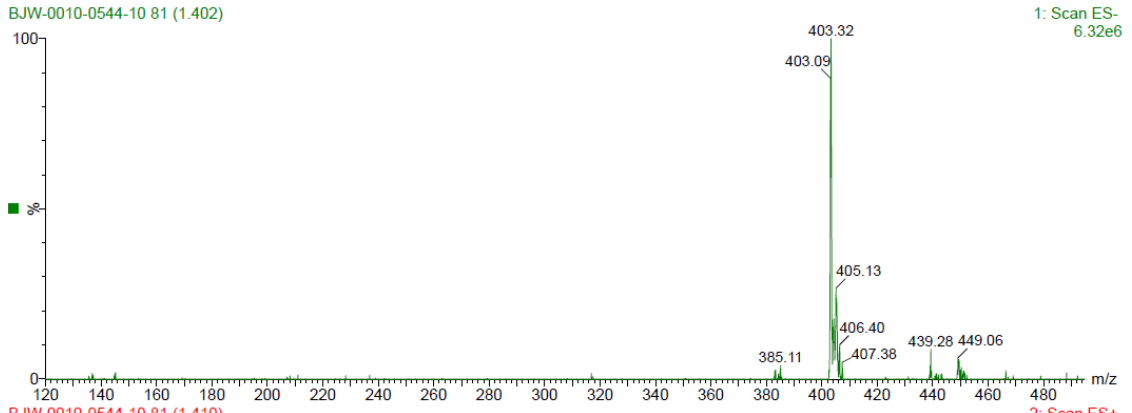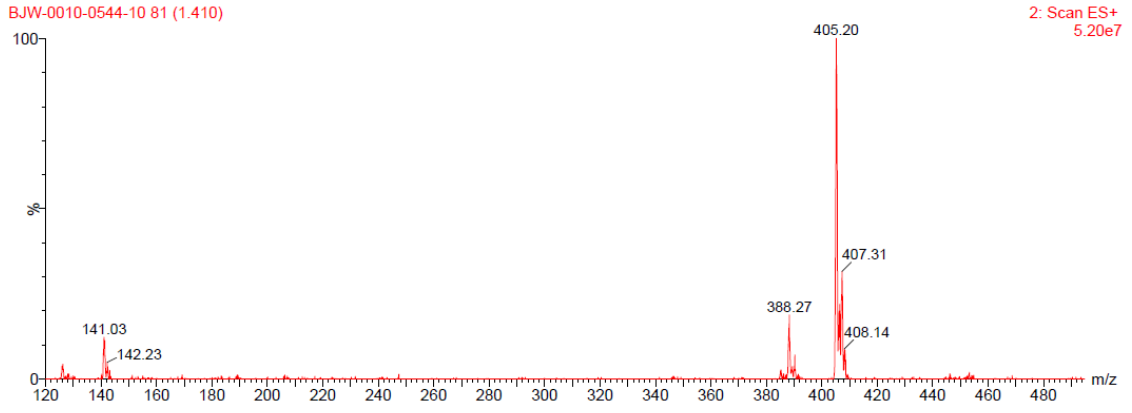

# LCMS Spectra for compound 26b

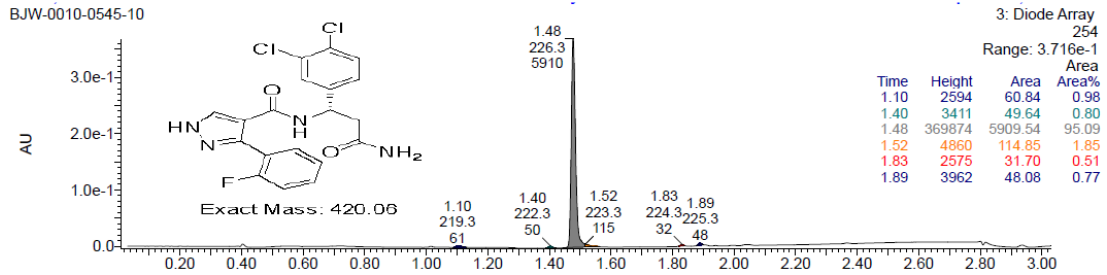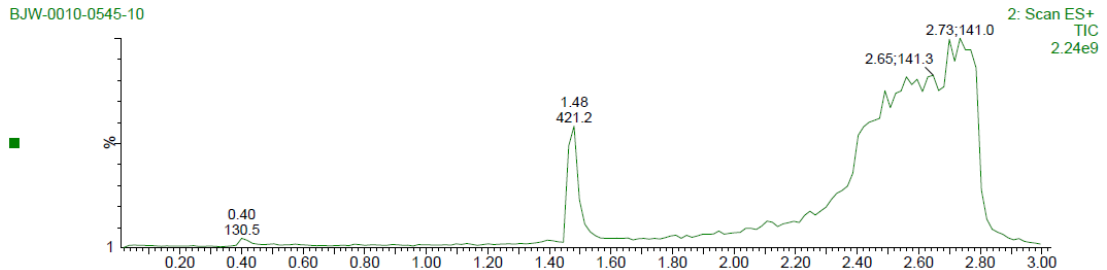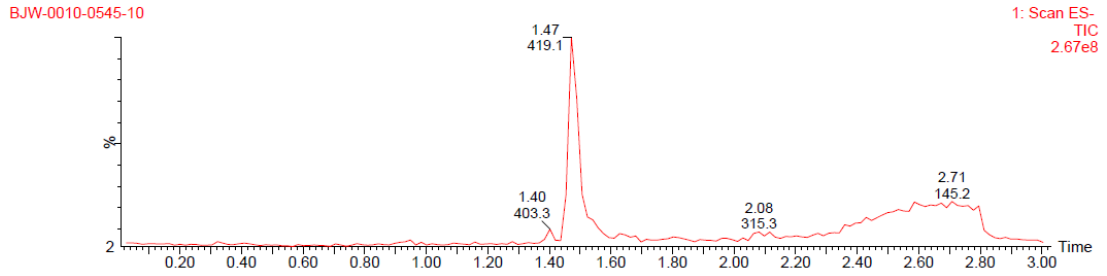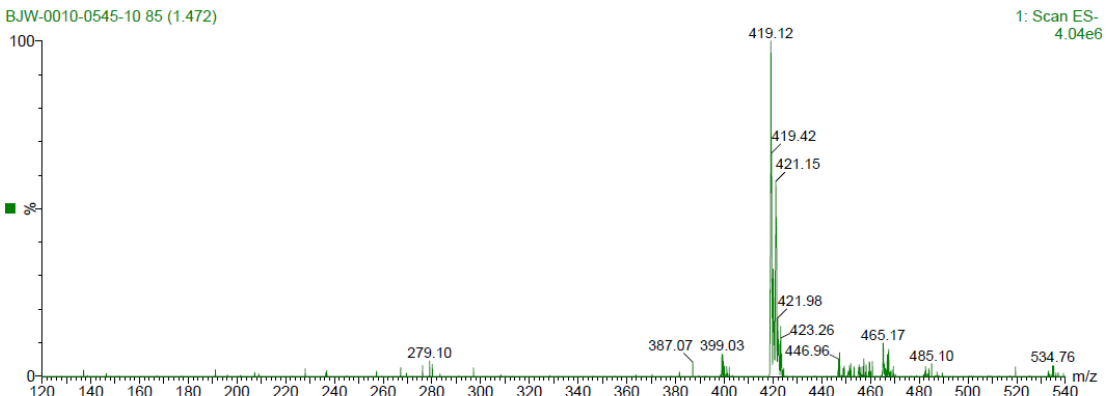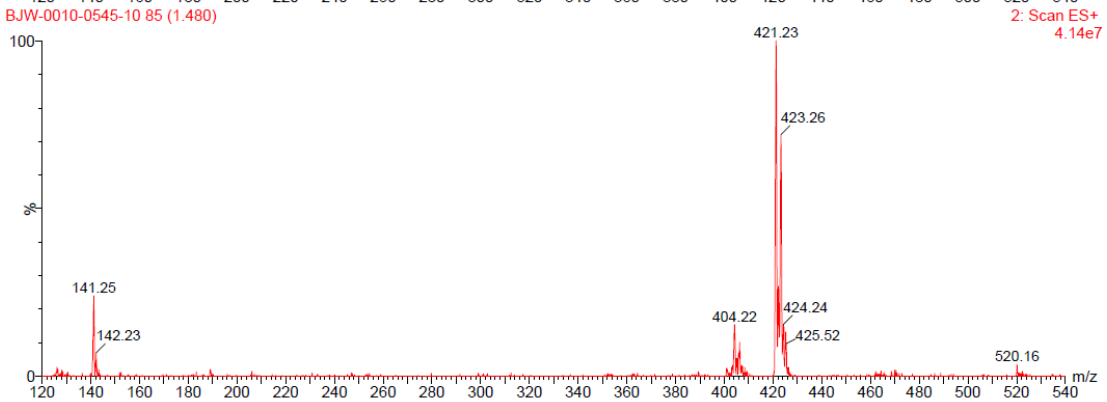



# LCMS Spectra for compound 26c

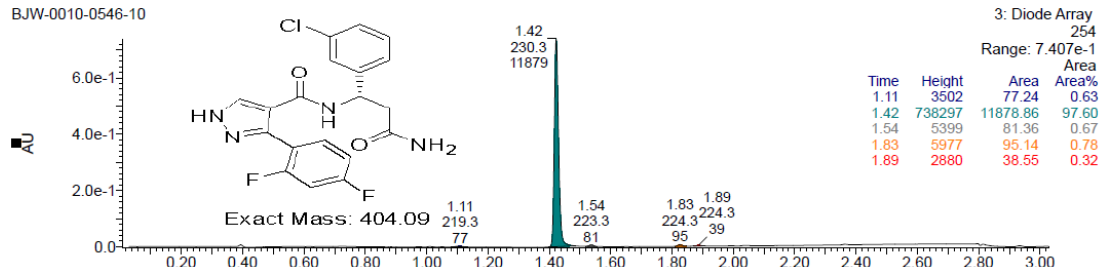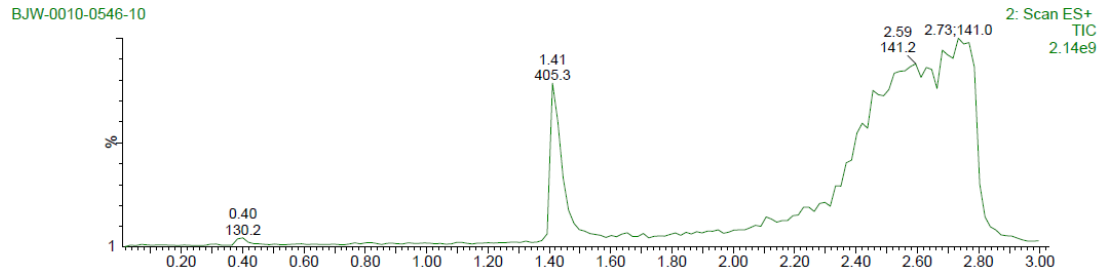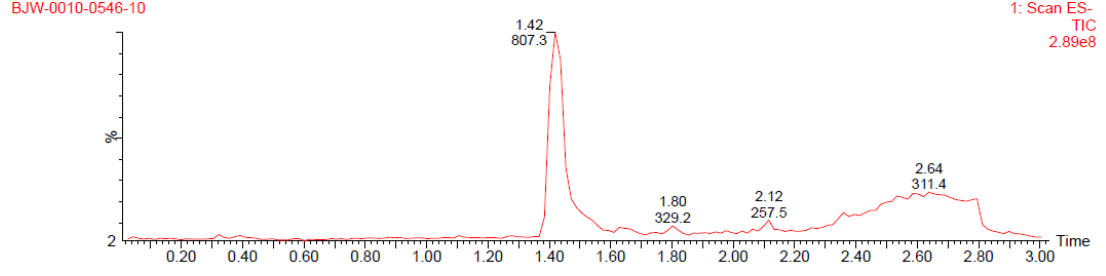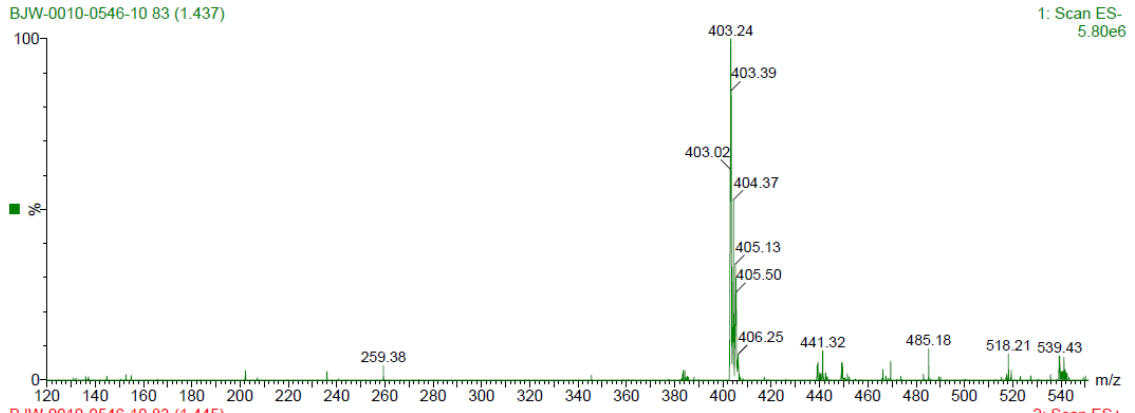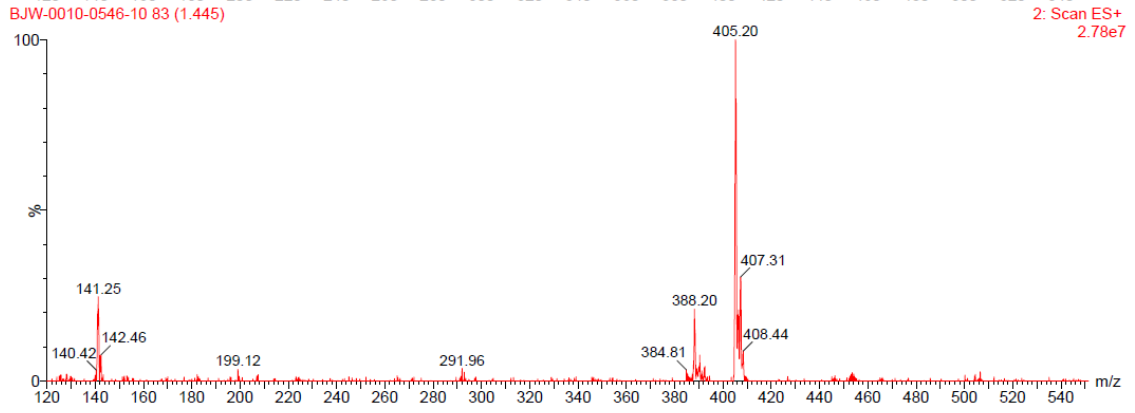

# LCMS Spectra for compound 26d

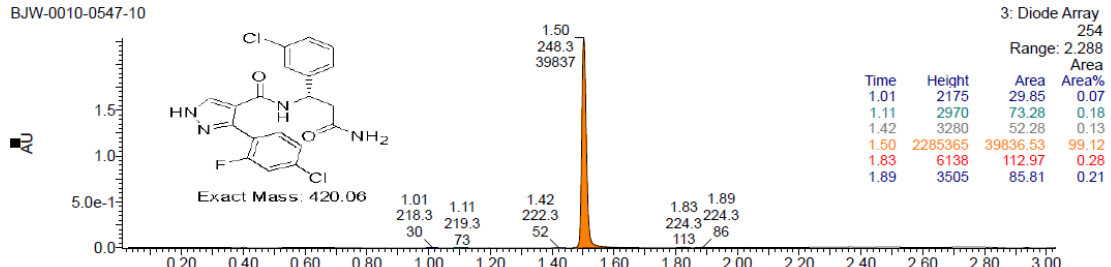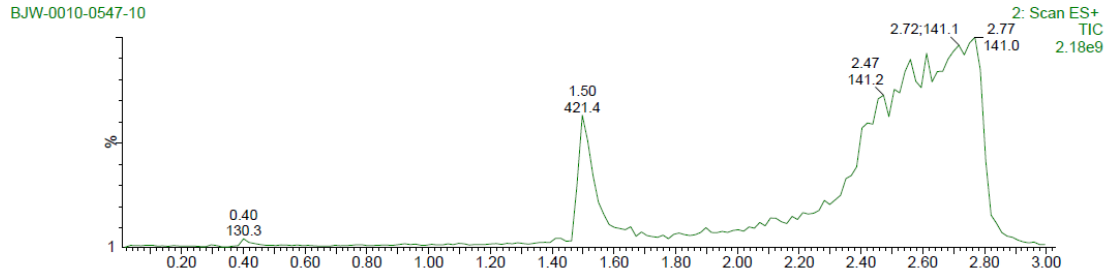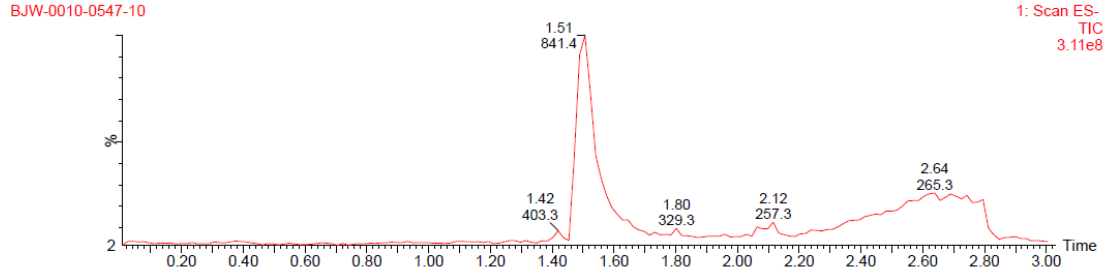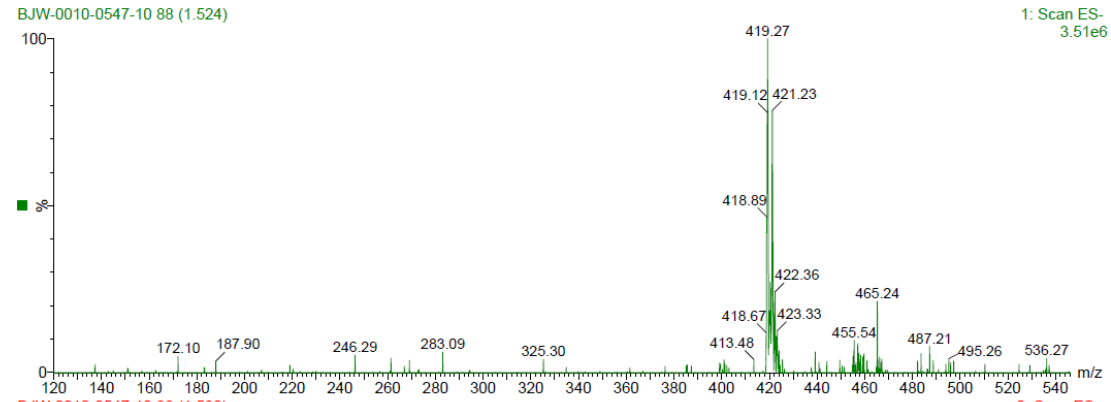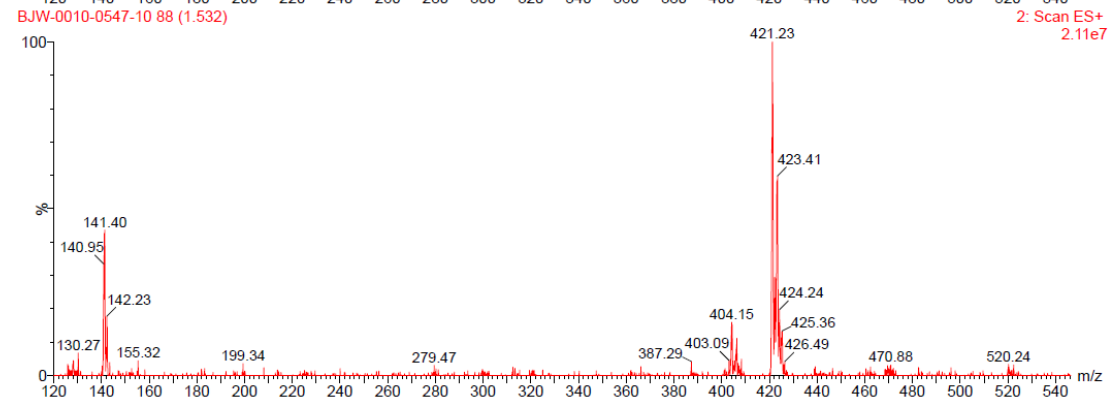

# LCMS Spectra for compound 26e

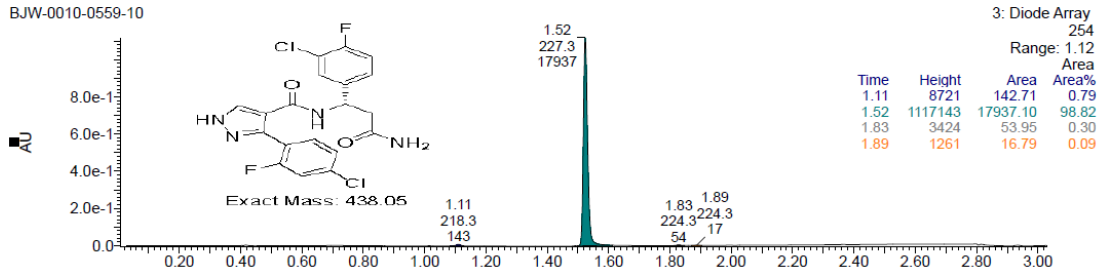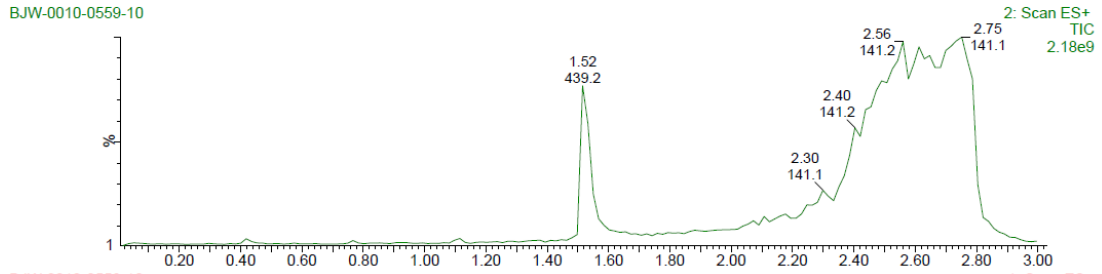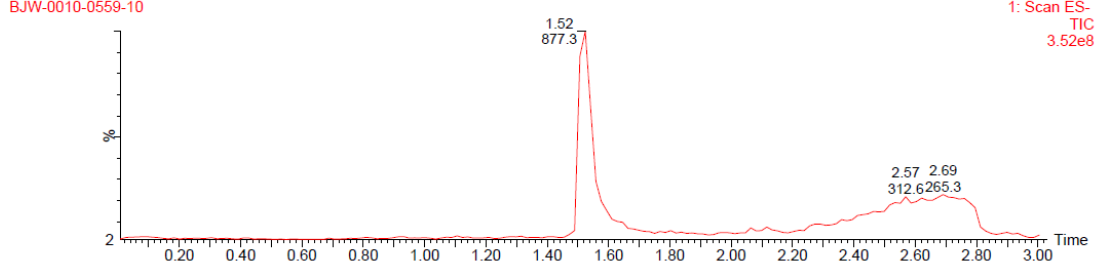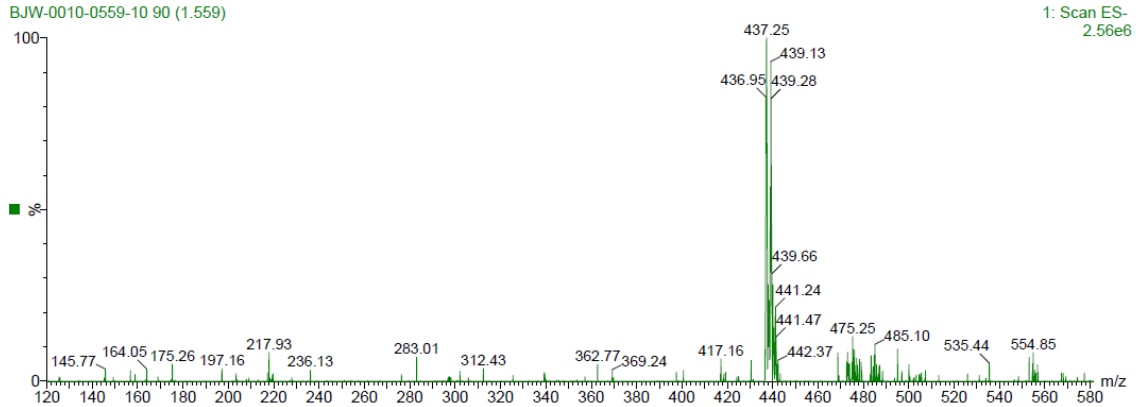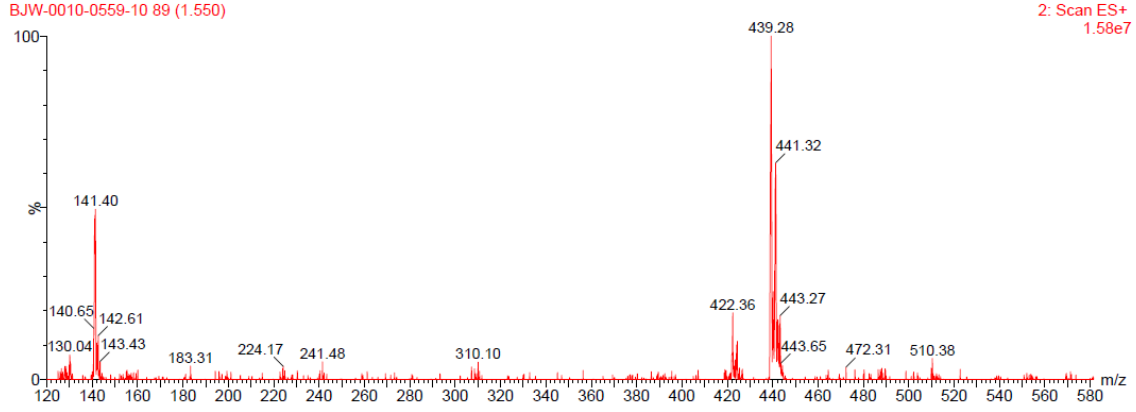

Supplement: jm2c02132_si_001.pdf [file jm2c02132_si_001.pdf]
